# Supplementary material for: Synthesis and Fungicidal Activity of 1-(Carbamoylmethyl)-2-aryl-3,1-benzoxazines
Source: MDPI journal article supplement (doi:10.3390/molecules22071103), 2017-07-03
Supplement: s1 [file s1]

---

**Supporting Information for**

**Synthesis and Fungicidal Activity of**

**1-(Carbamoylmethyl)-2-aryl-3,1-benzoxazines**

**Zi-Long Tang<sup>1,2,\*</sup>, Lian Wang<sup>1,2</sup>, Jing-Zhao Tan<sup>1,2</sup>, Yi-Chao Wan<sup>1</sup>, Yin-Chun Jiao<sup>2</sup>**

1 Key Laboratory of Theoretical Organic Chemistry and Functional Molecule of Ministry of Education, Hunan University of Science and Technology, Xiangtan 411201, China;

2 School of Chemistry and Chemical Engineering, Hunan University of Science and Technology, Xiangtan 411201, China

**Table of contents**

|                                                                              |         |
|------------------------------------------------------------------------------|---------|
| 1 <sup>1</sup> H NMR and <sup>13</sup> C NMR Data for compounds <b>3a-3f</b> | P2-P13  |
| 2 <sup>1</sup> H NMR and <sup>13</sup> C NMR Data for compounds <b>5a-5r</b> | P14-P49 |

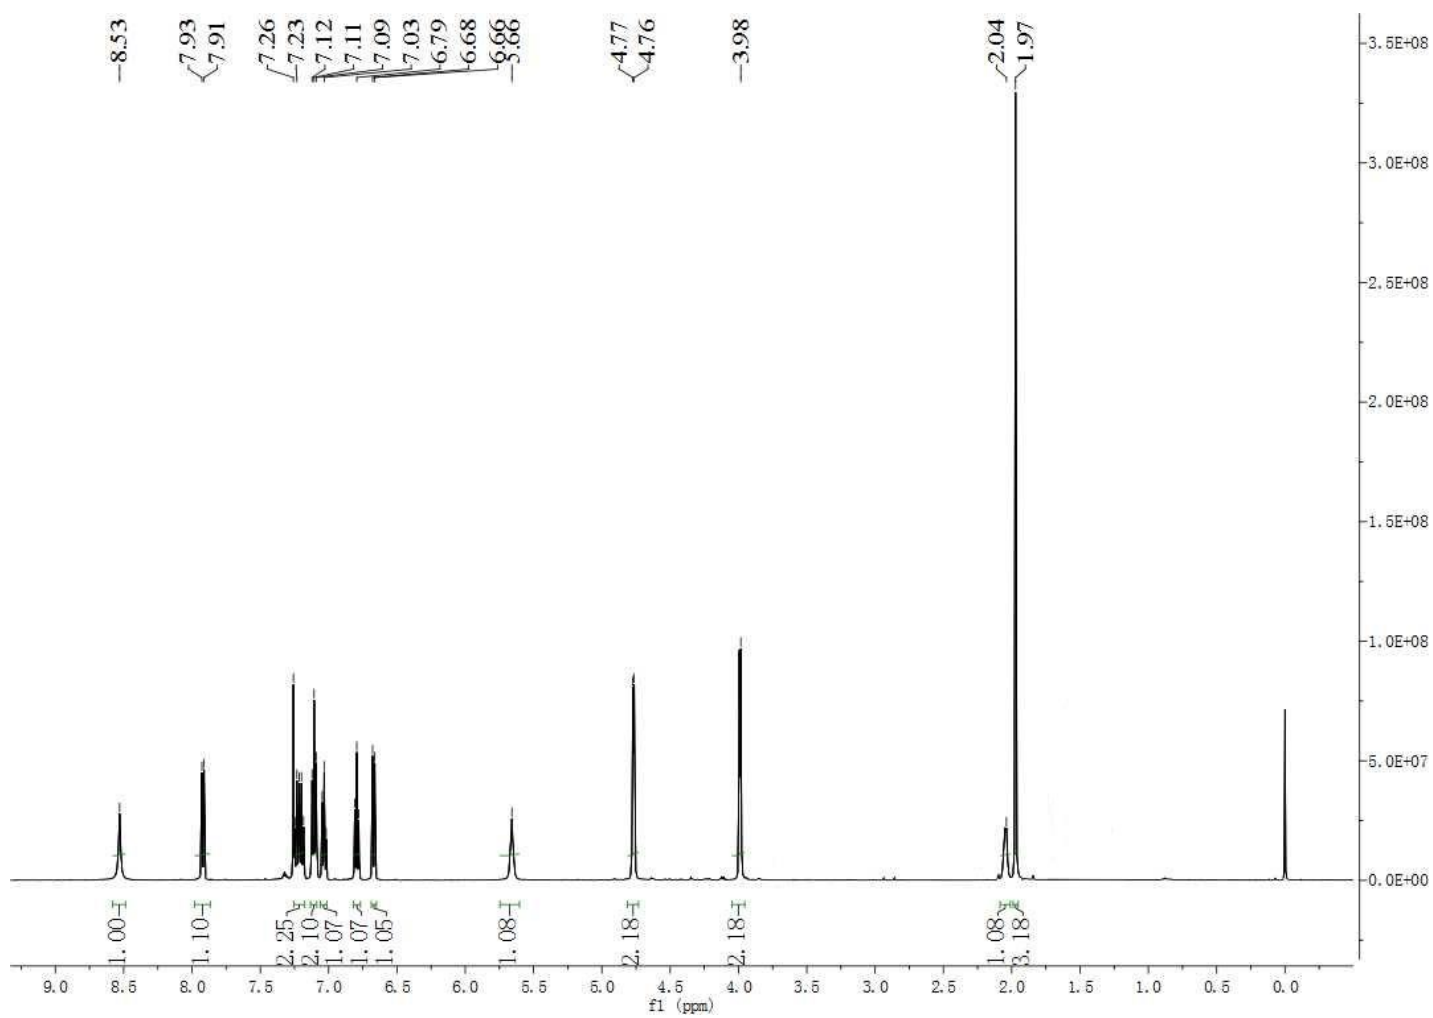

<sup>1</sup>H NMR of compound **3a**

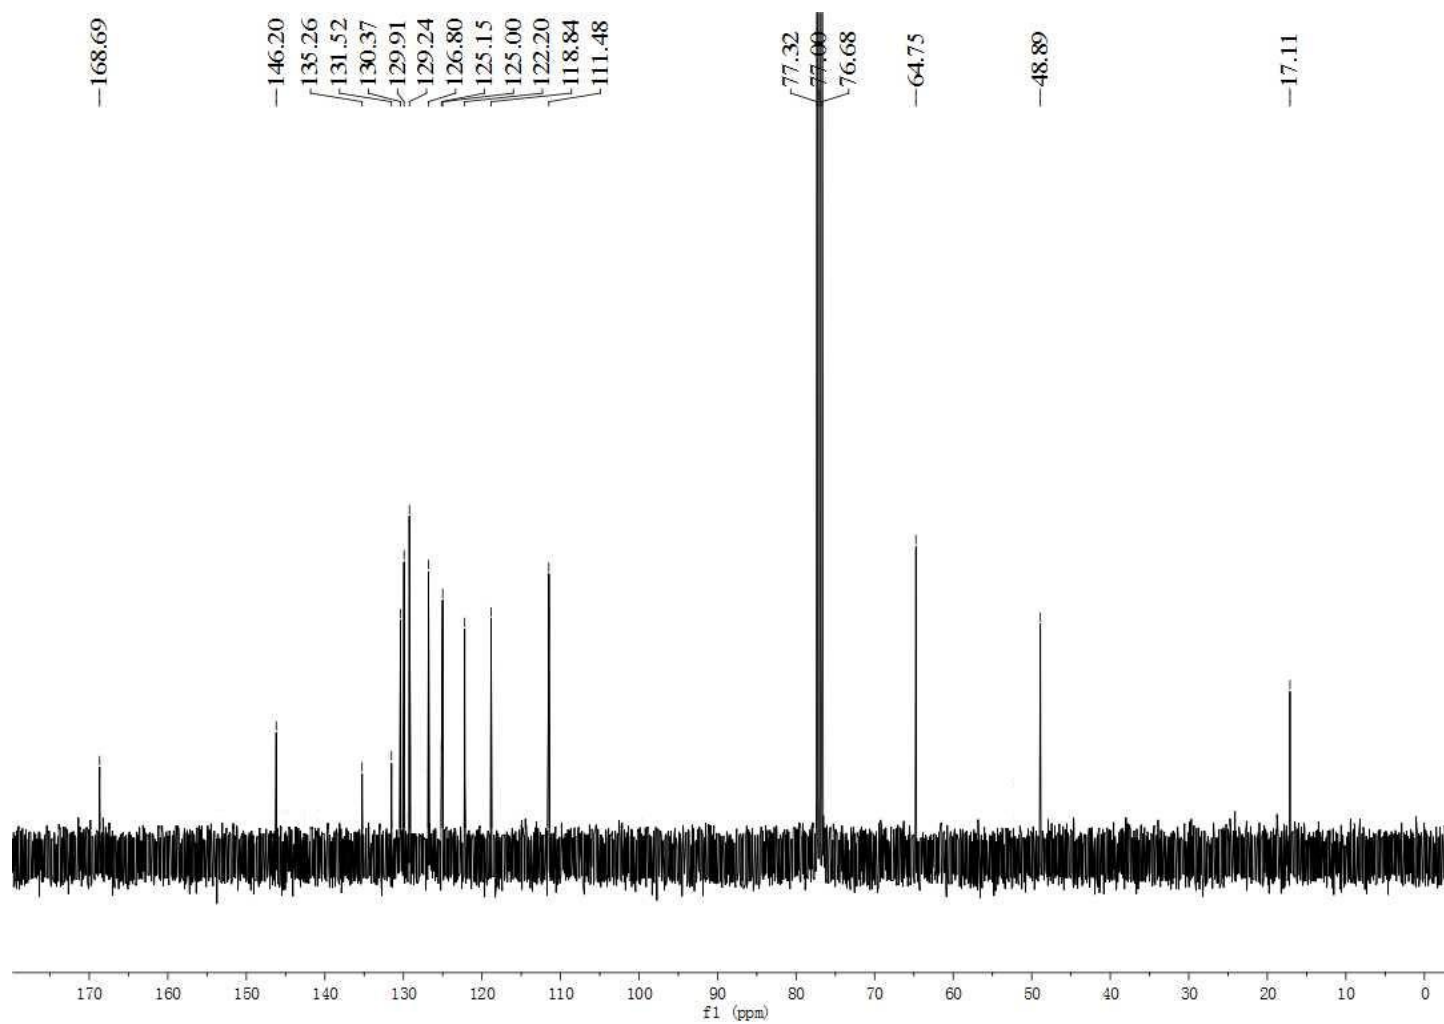

$^{13}\text{C}$  NMR of compound **3a**

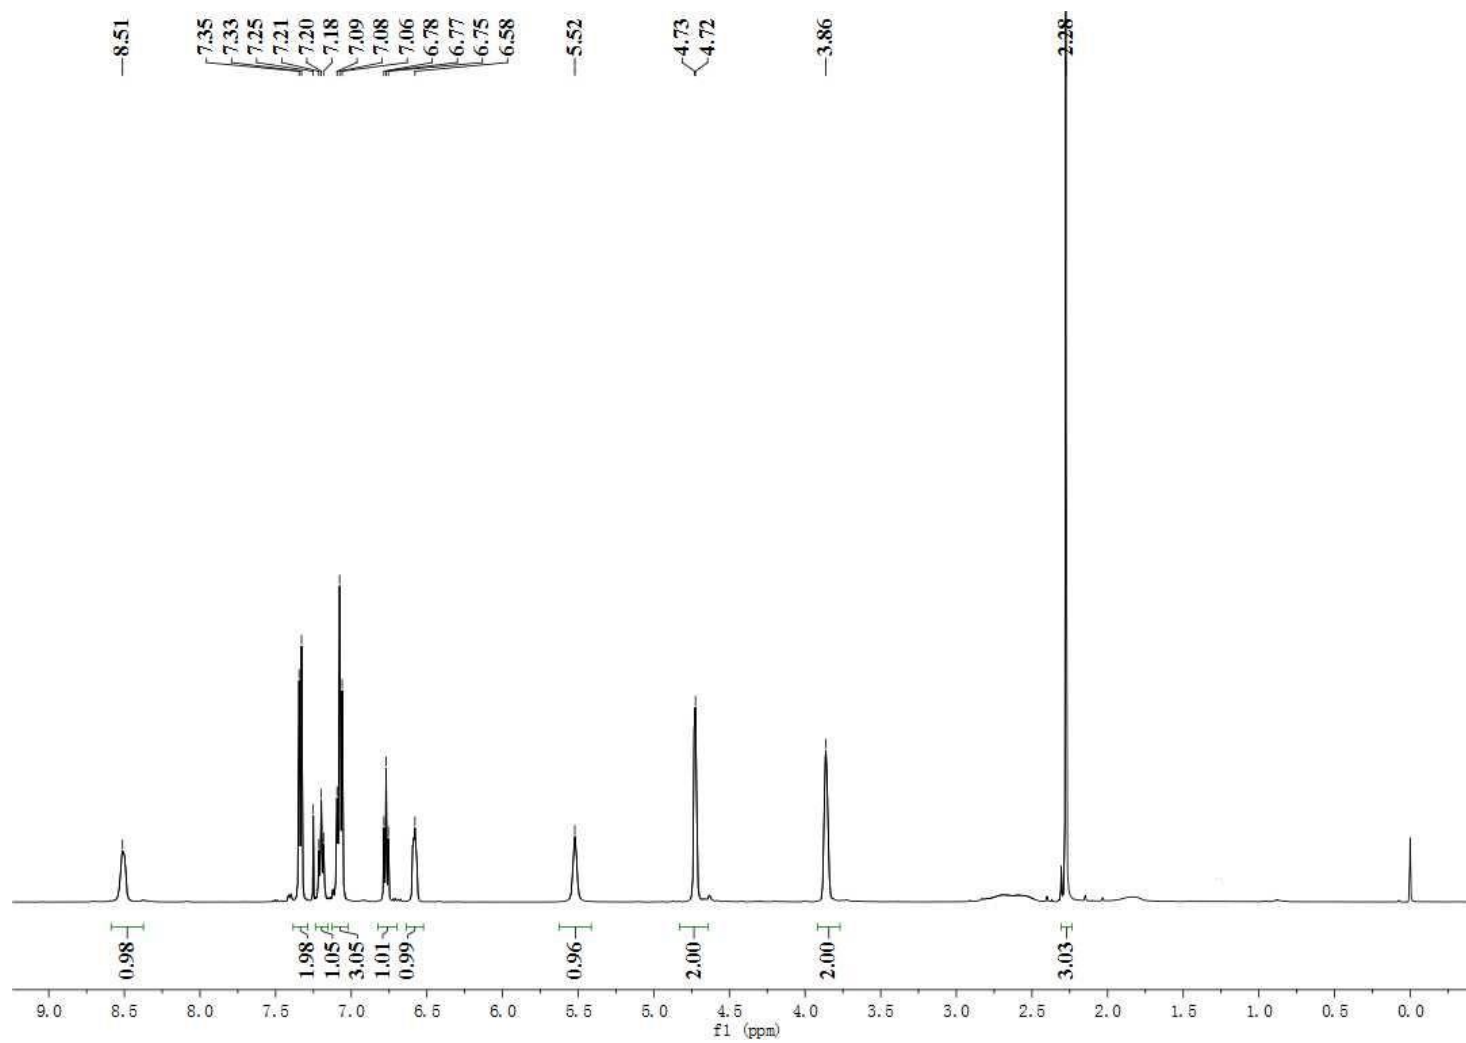

<sup>1</sup>H NMR of compound **3b**

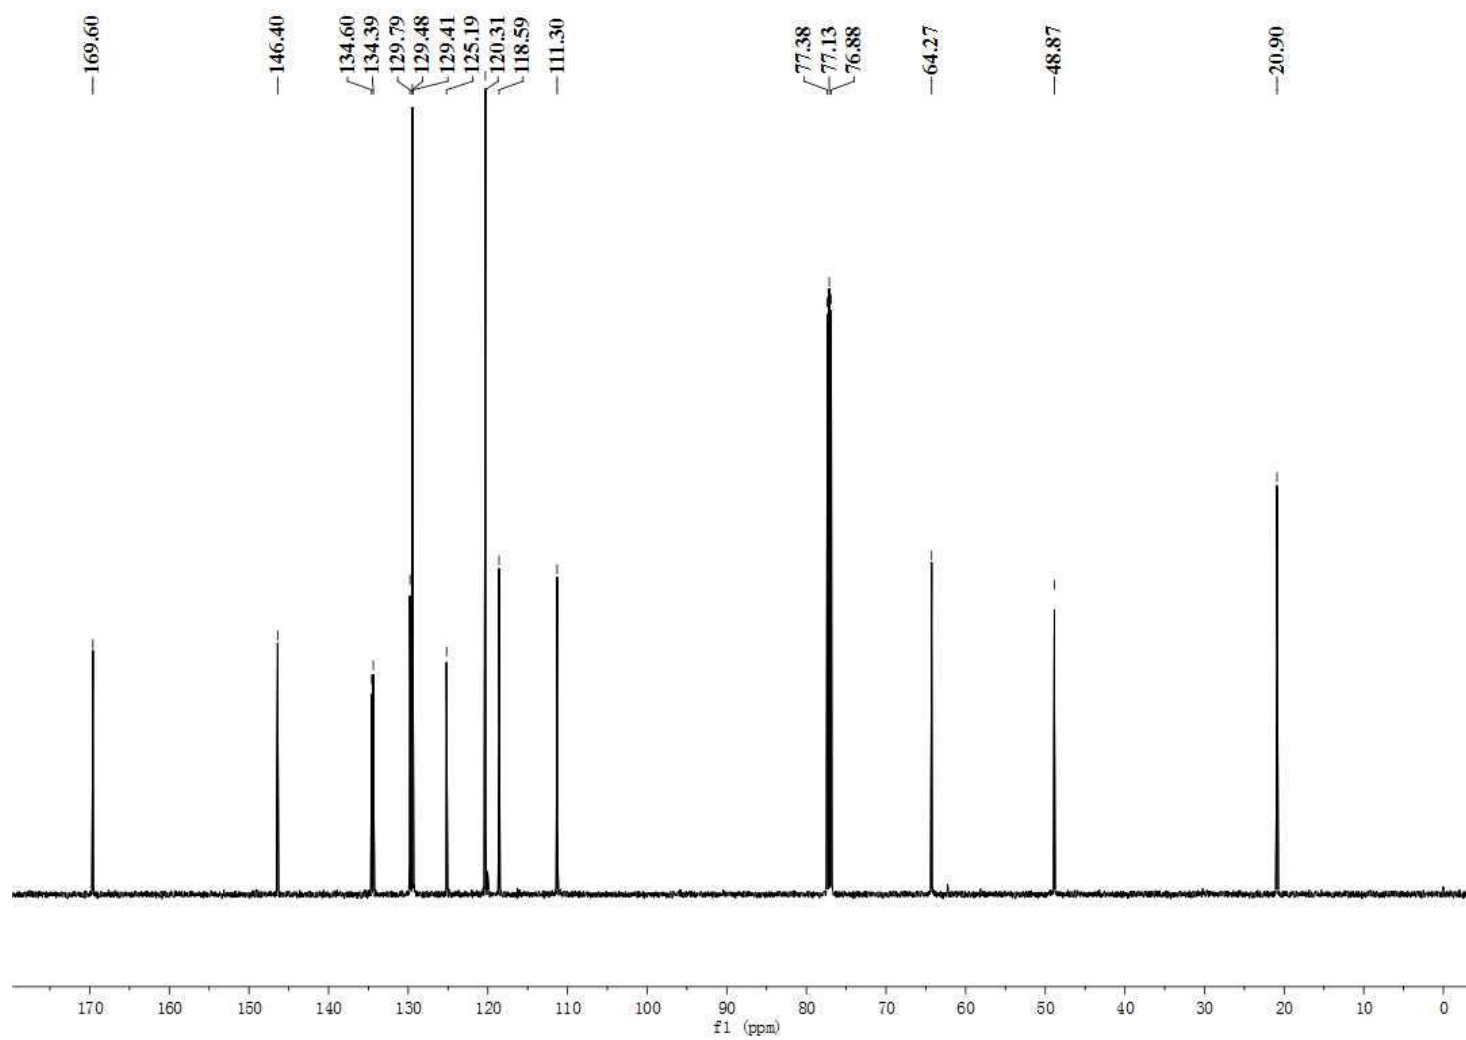

$^{13}\text{C}$  NMR of compound **3b**

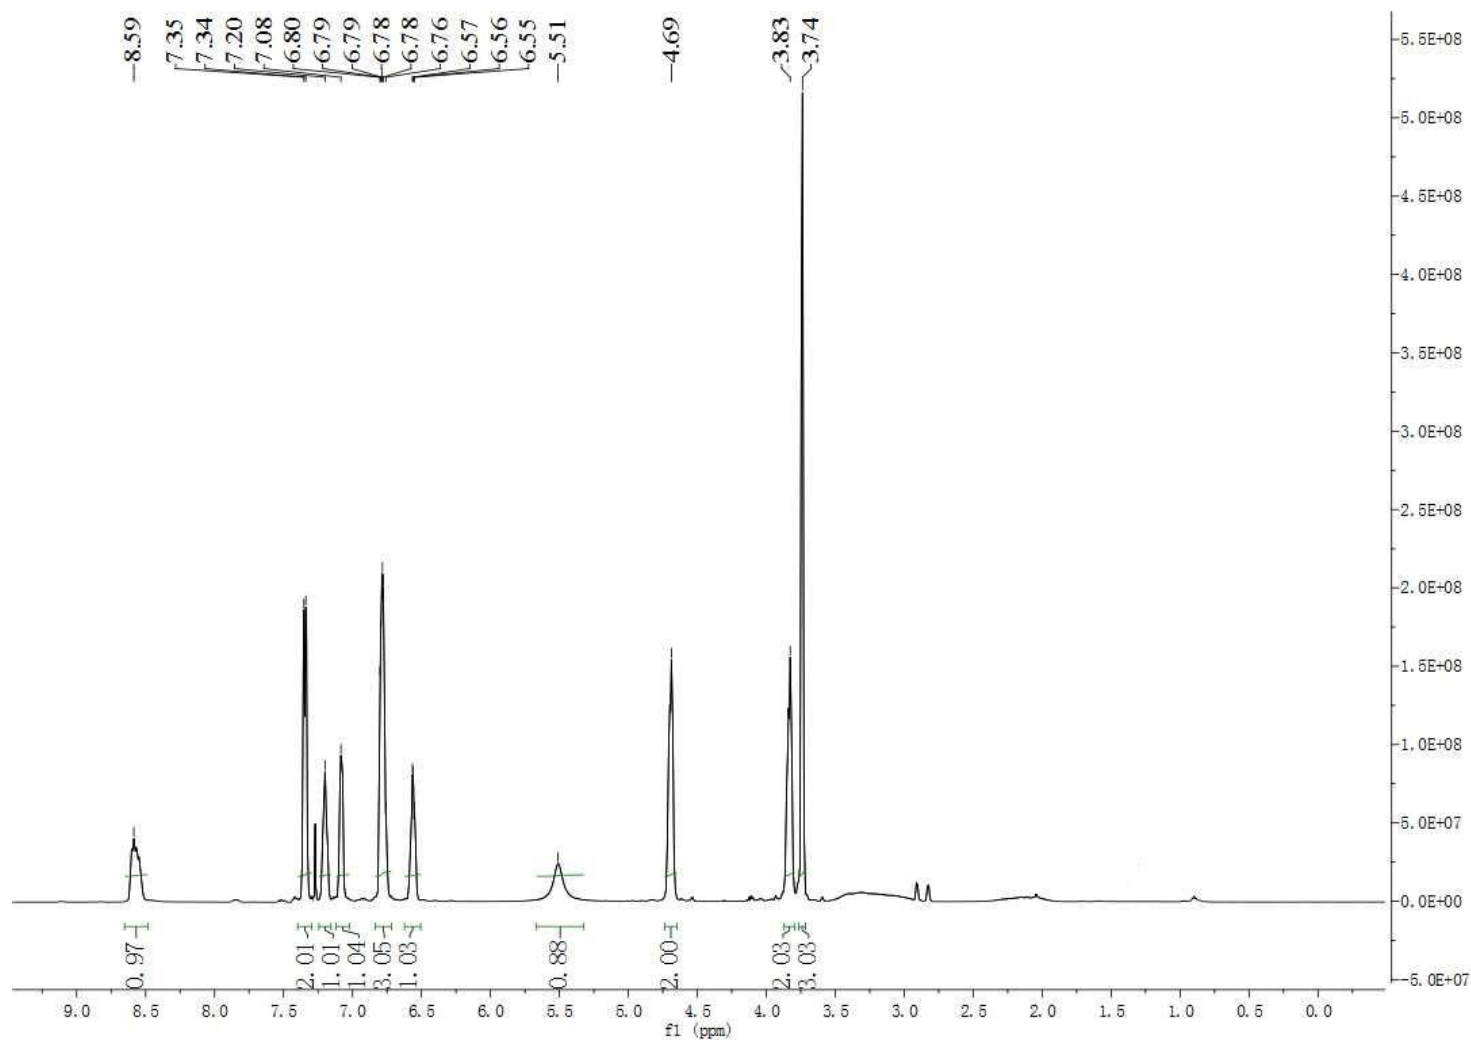

<sup>1</sup>H NMR of compound **3c**

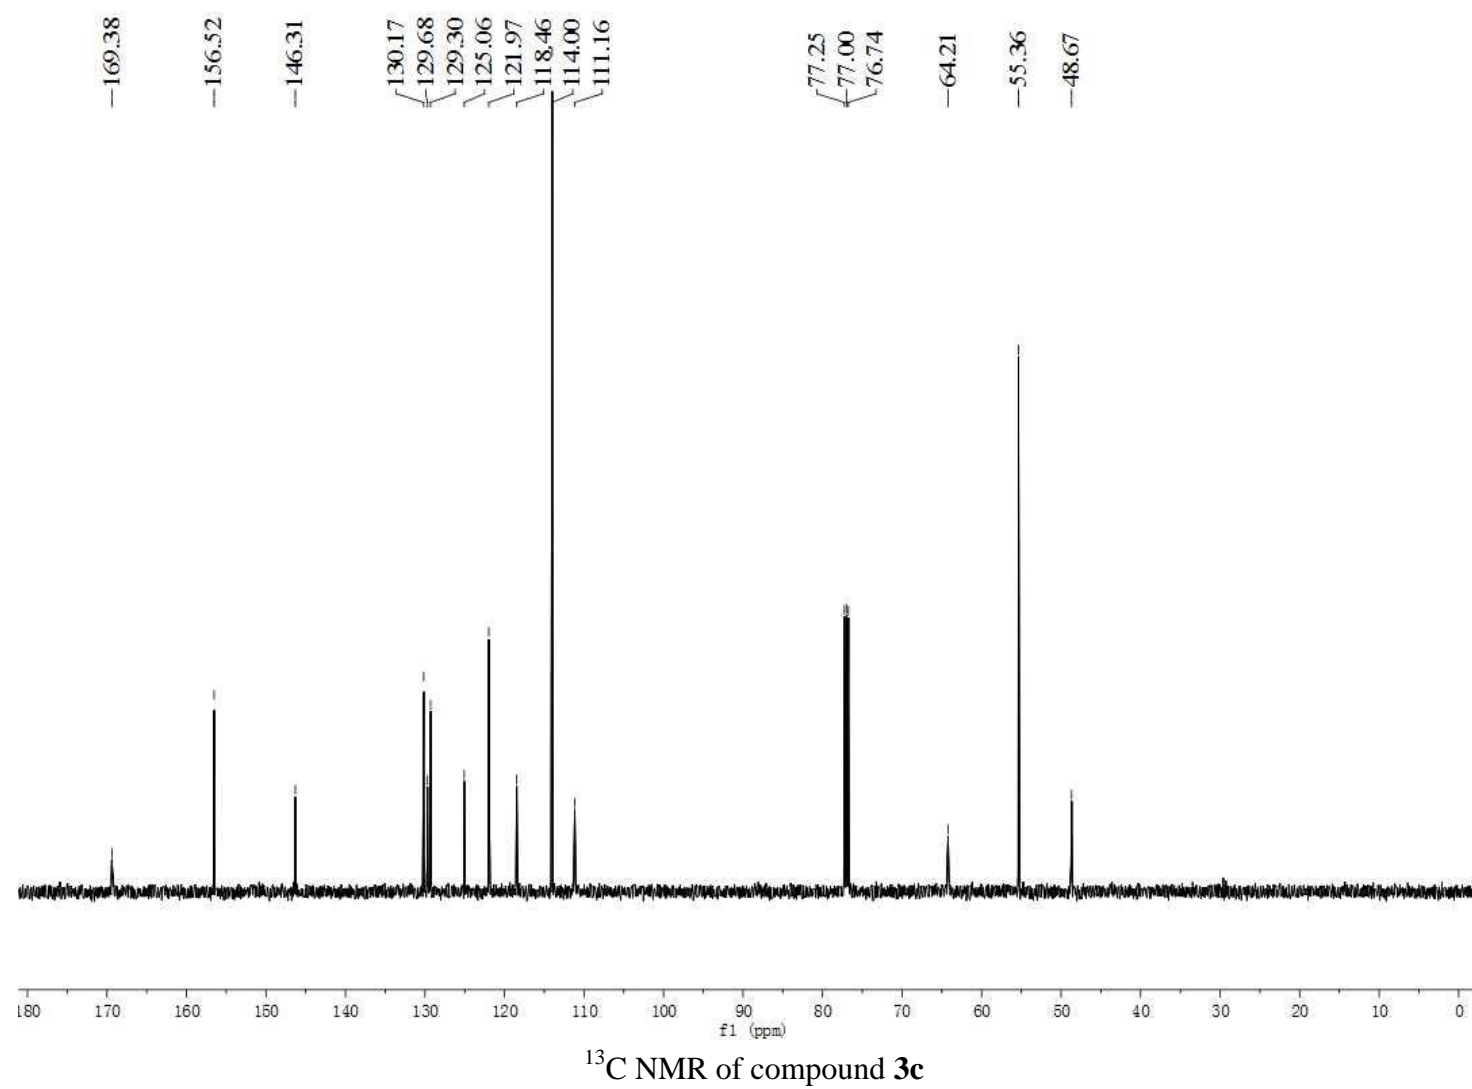

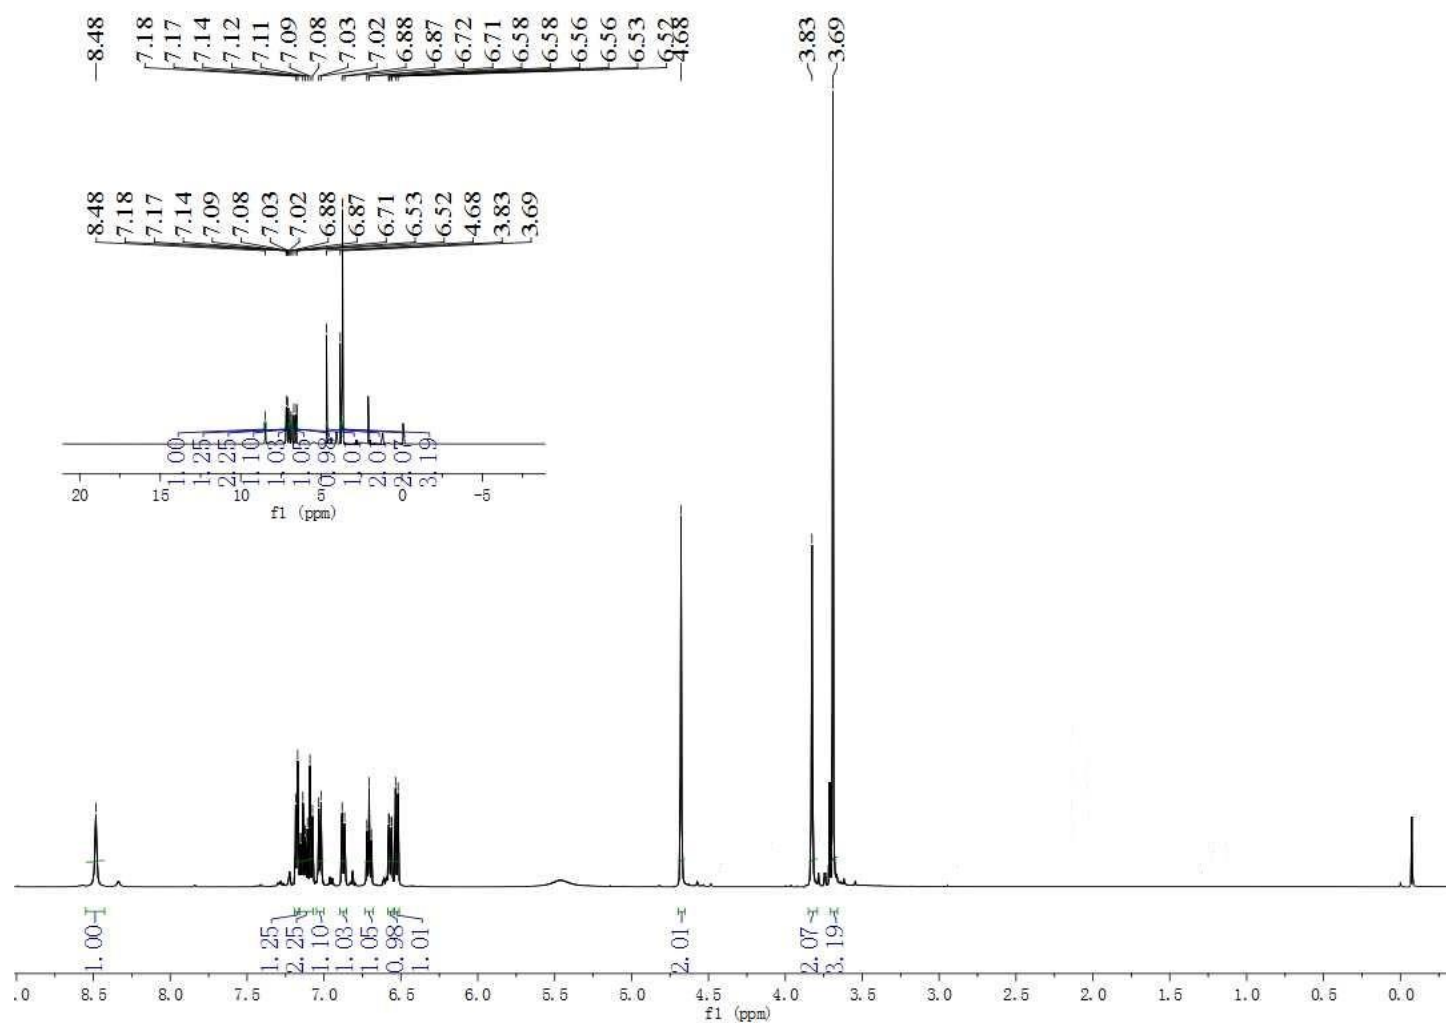

<sup>1</sup>H NMR of compound **3d**



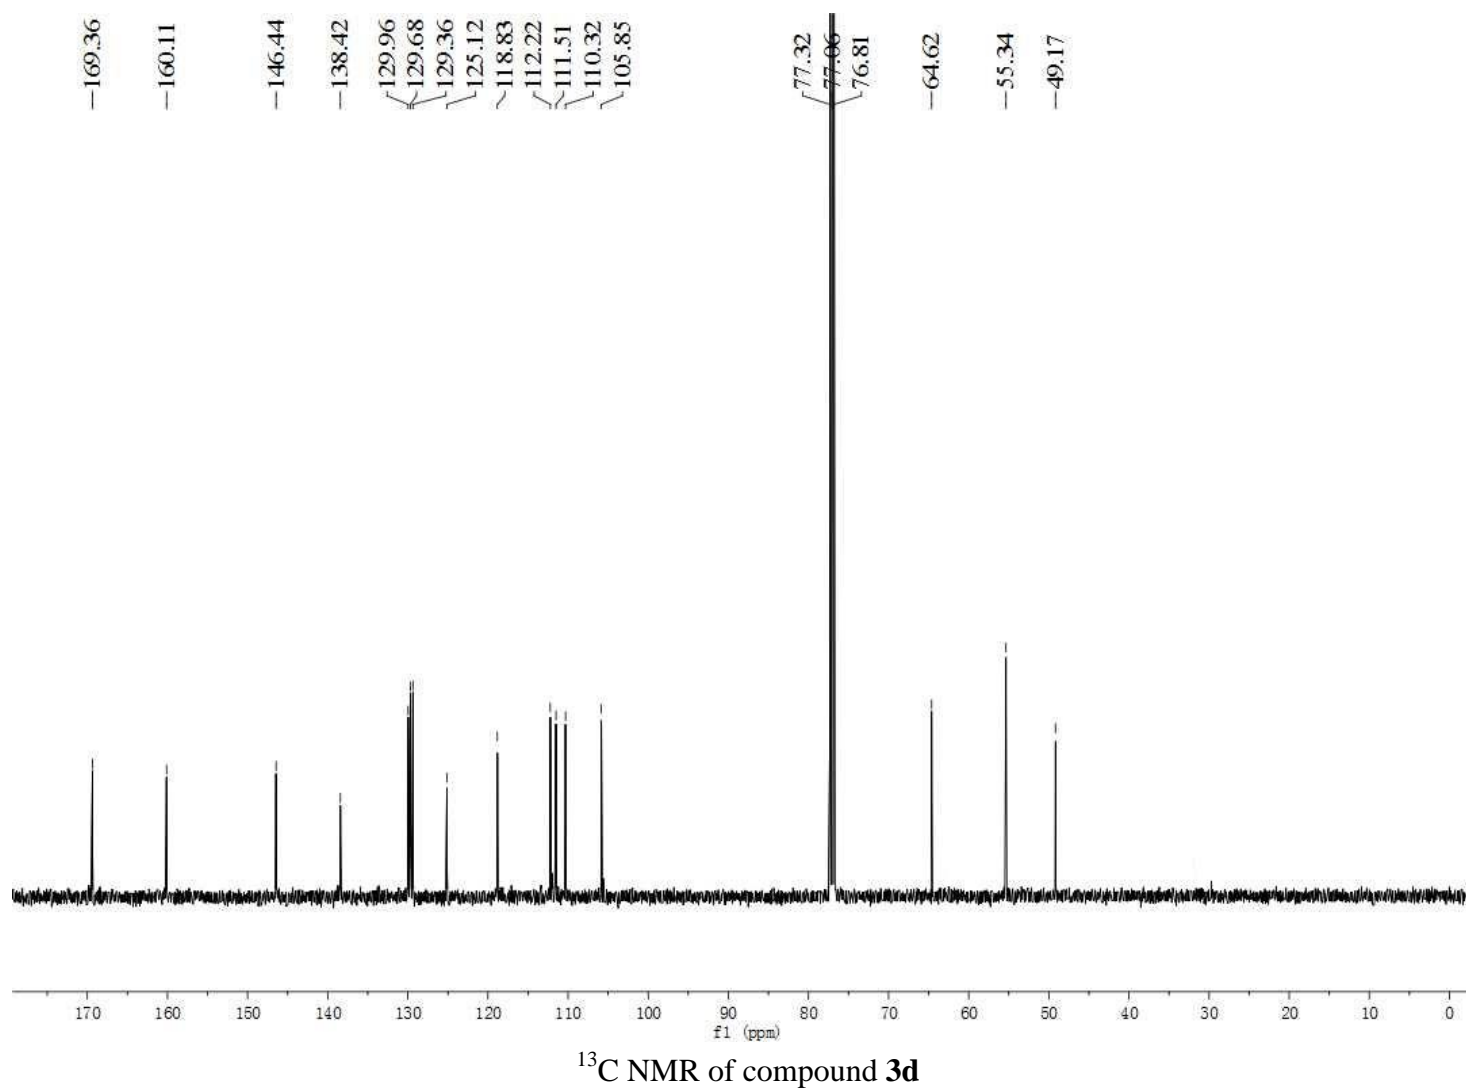

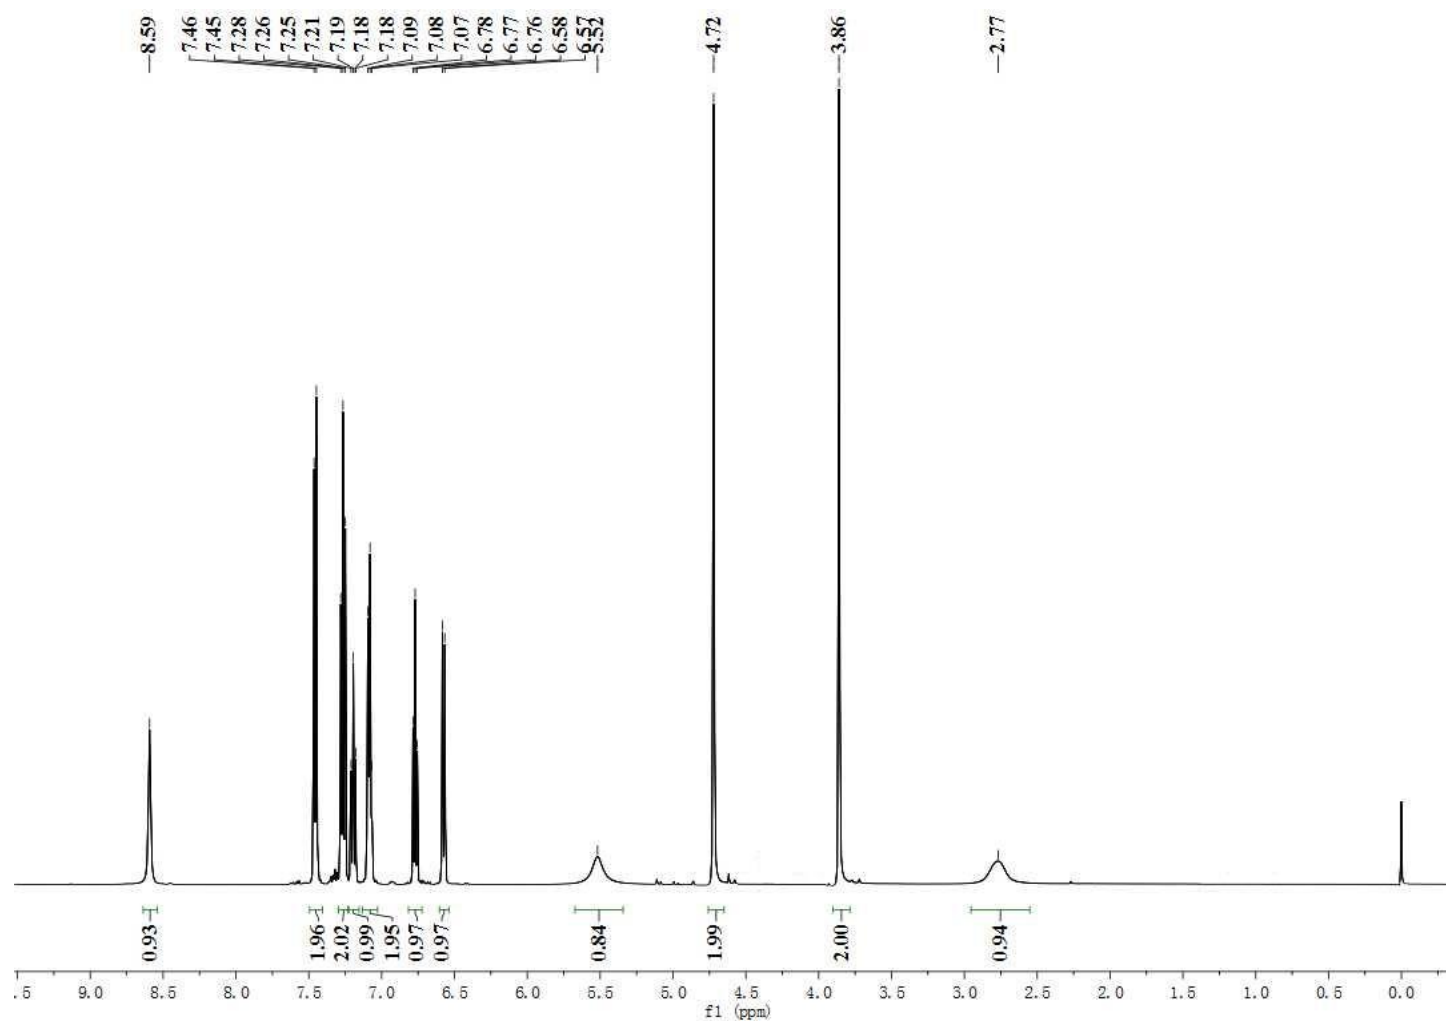

<sup>1</sup>H NMR of compound **3e**

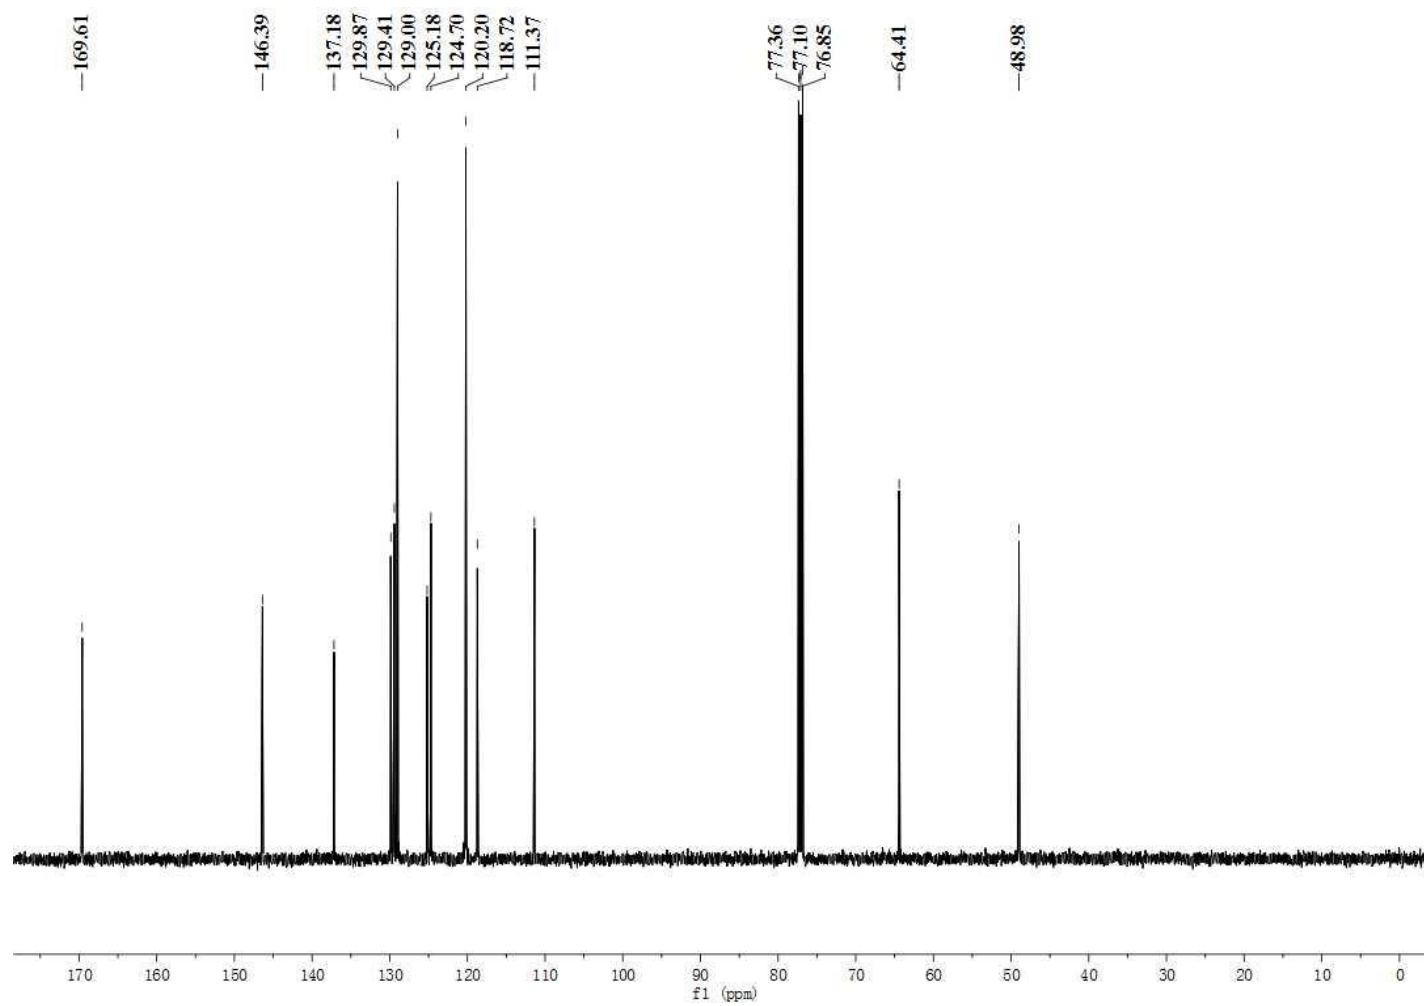

$^{13}\text{C}$  NMR of compound **3e**

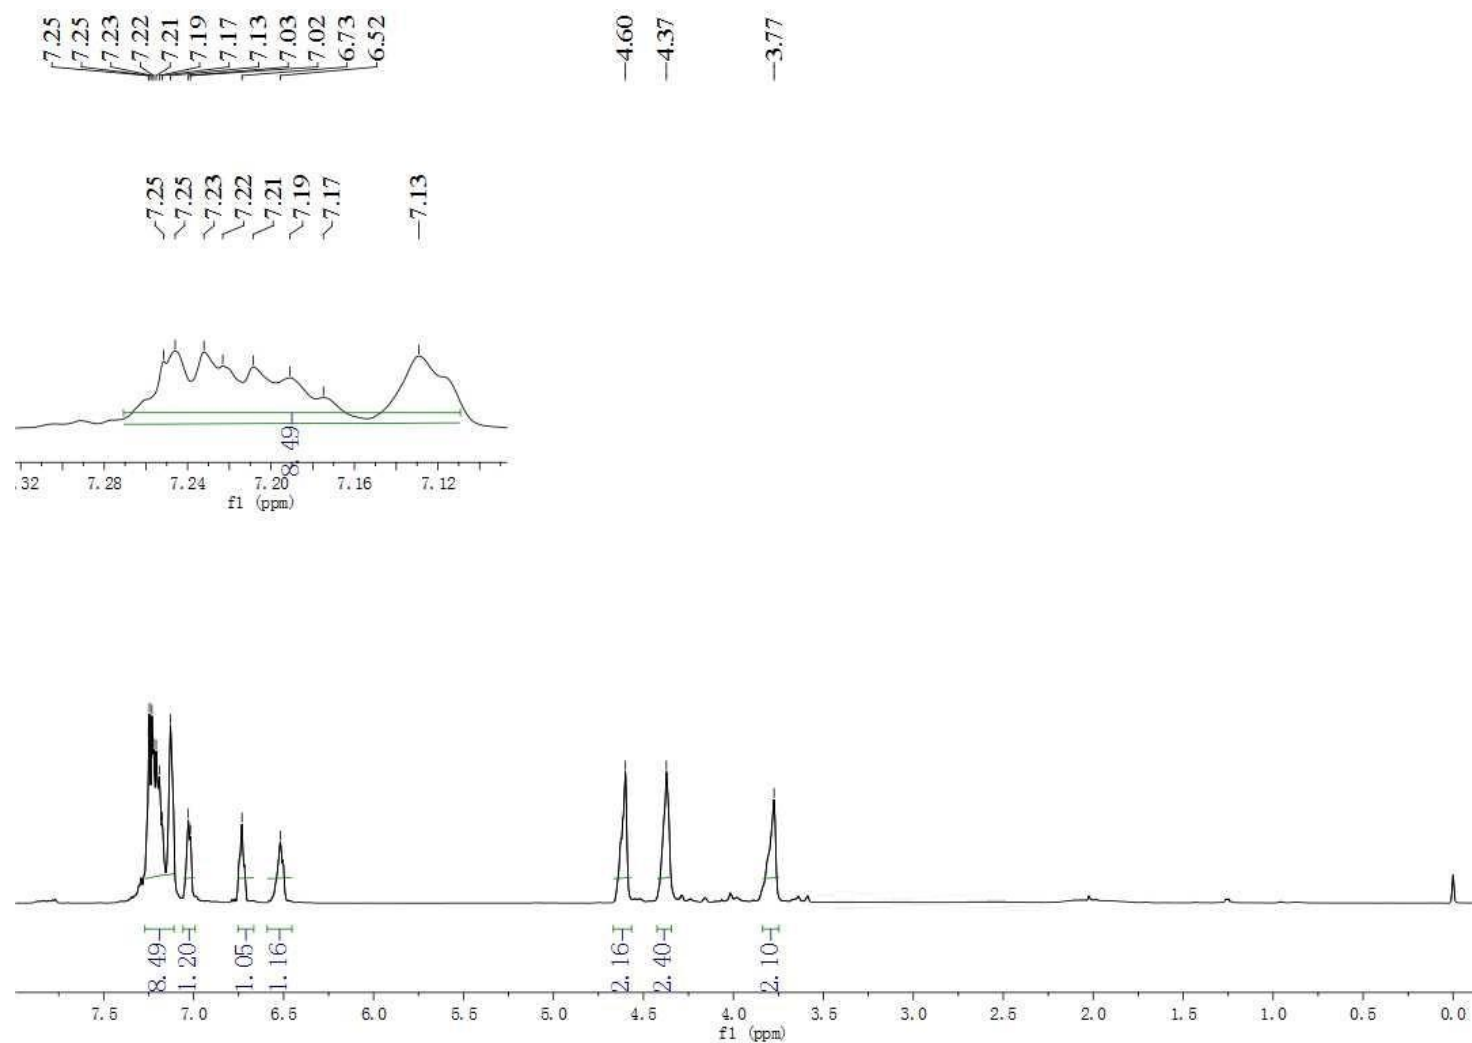

$^1\text{H}$  NMR of compound **3f**

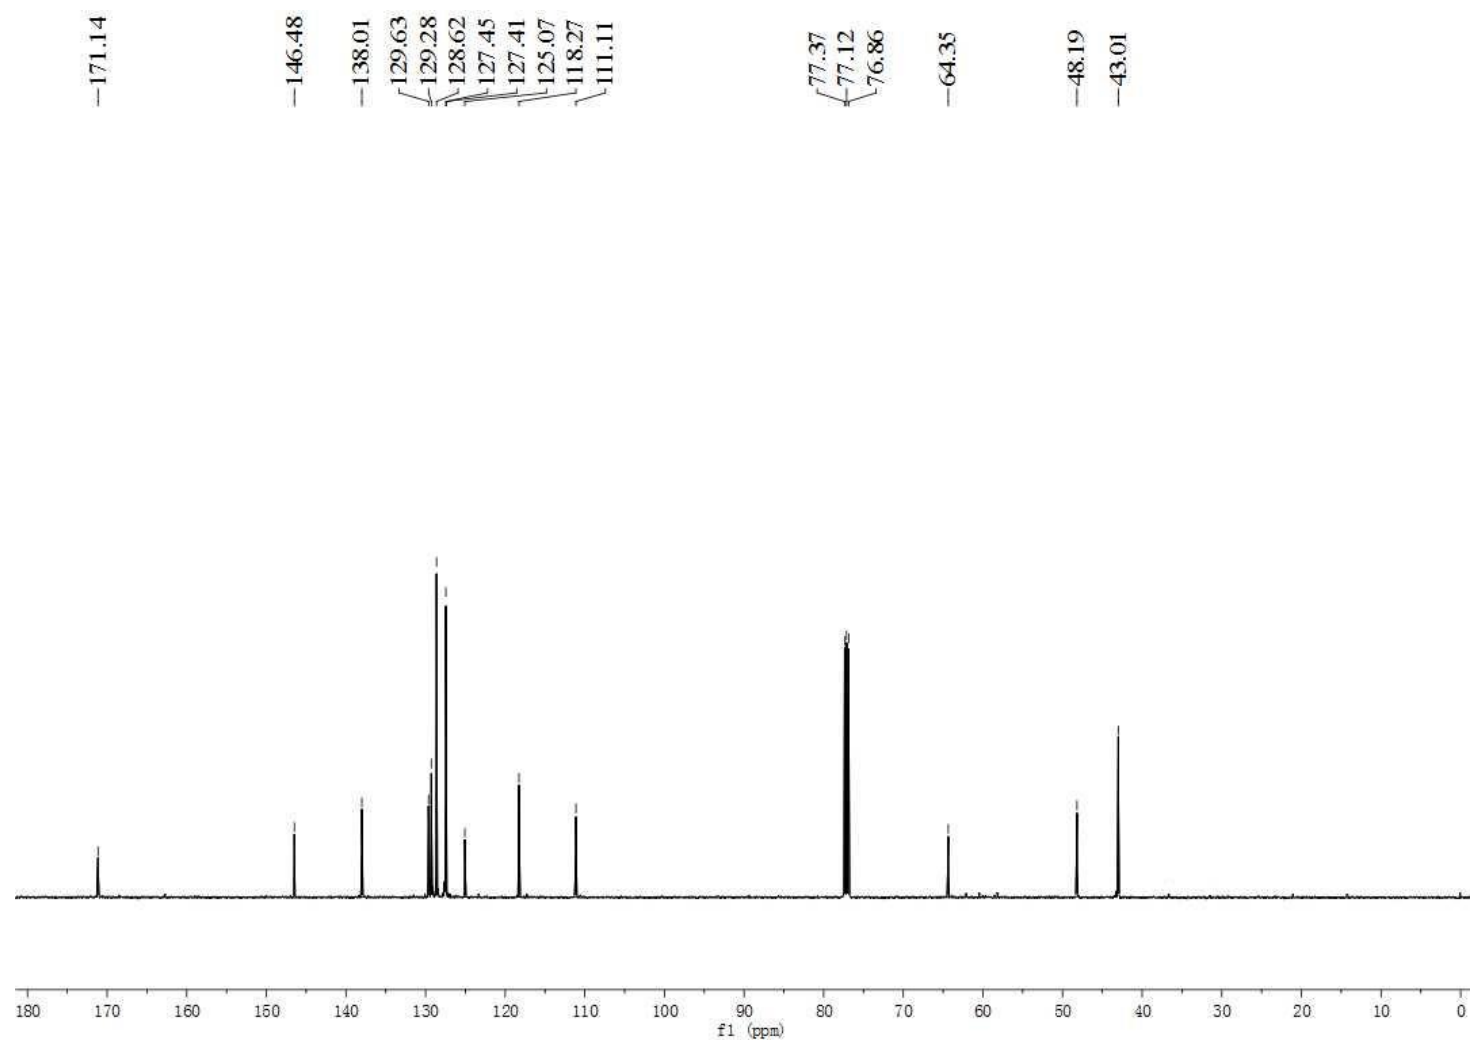

$^{13}\text{C}$  NMR of compound **3f**

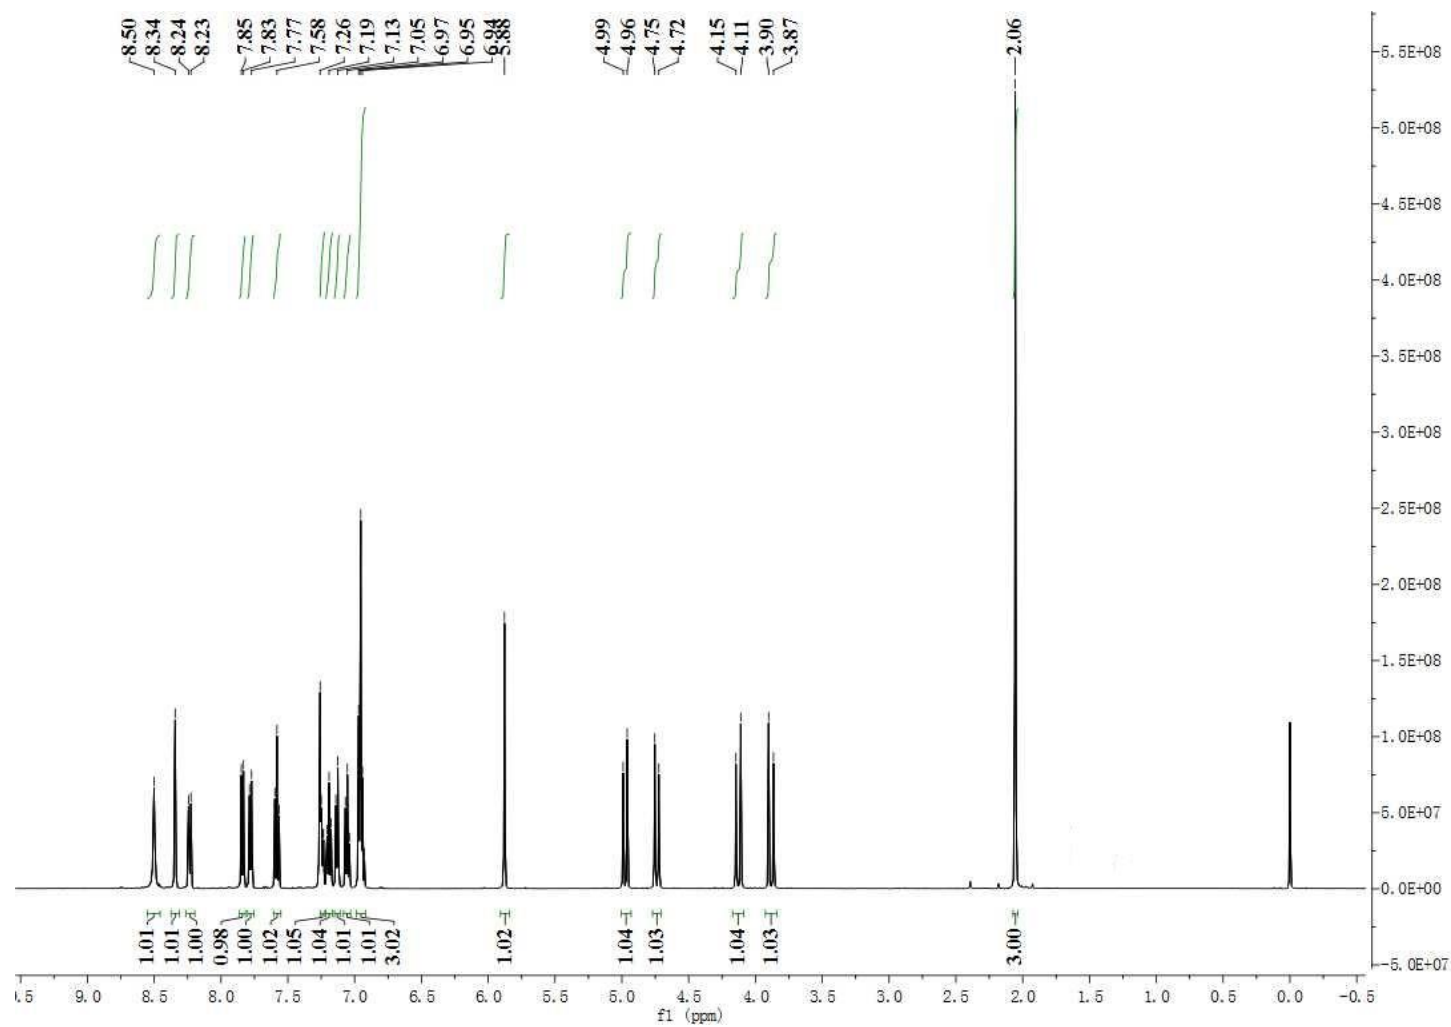

$^1\text{H}$  NMR of compound **5a**

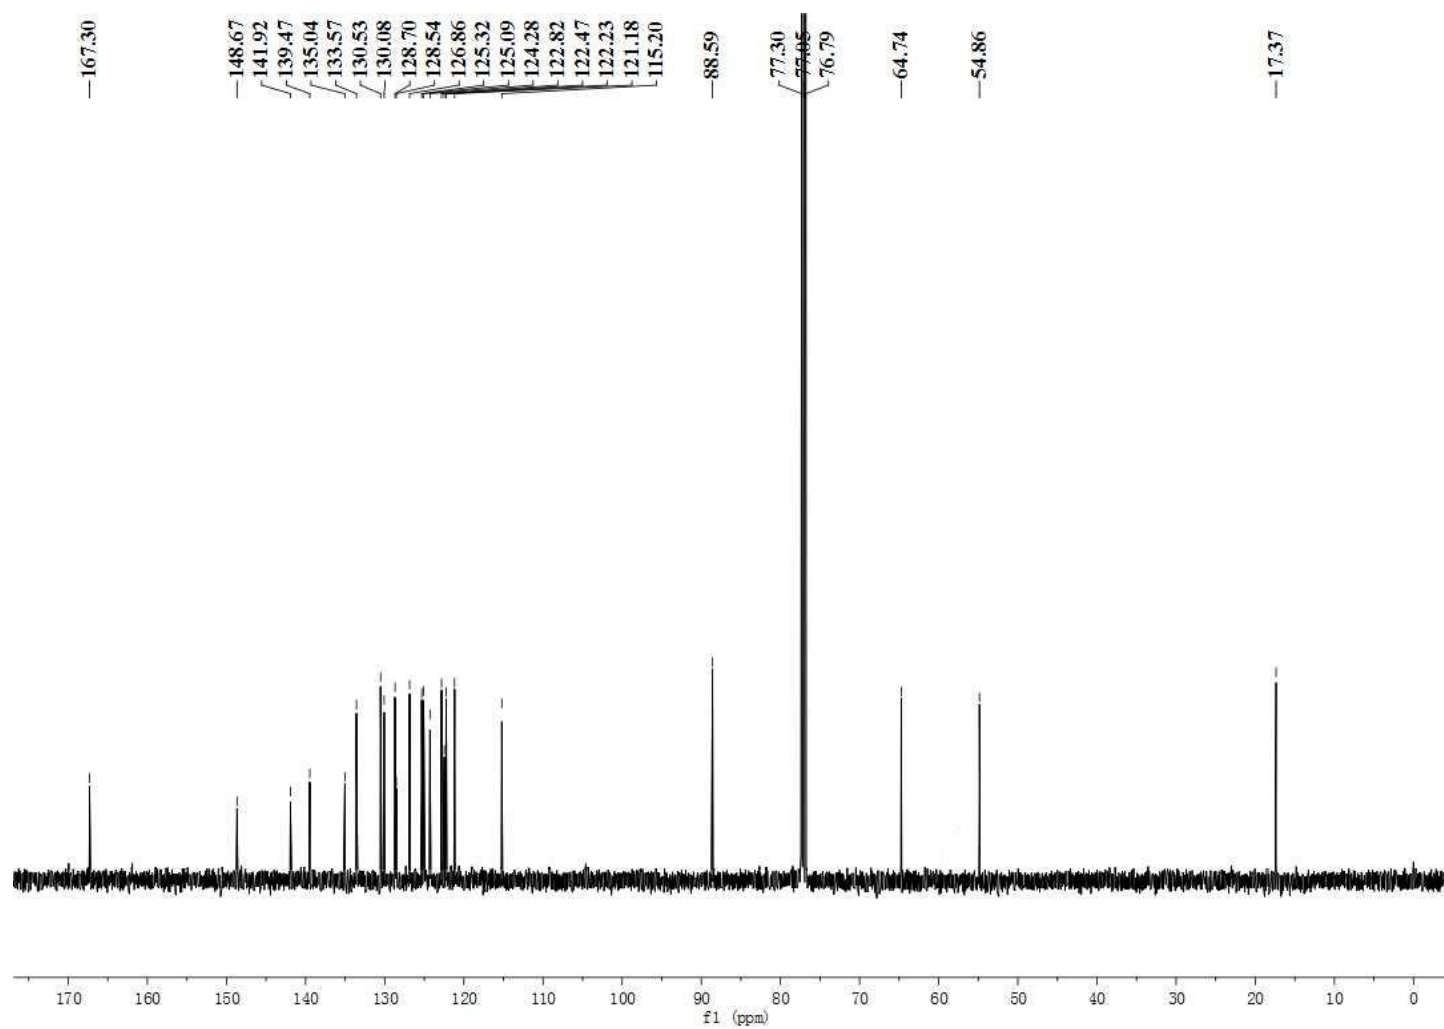

$^{13}\text{C}$  NMR of compound **5a**

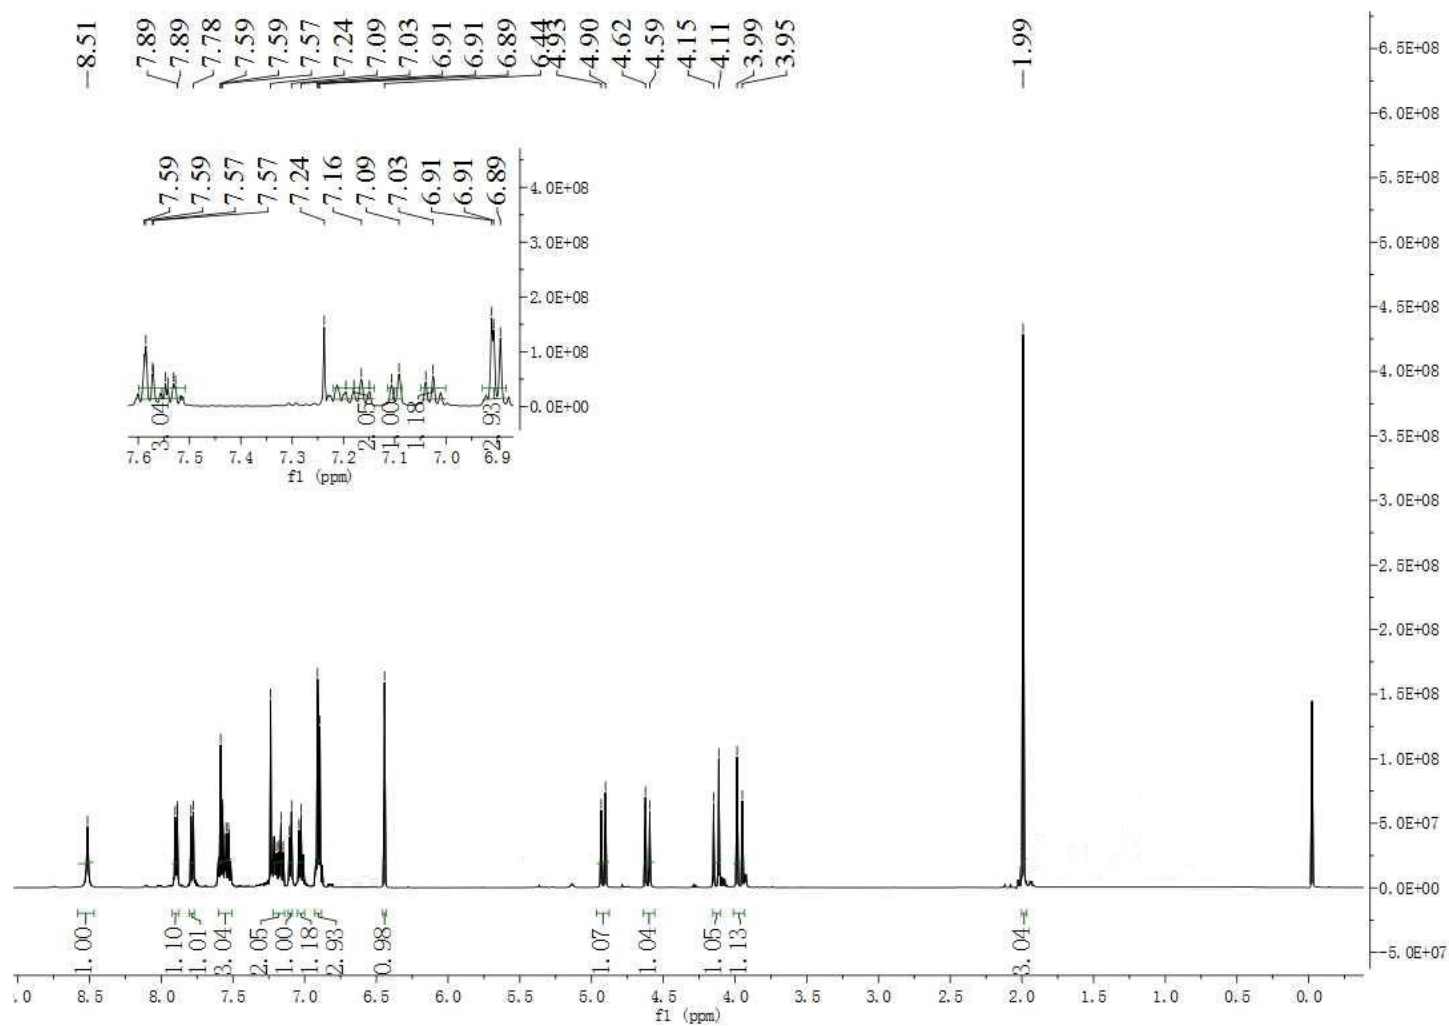

<sup>1</sup>H NMR of compound **5b**



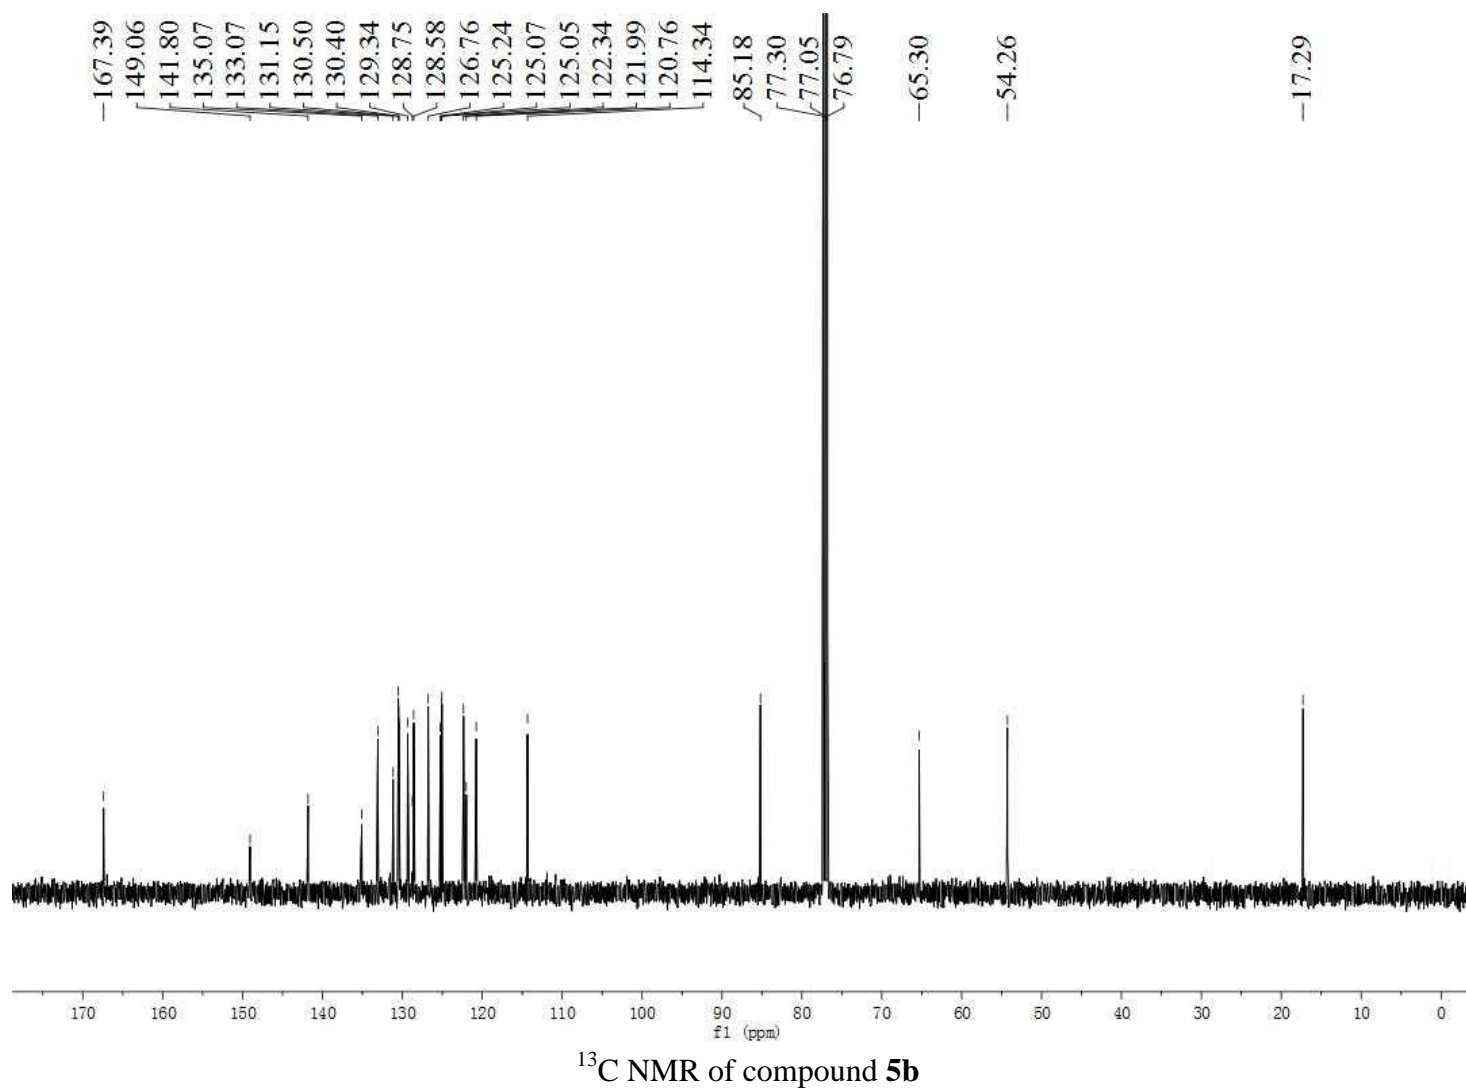

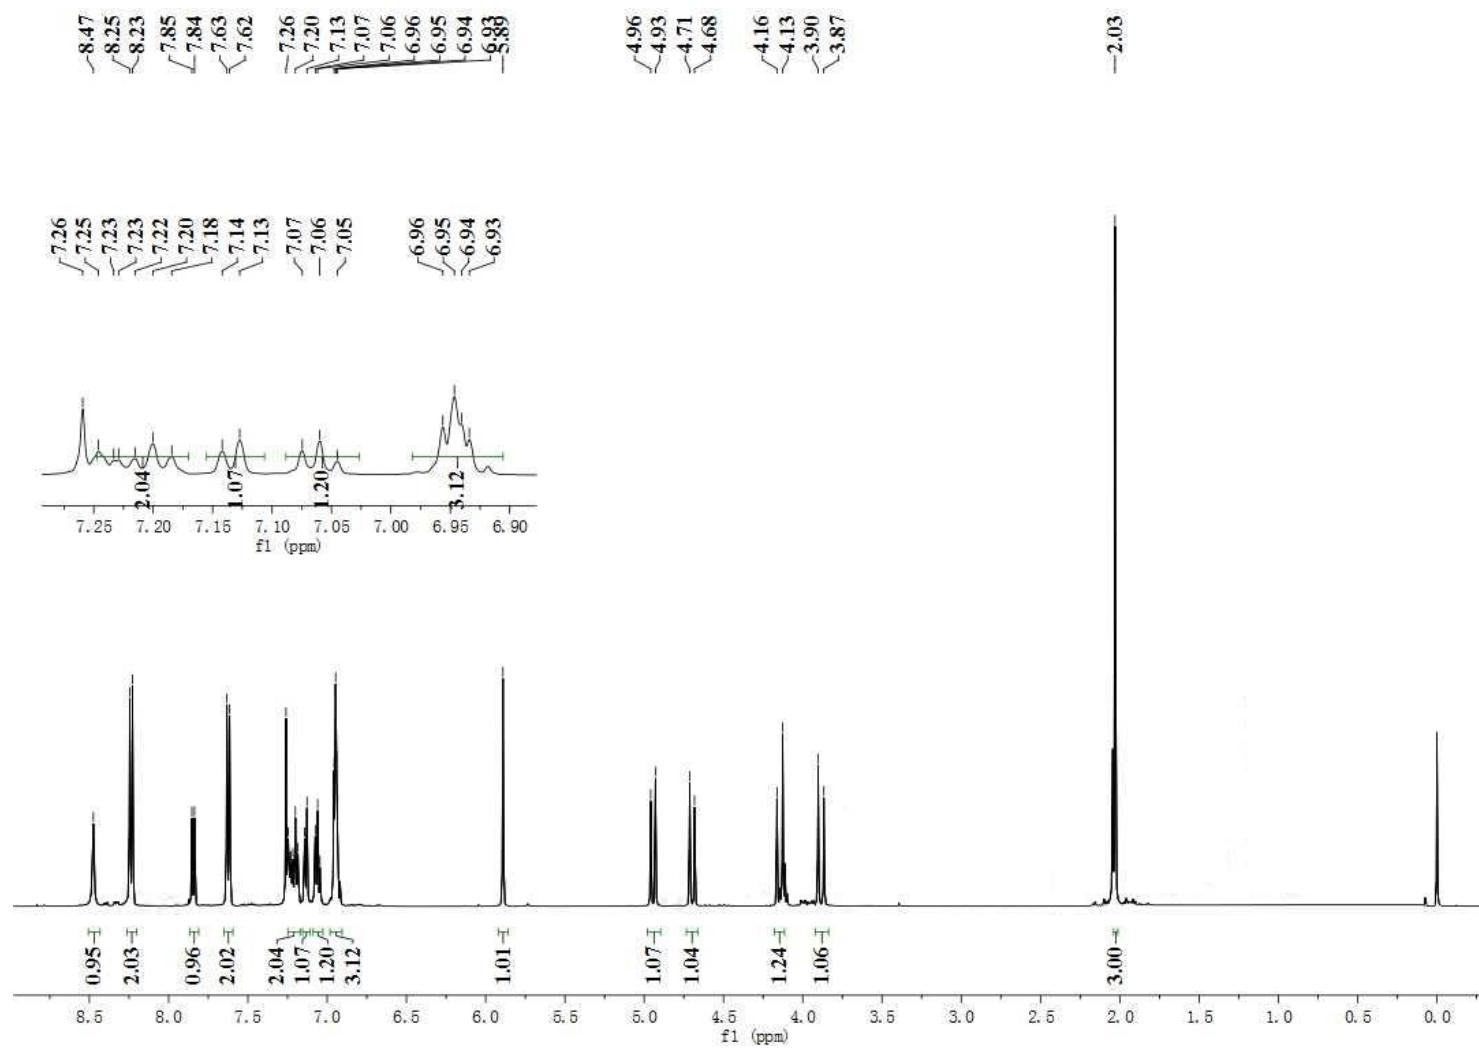

$^1\text{H}$  NMR of compound **5c**

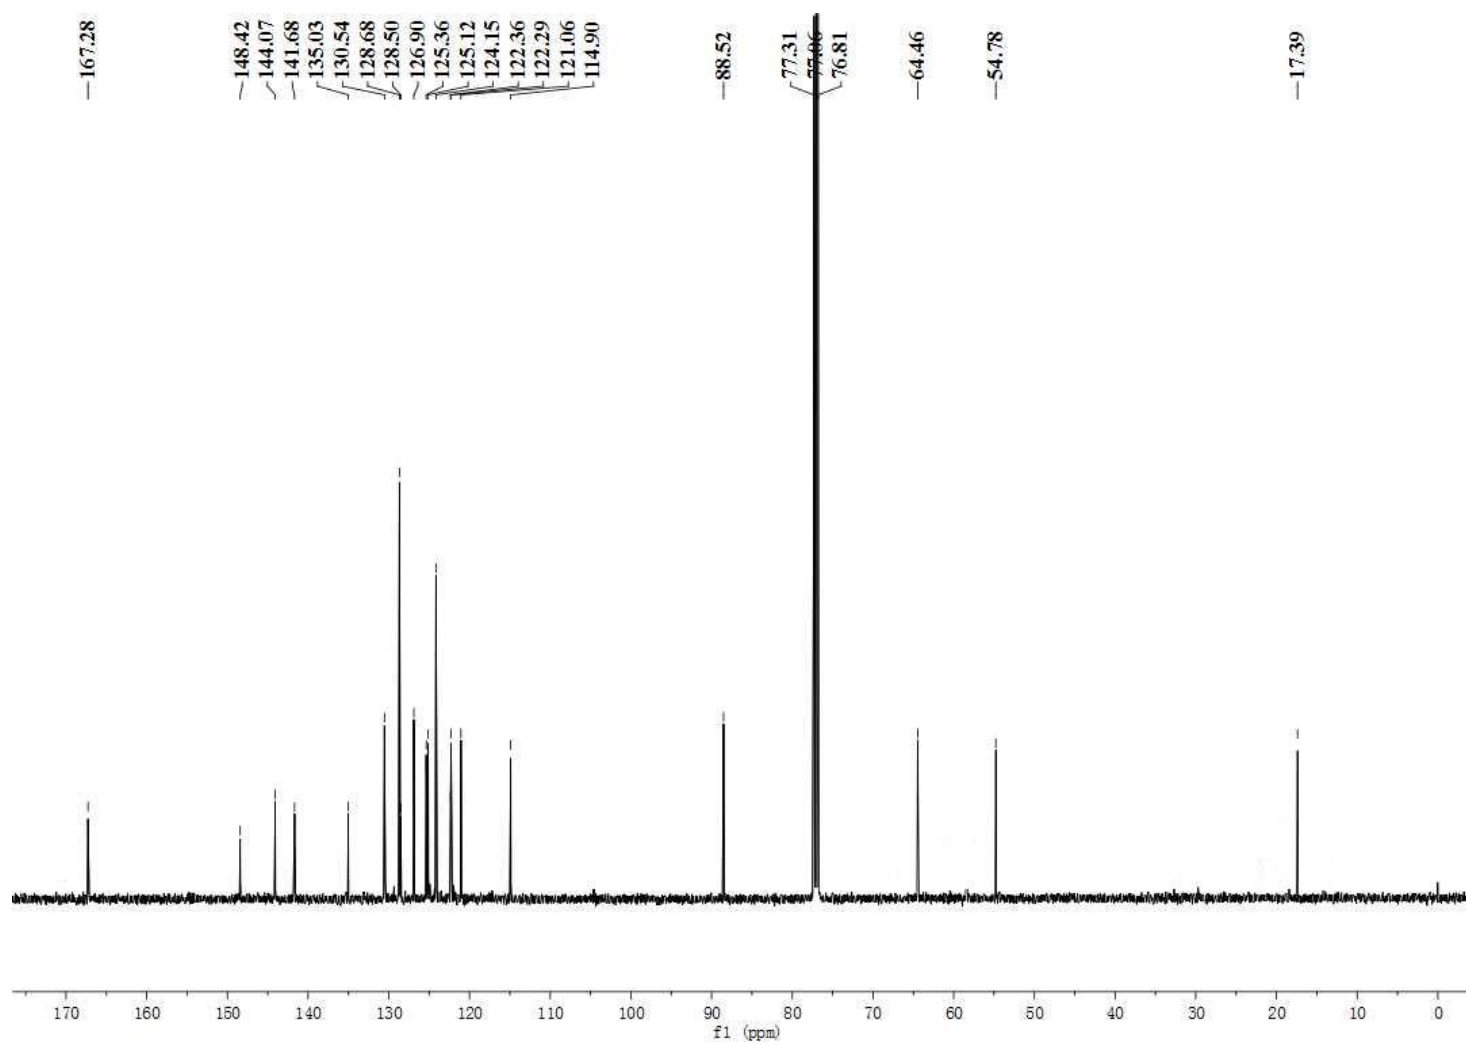

$^{13}\text{C}$  NMR of compound **5c**

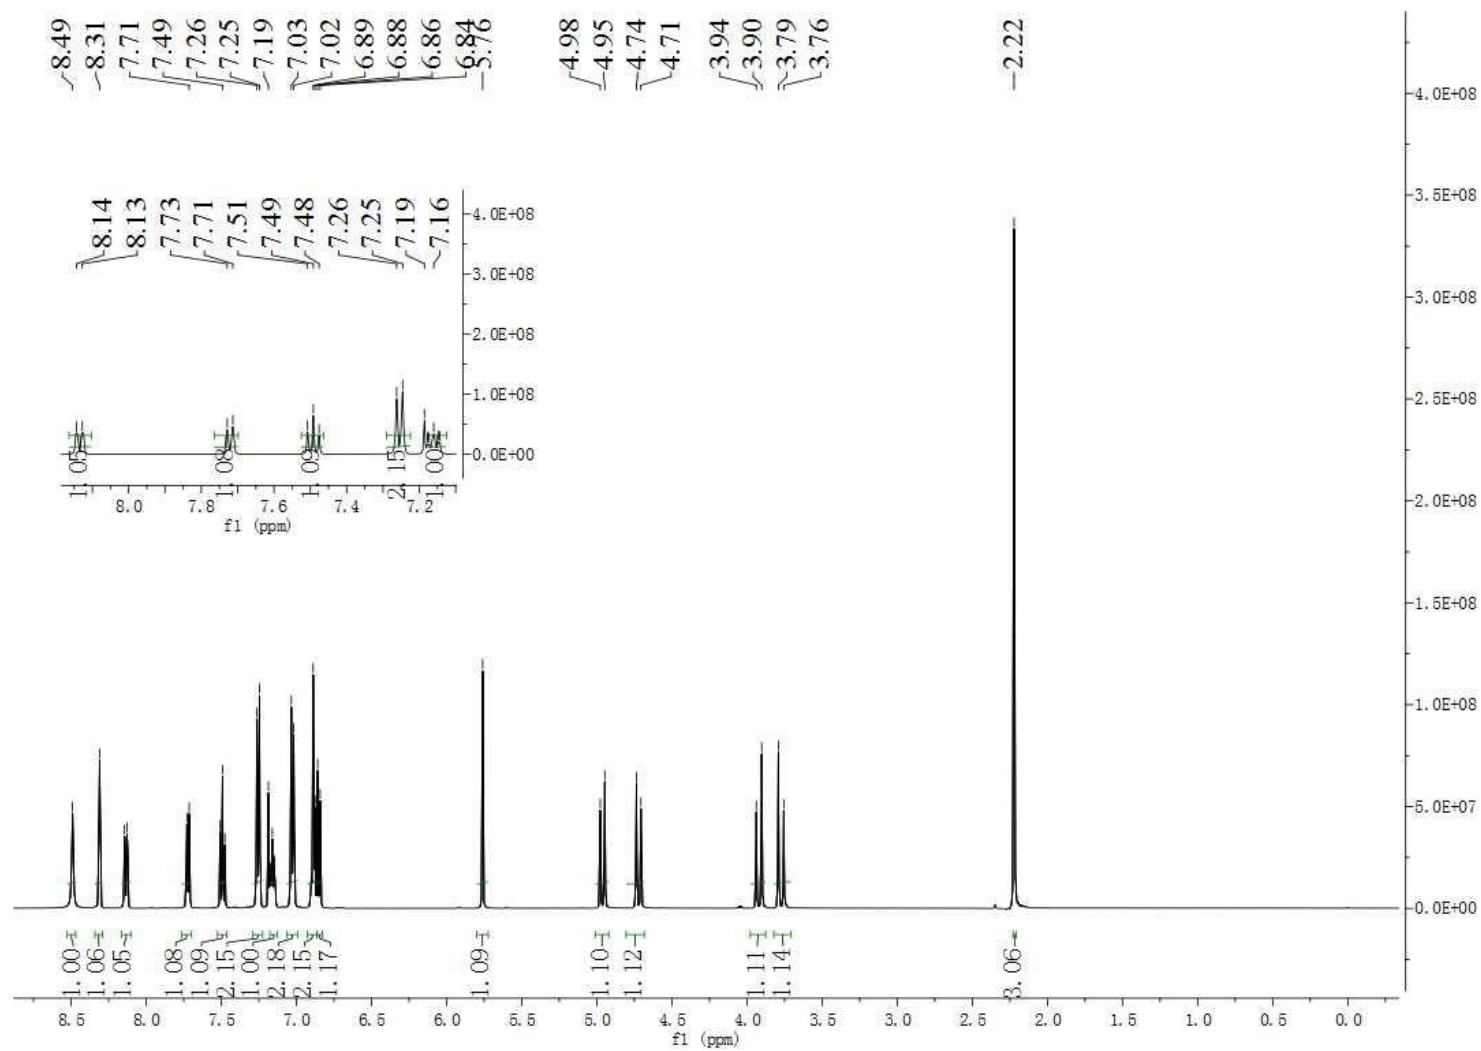

$^1\text{H}$  NMR of compound **5d**

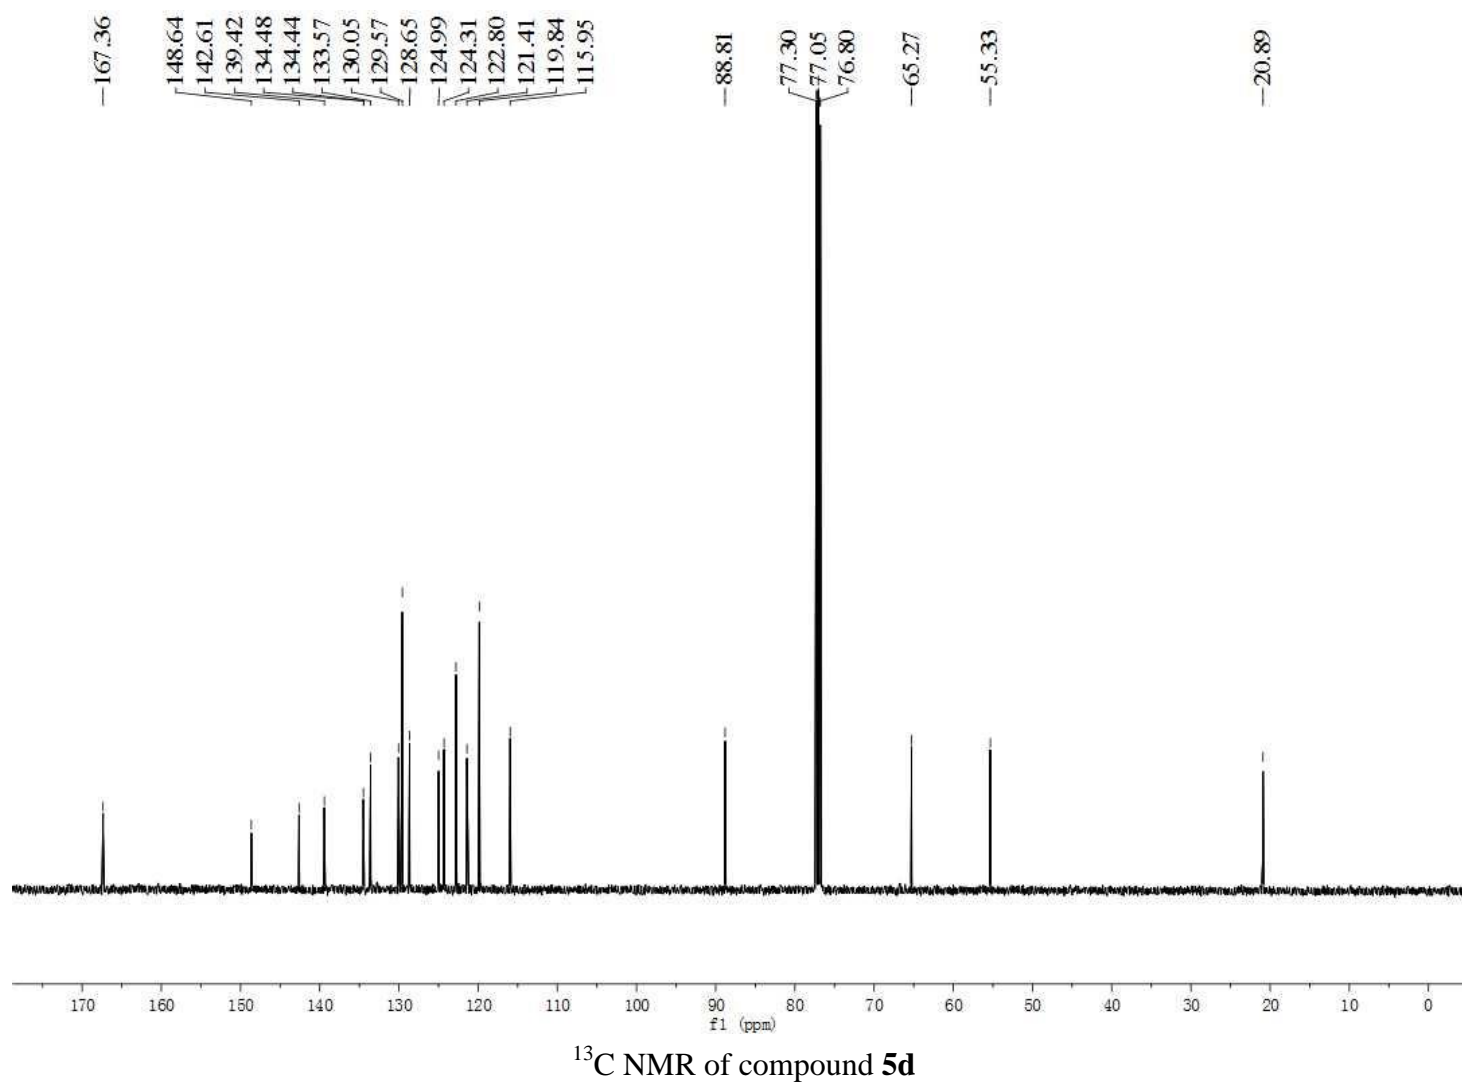

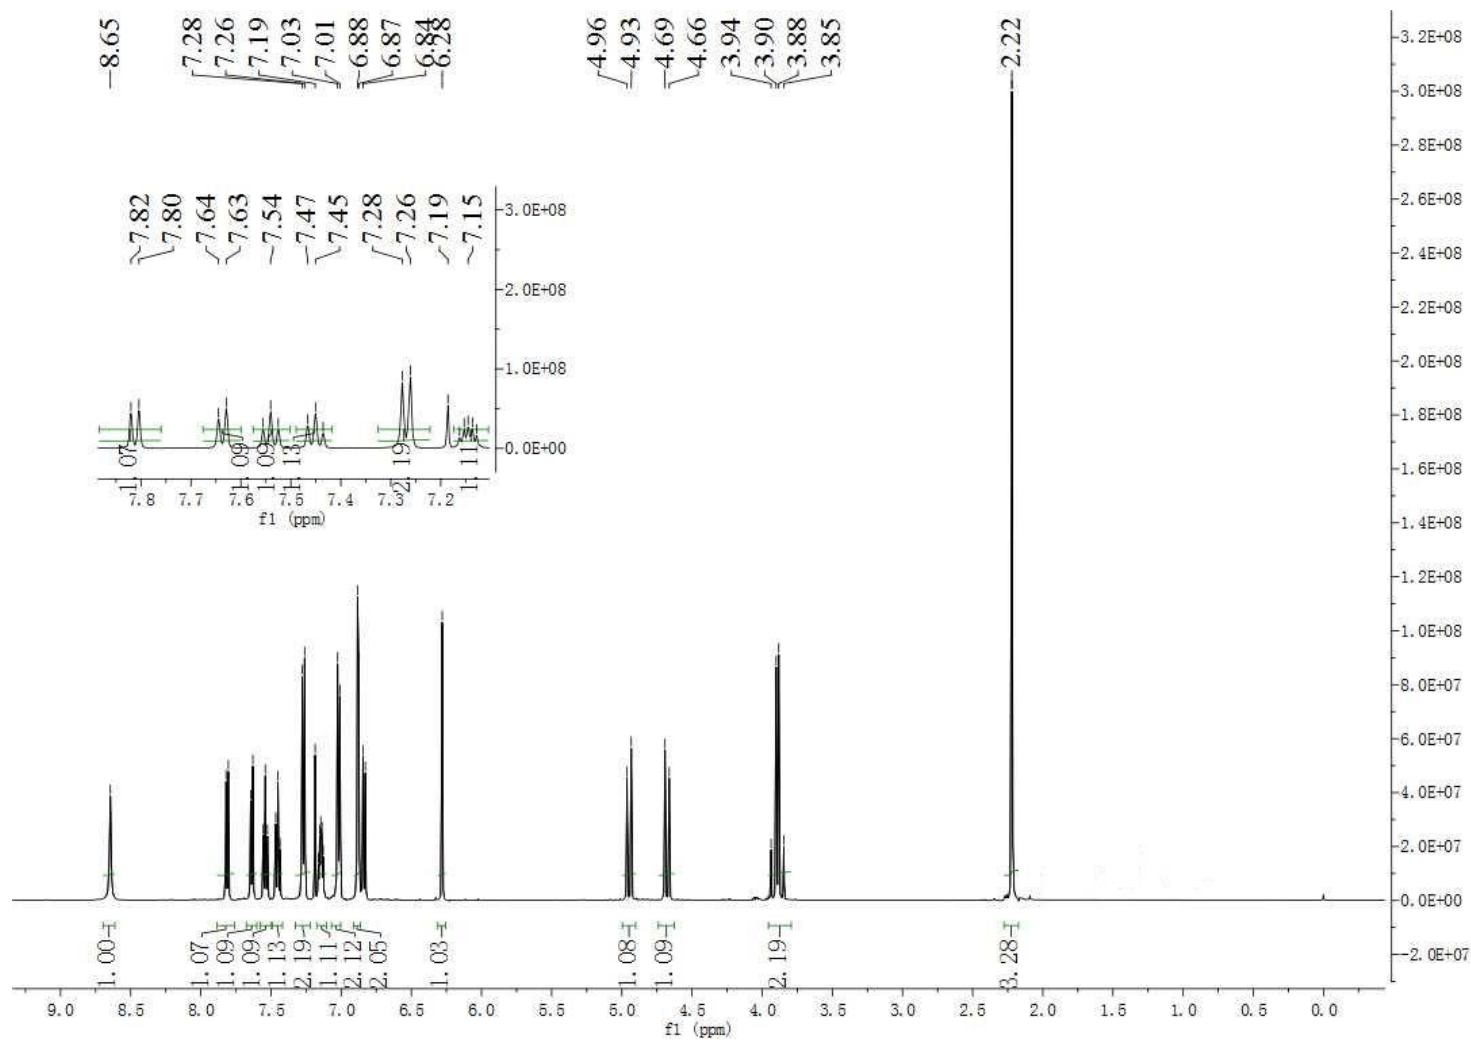

$^1\text{H}$  NMR of compound **5e**

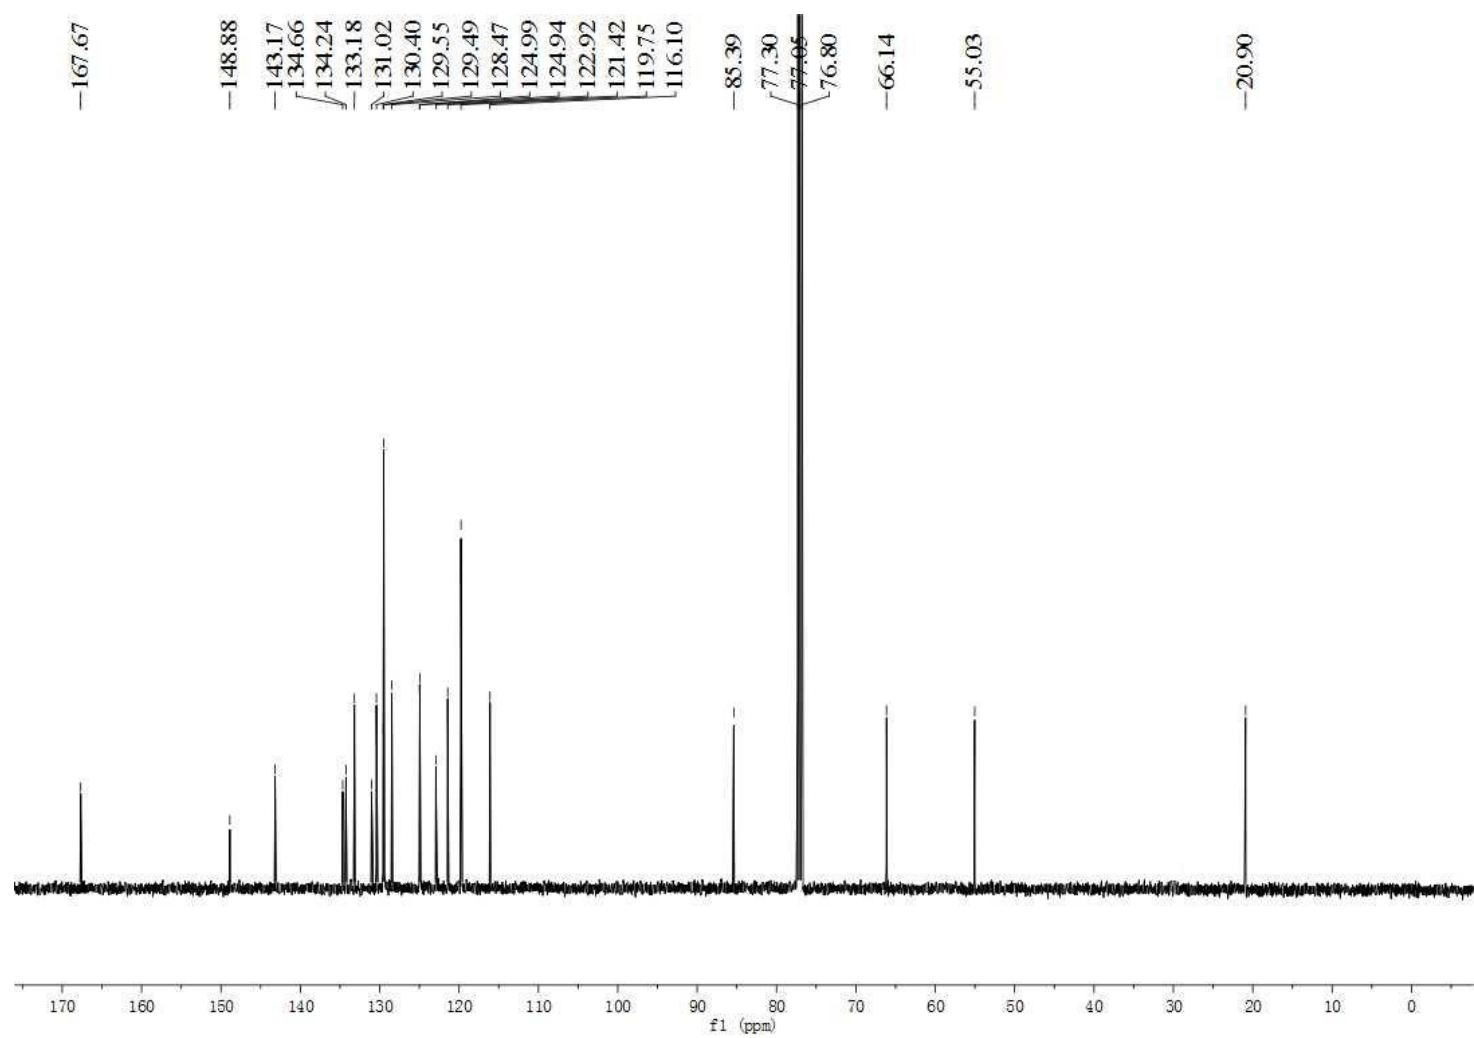

<sup>13</sup>C NMR of compound **5e**

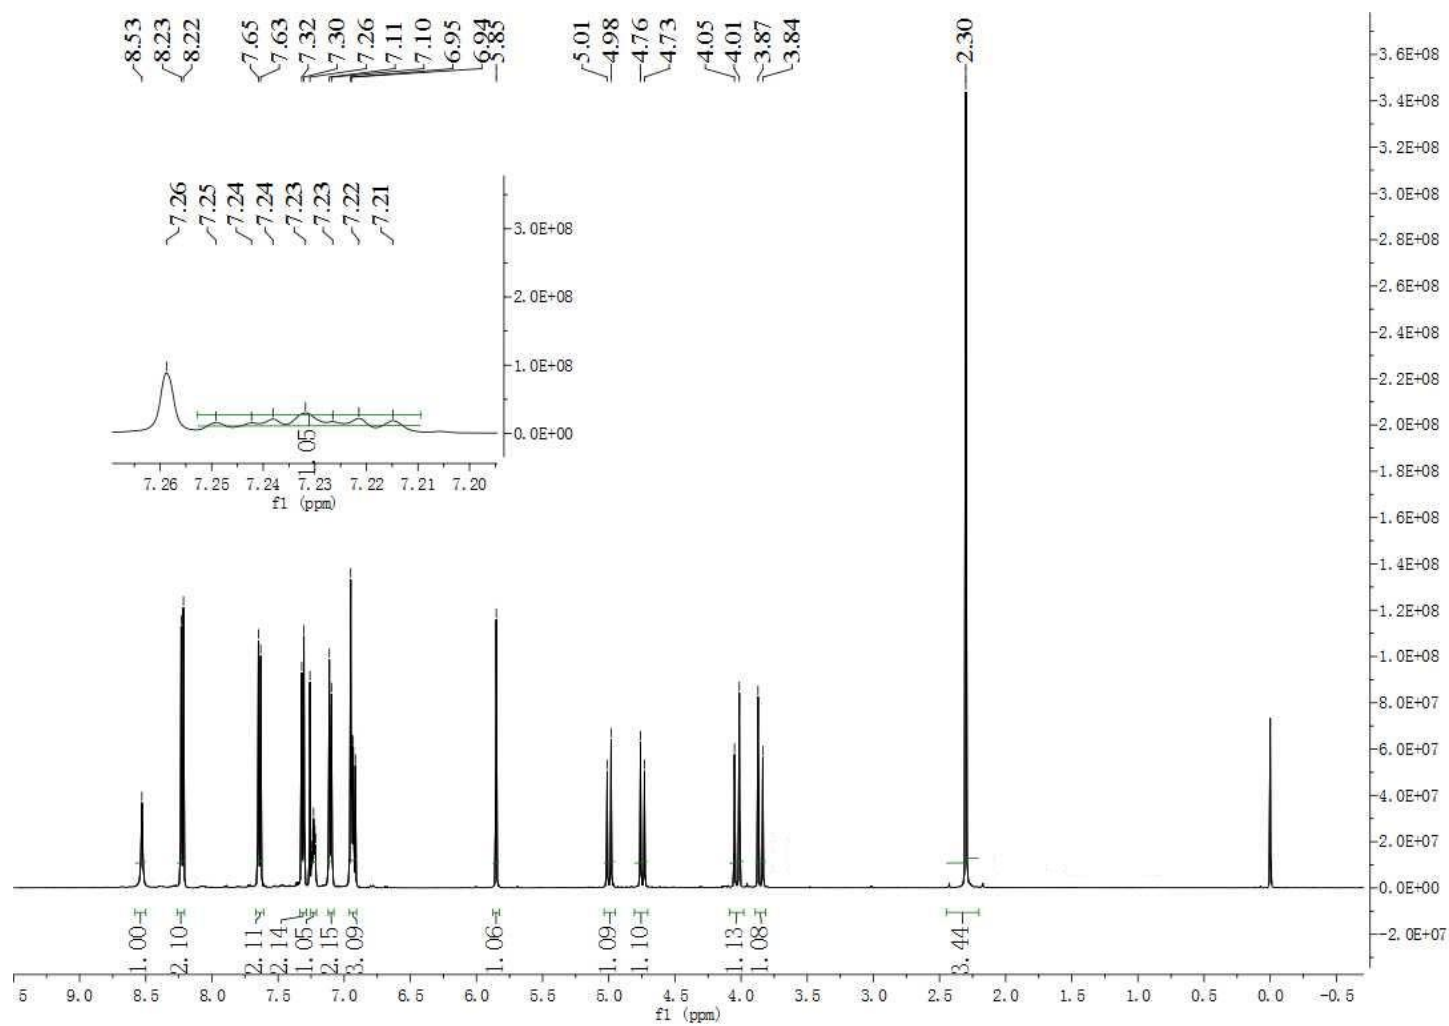

<sup>1</sup>H NMR of compound **5f**



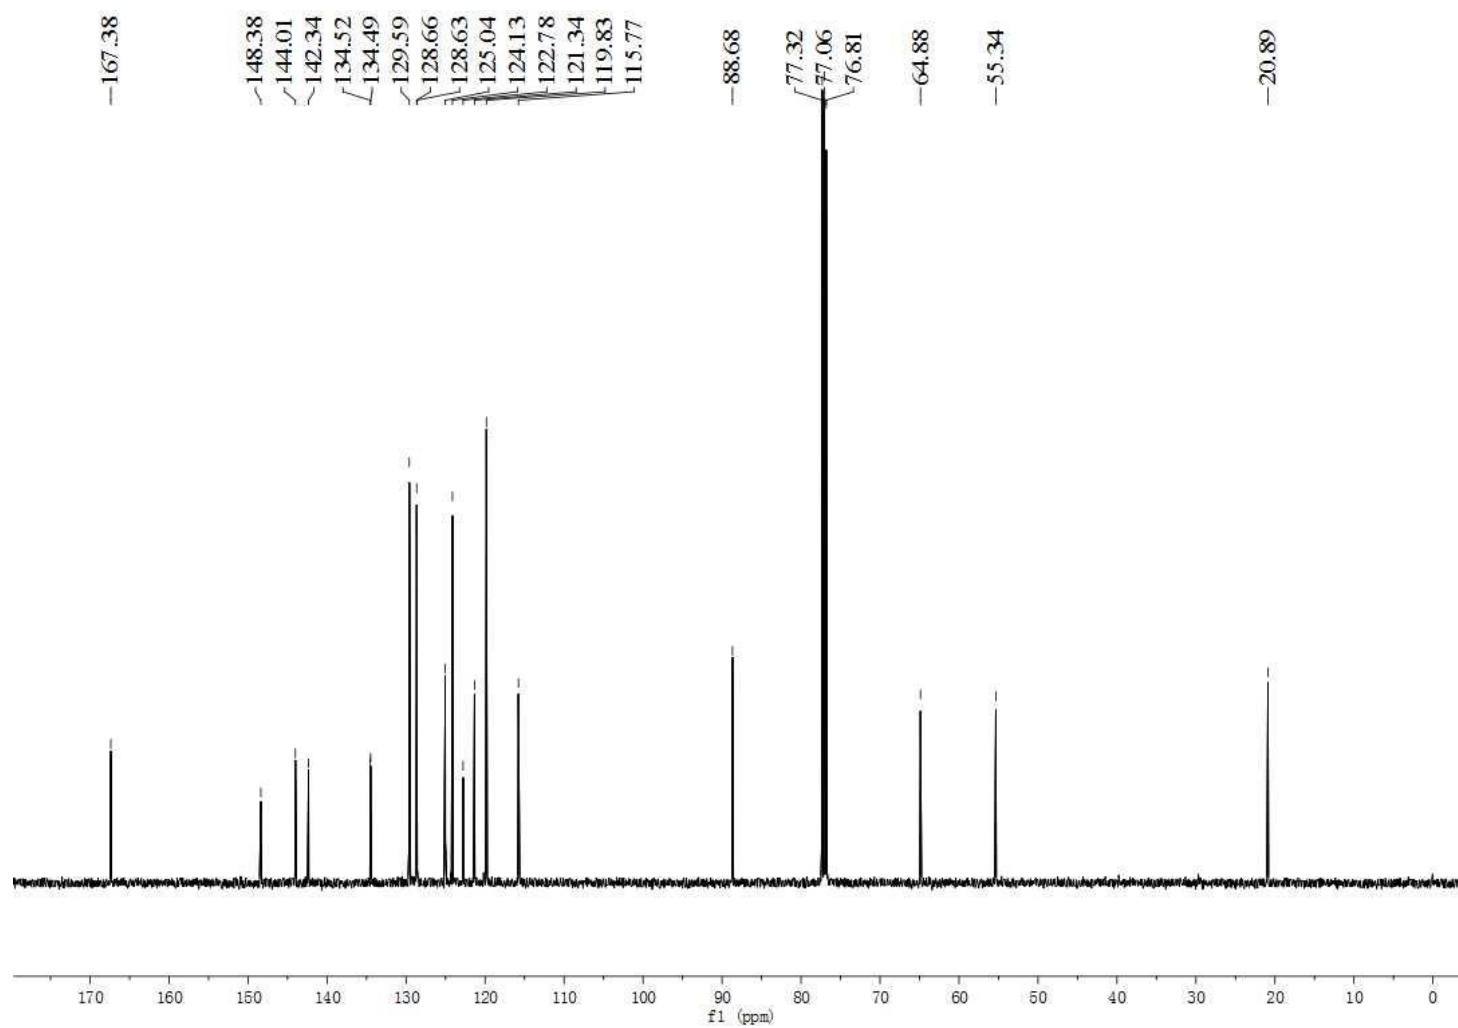

<sup>13</sup>C NMR of compound **5f**

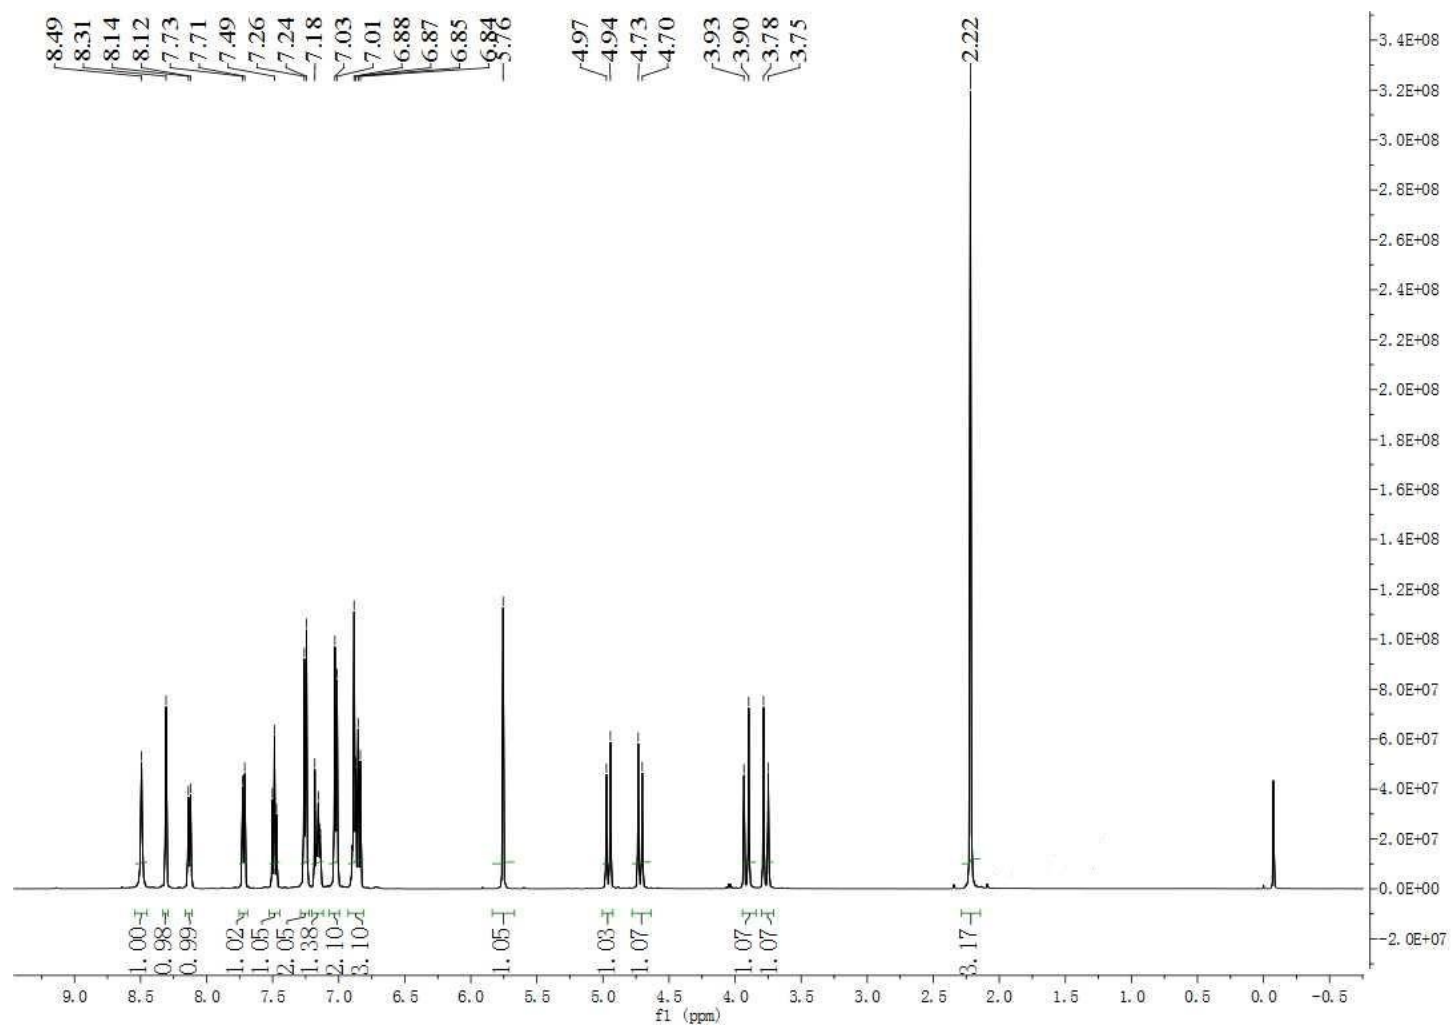

<sup>1</sup>H NMR of compound **5g**

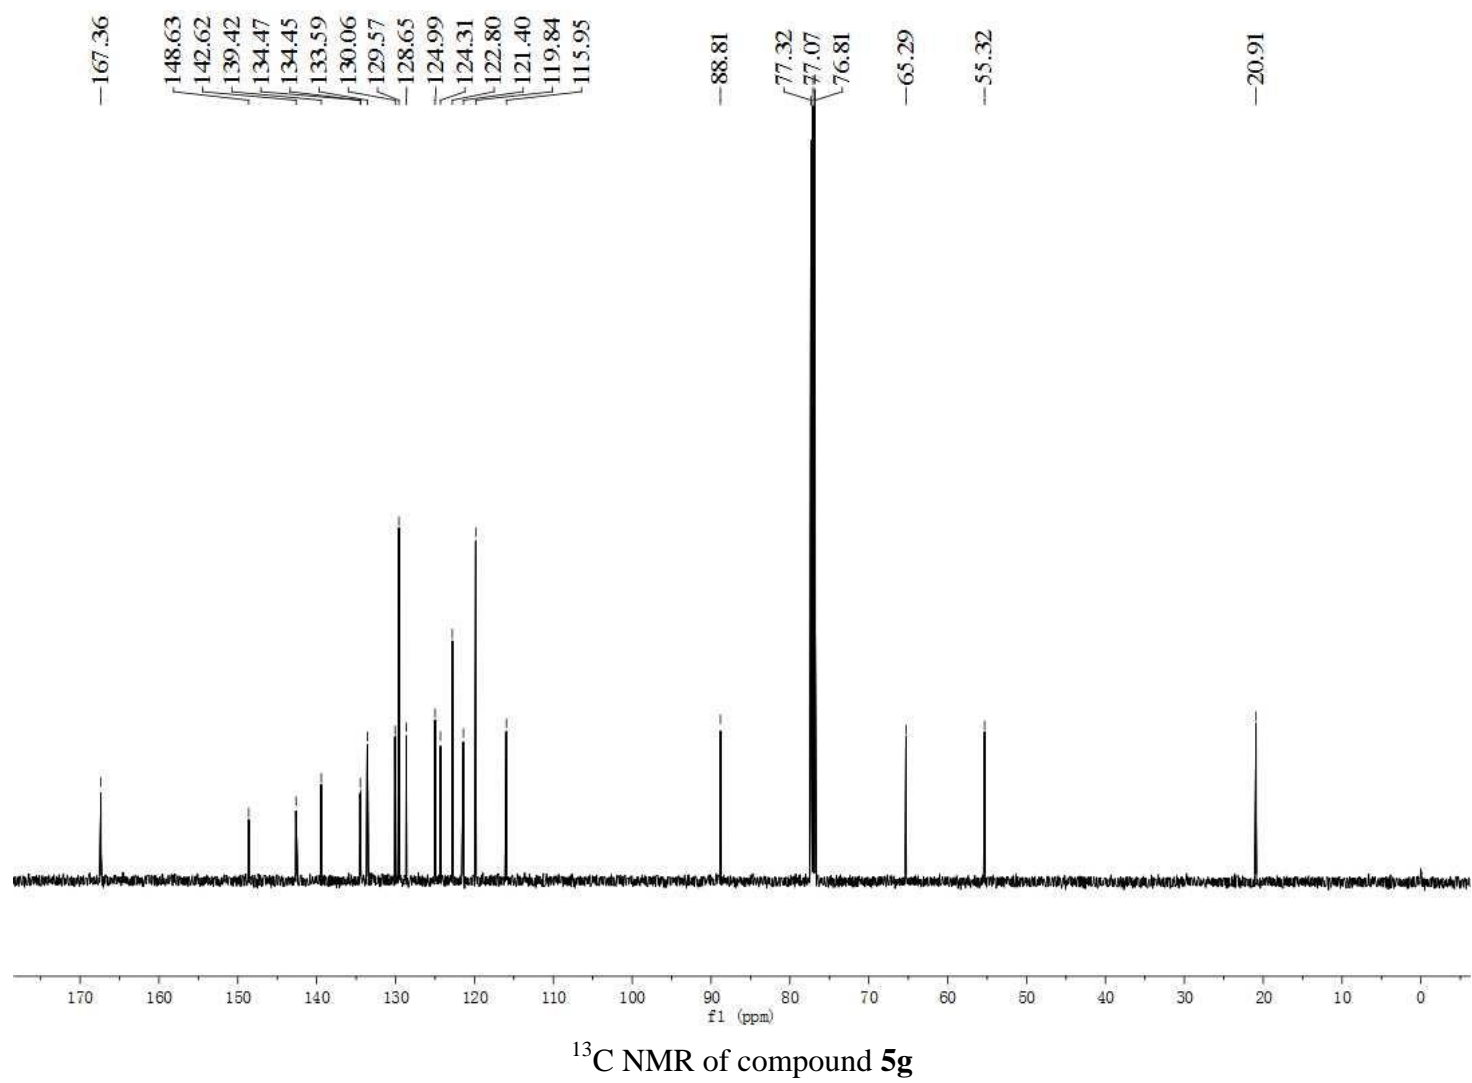

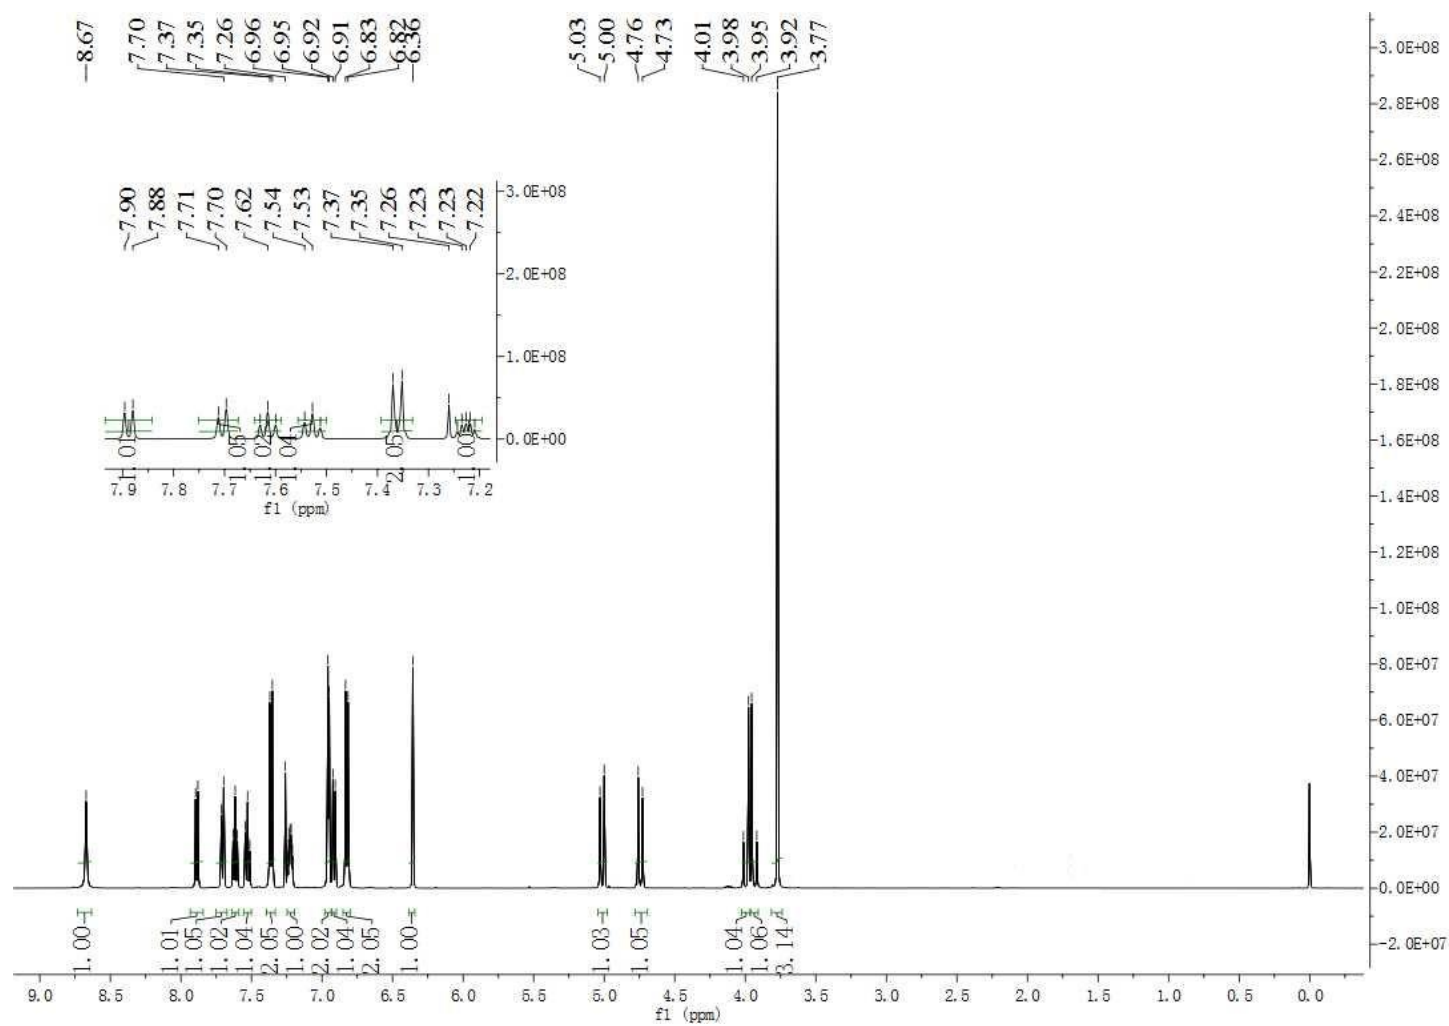

<sup>1</sup>H NMR of compound **5h**

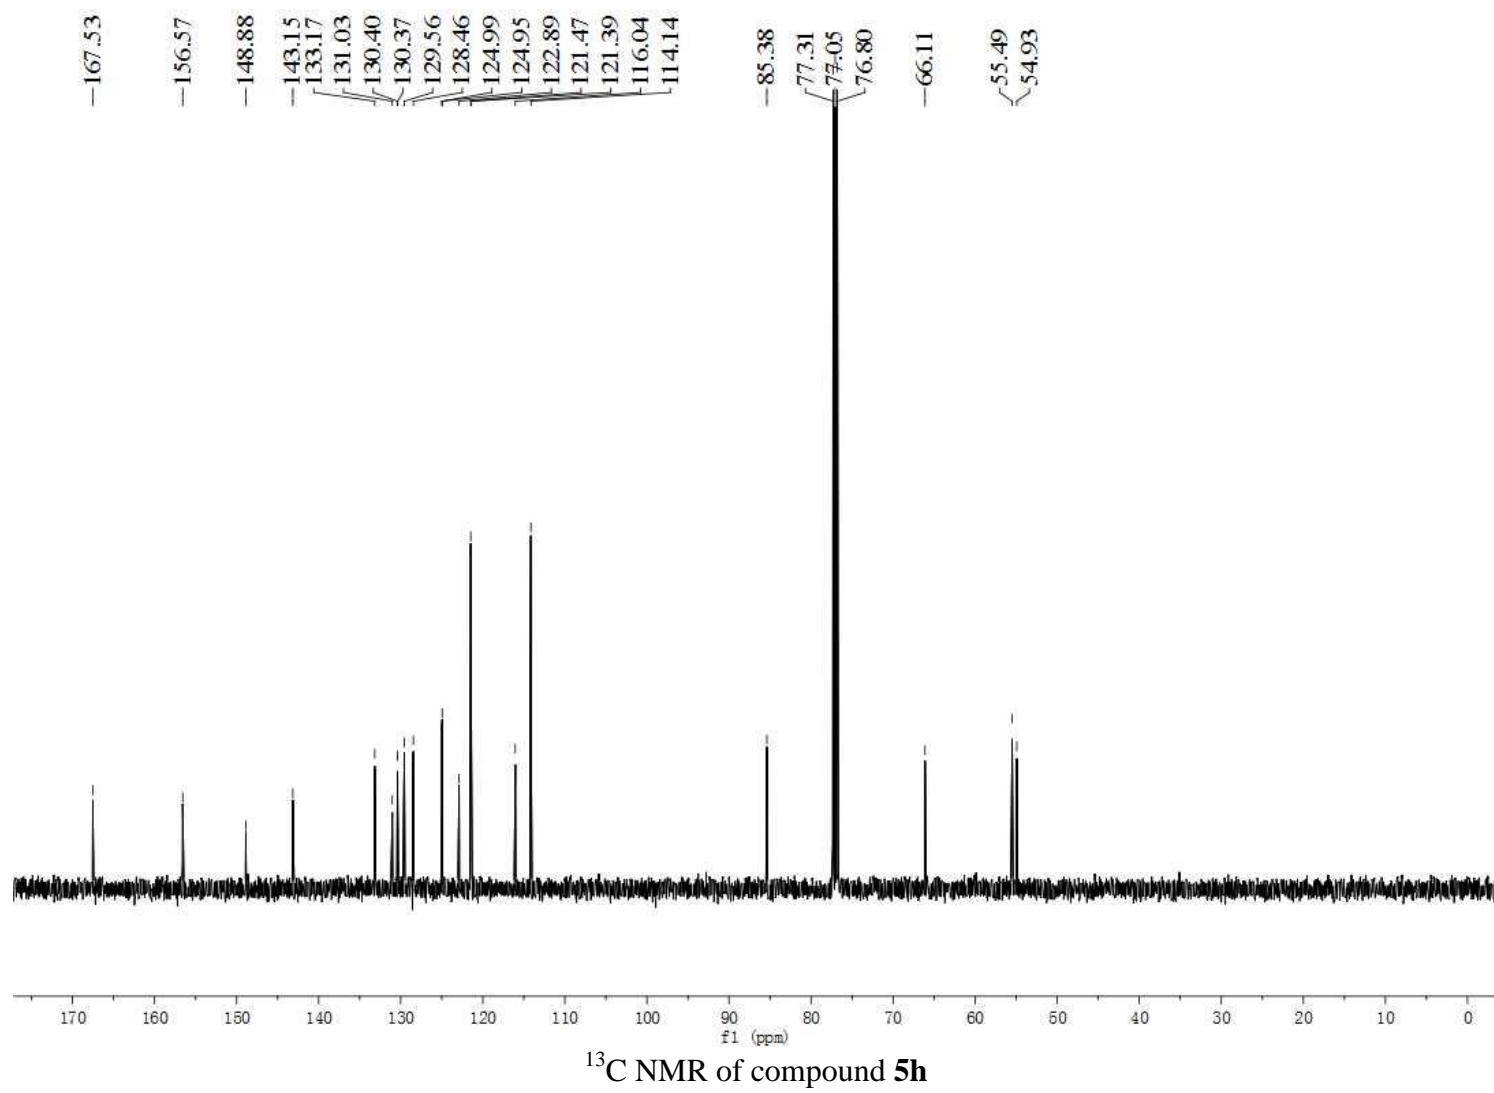

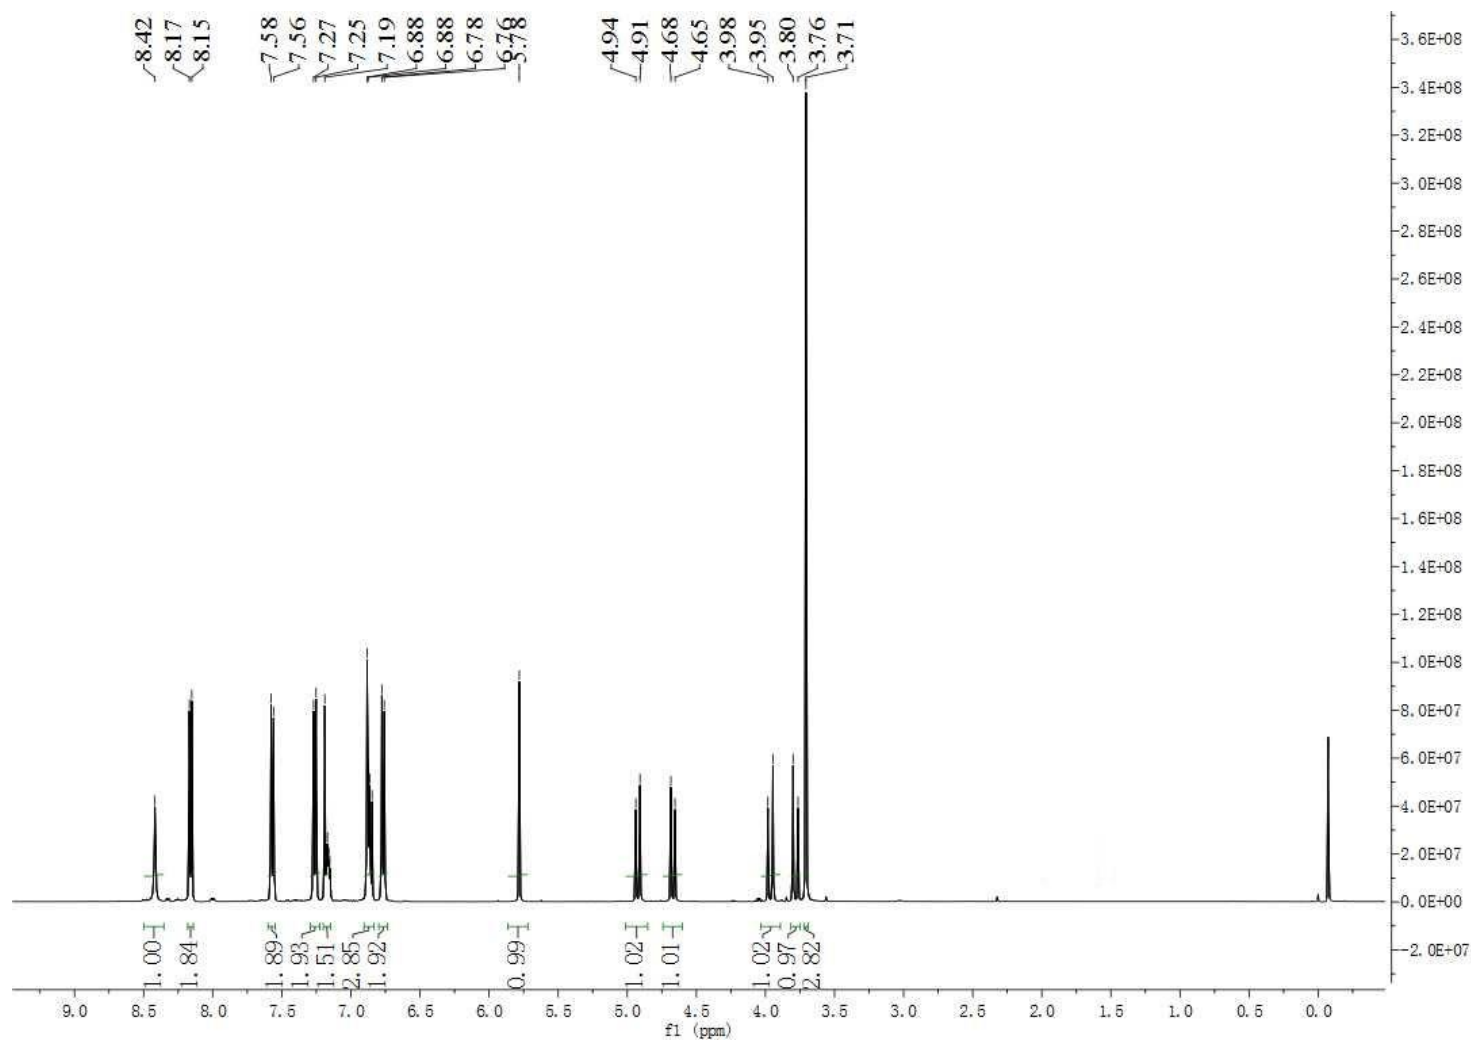

<sup>1</sup>H NMR of compound **5i**

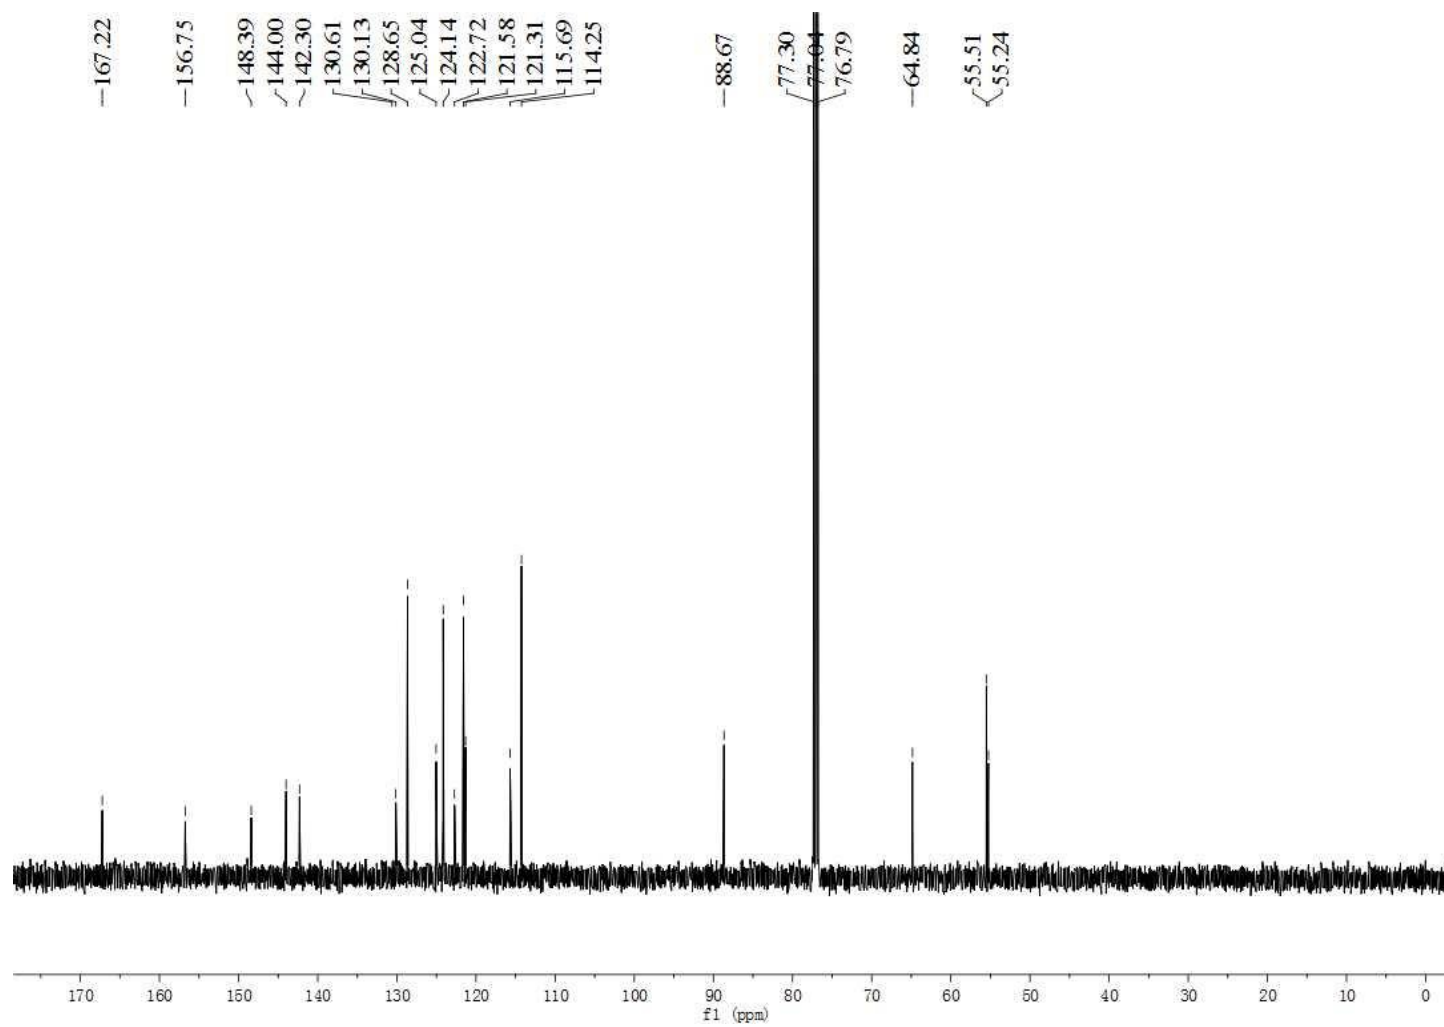

$^{13}\text{C}$  NMR of compound **5i**

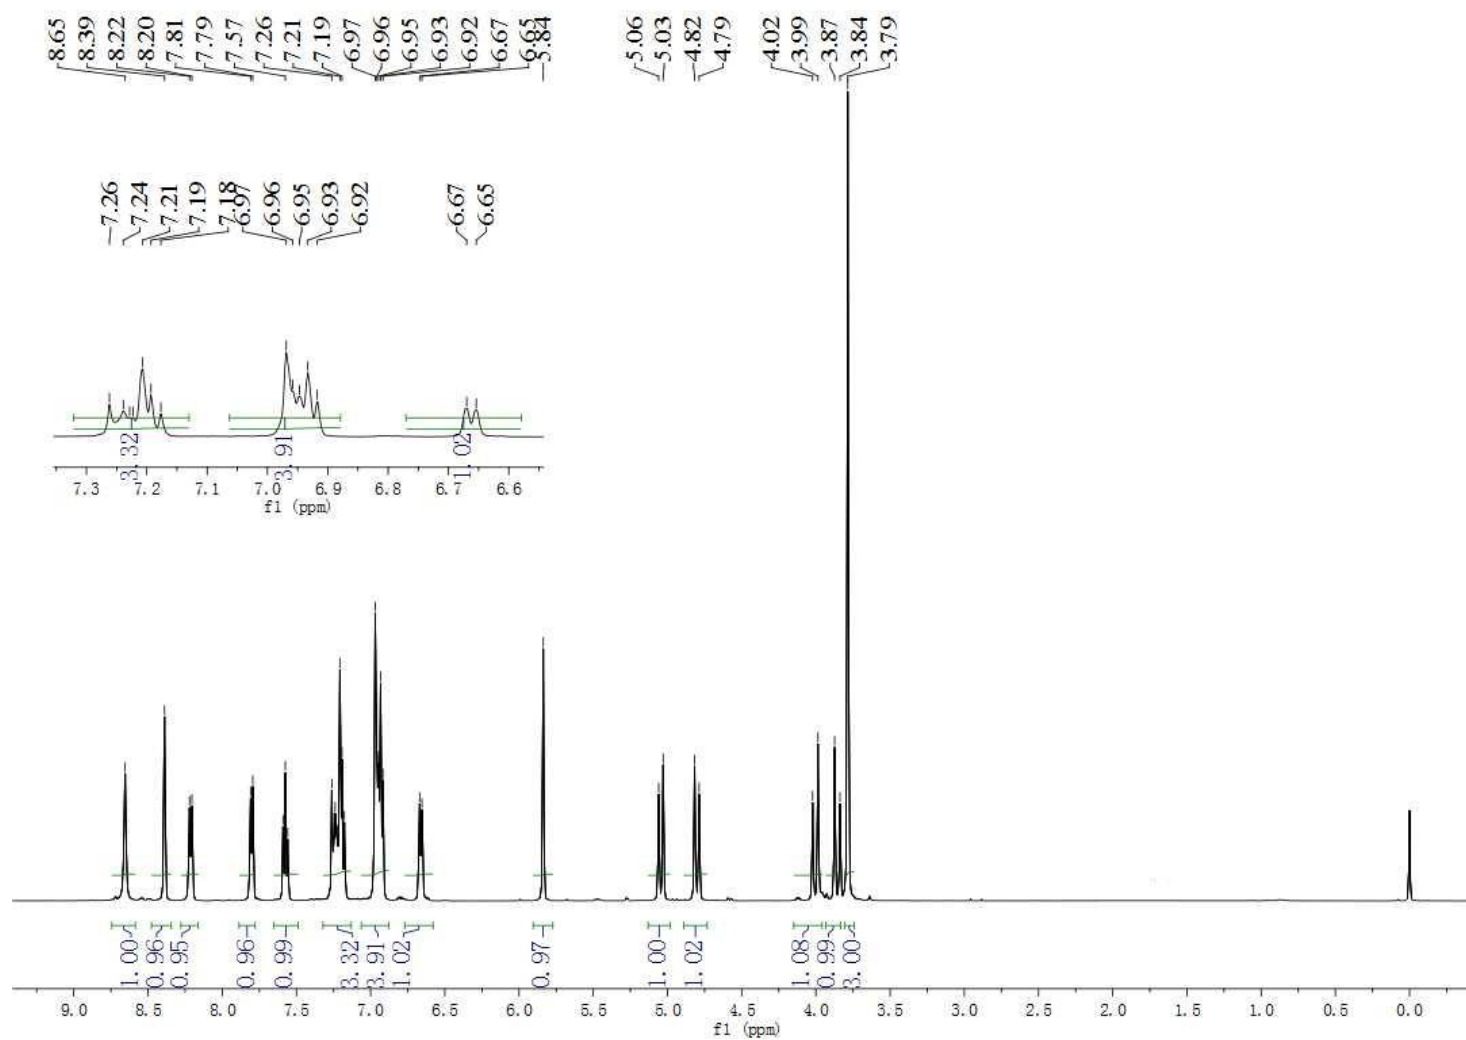

$^1\text{H}$  NMR of compound **5j**



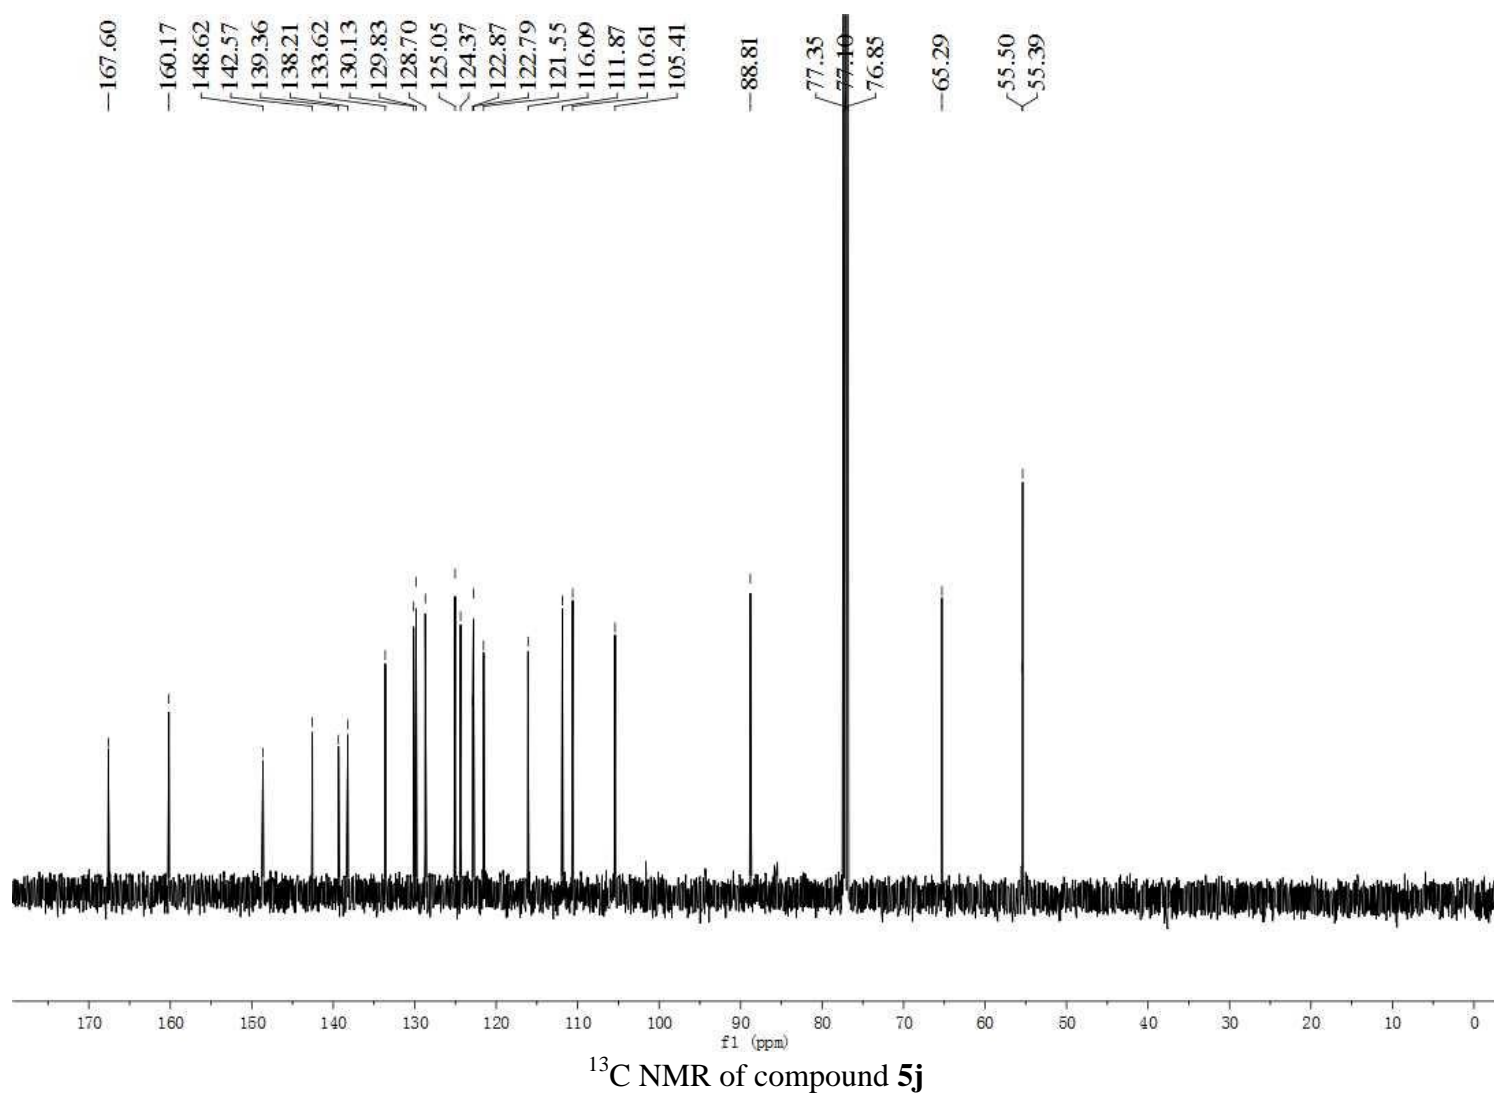

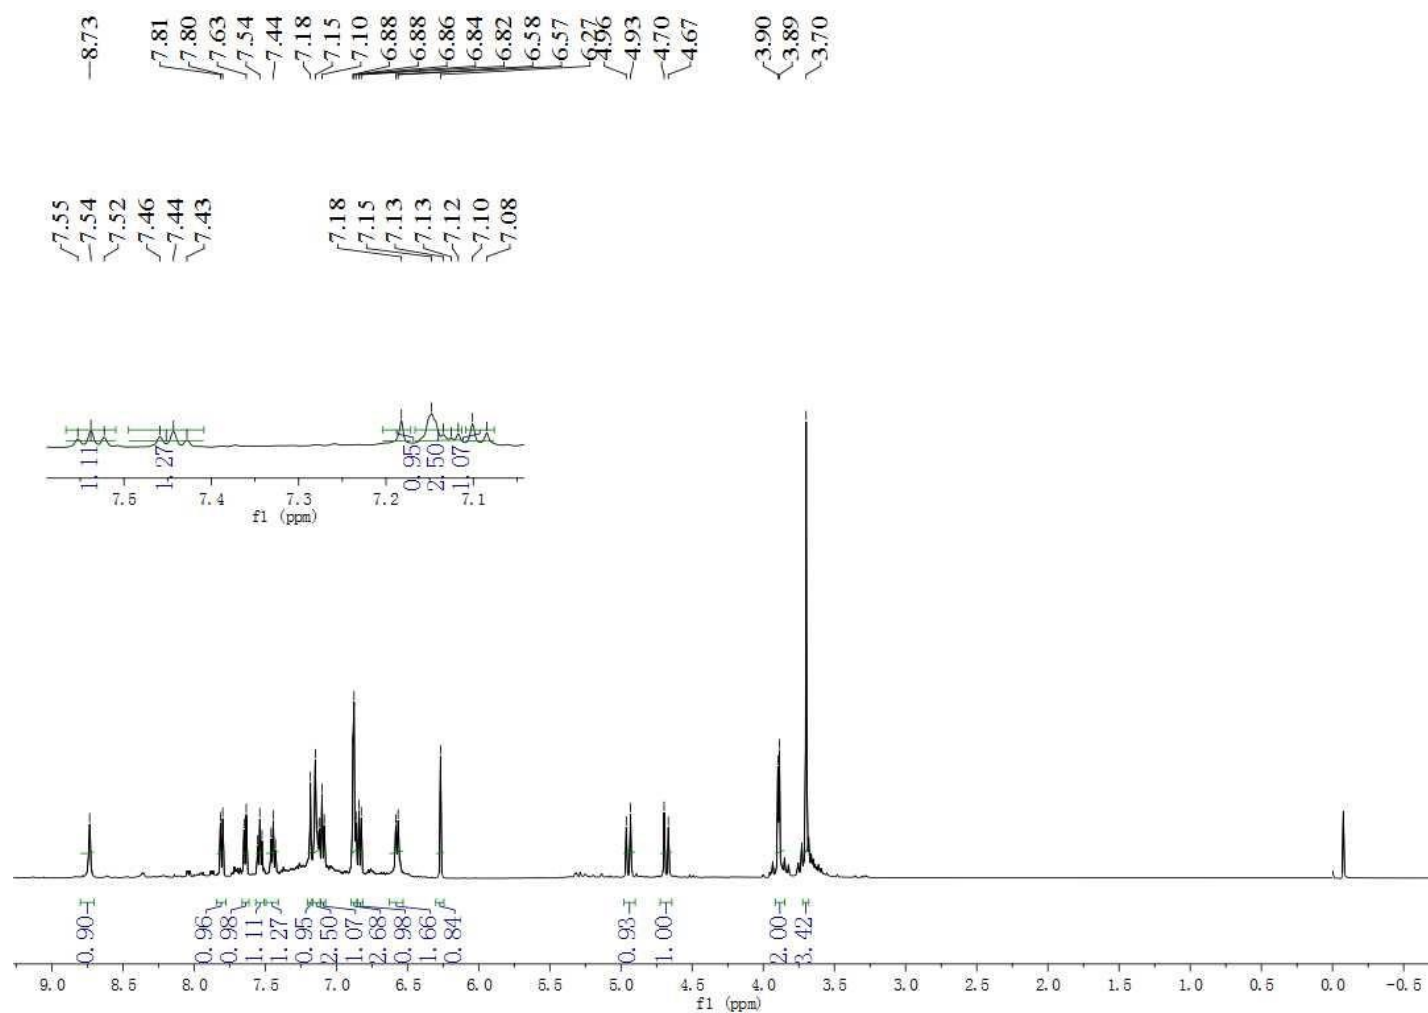

$^1\text{H}$  NMR of compound **5k**

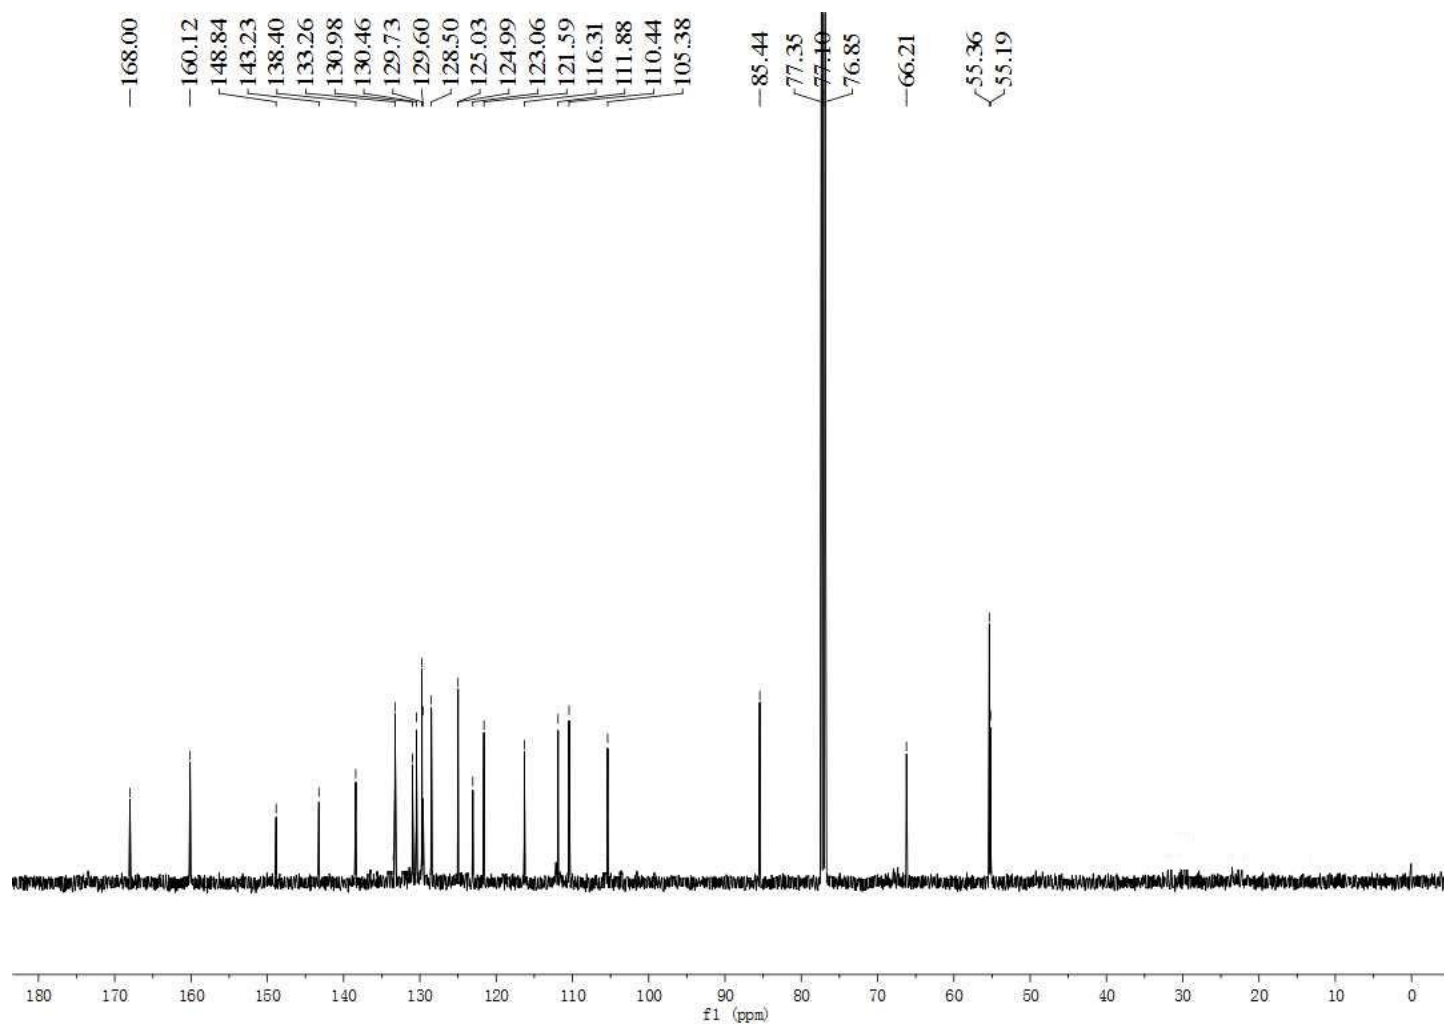

<sup>13</sup>C NMR of compound **5k**

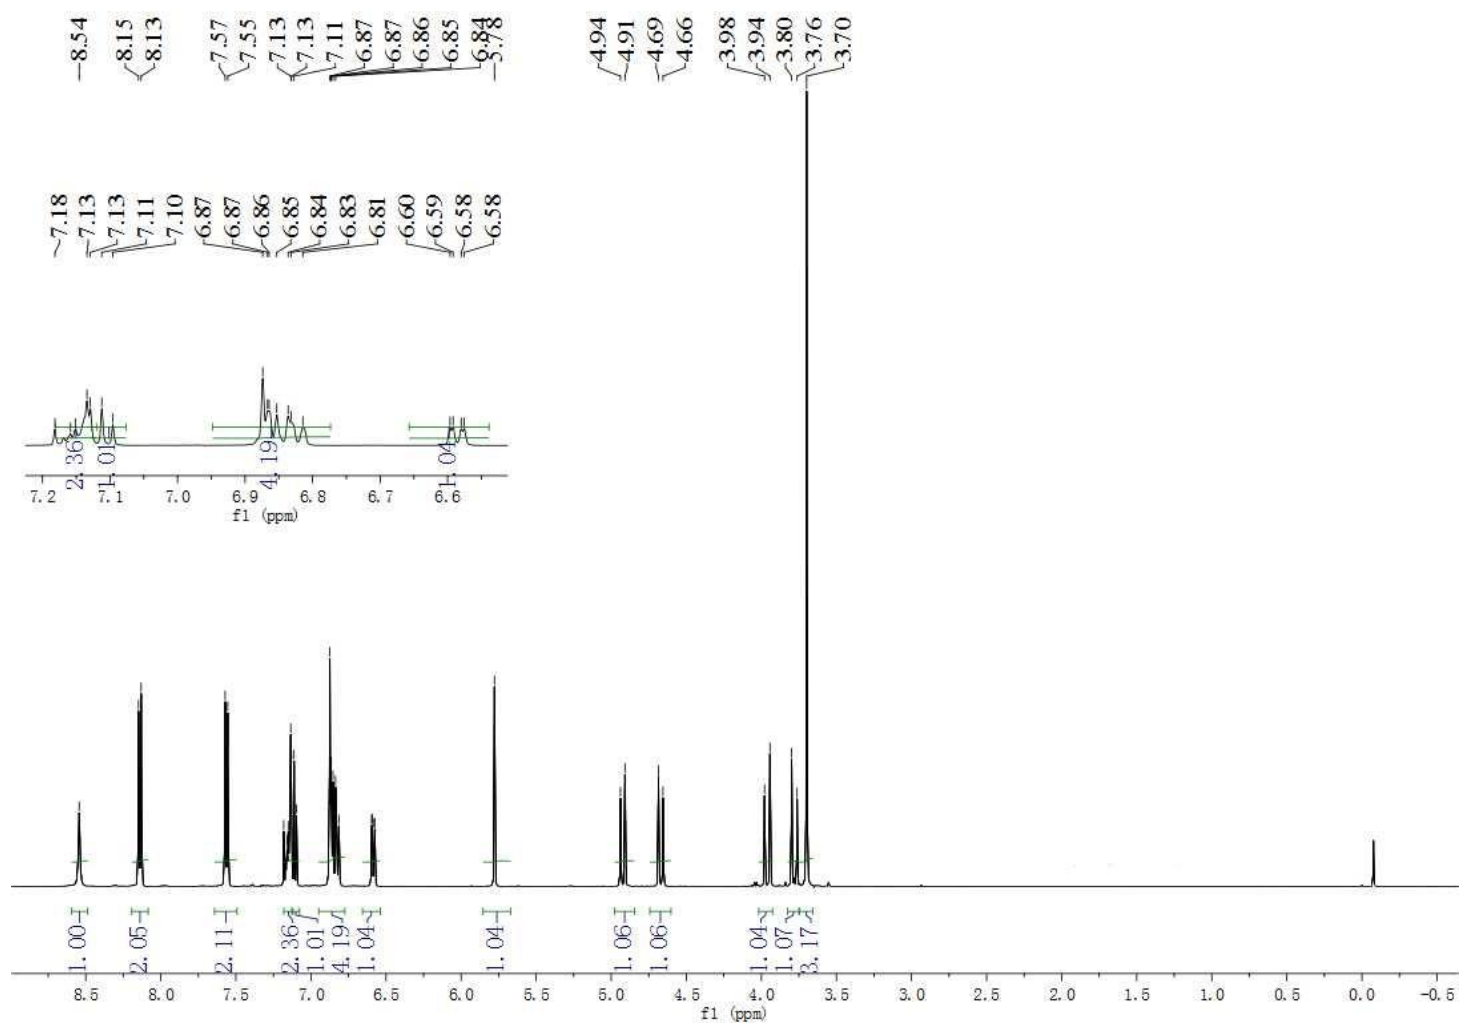

<sup>1</sup>H NMR of compound **51**

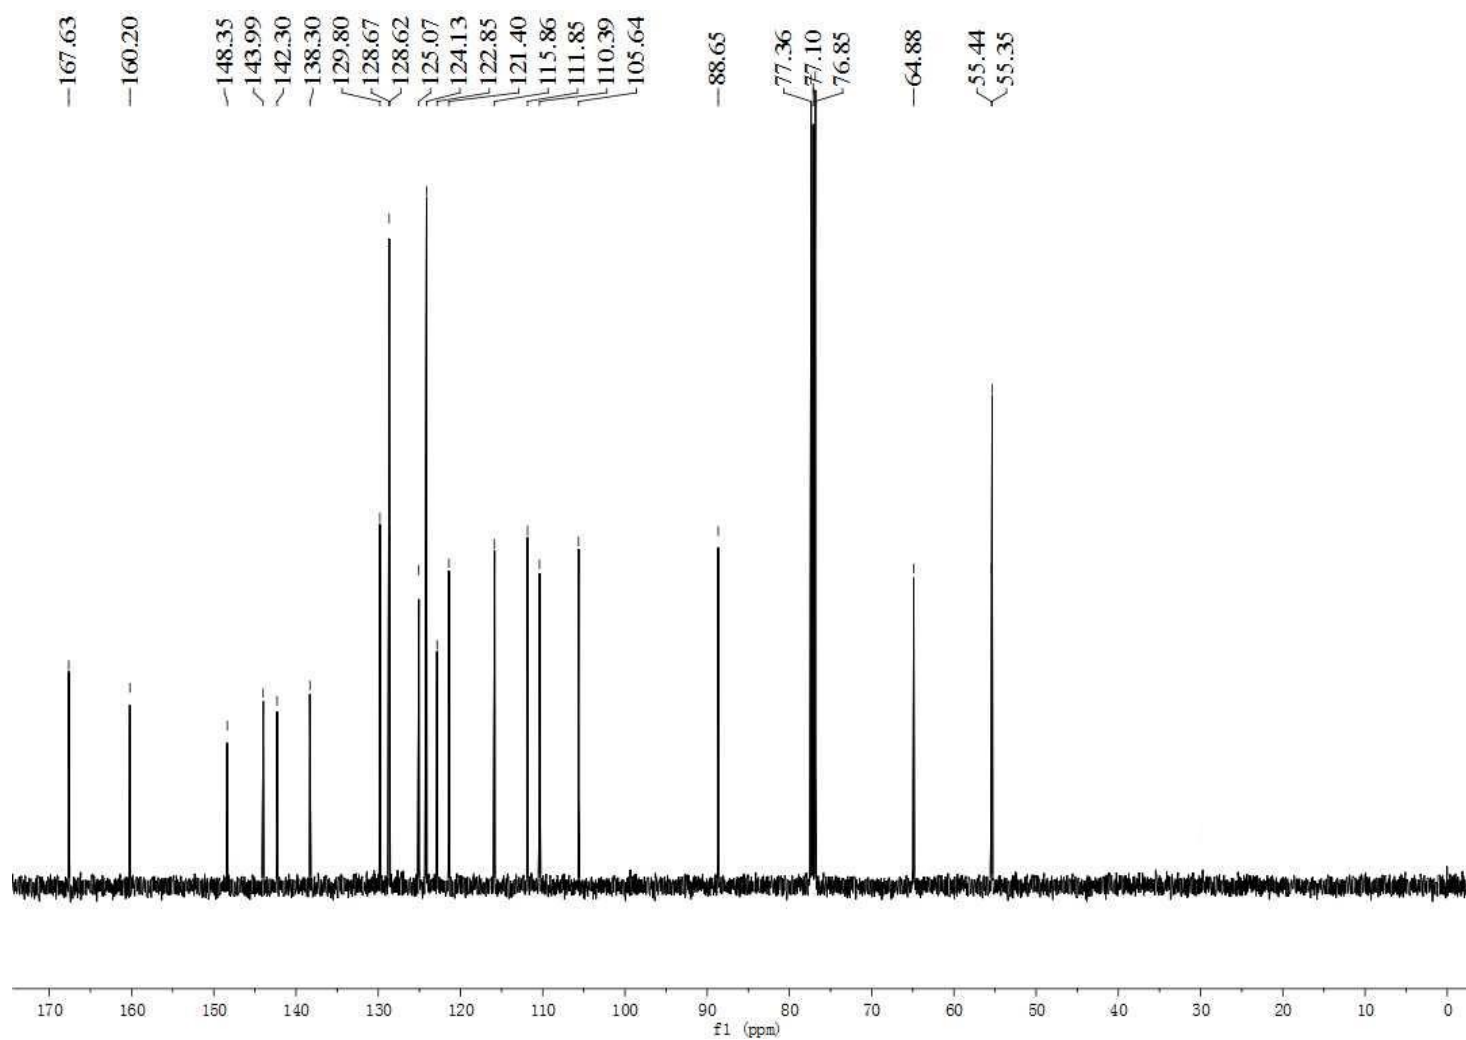

<sup>13</sup>C NMR of compound **5I**

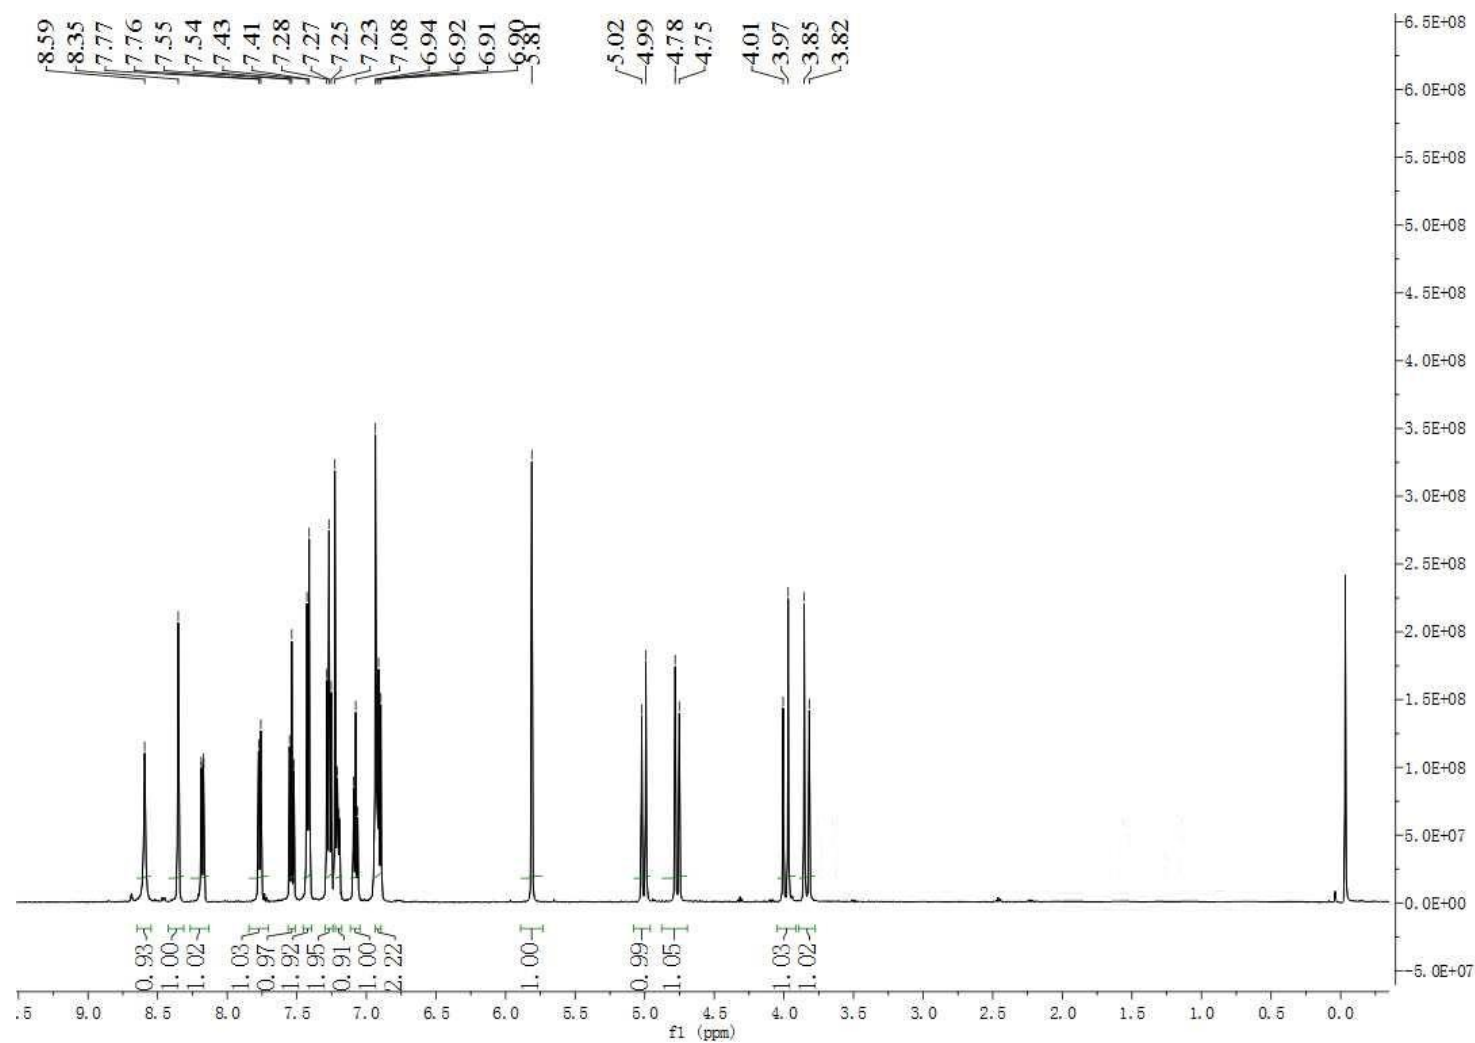

<sup>1</sup>H NMR of compound **5m**

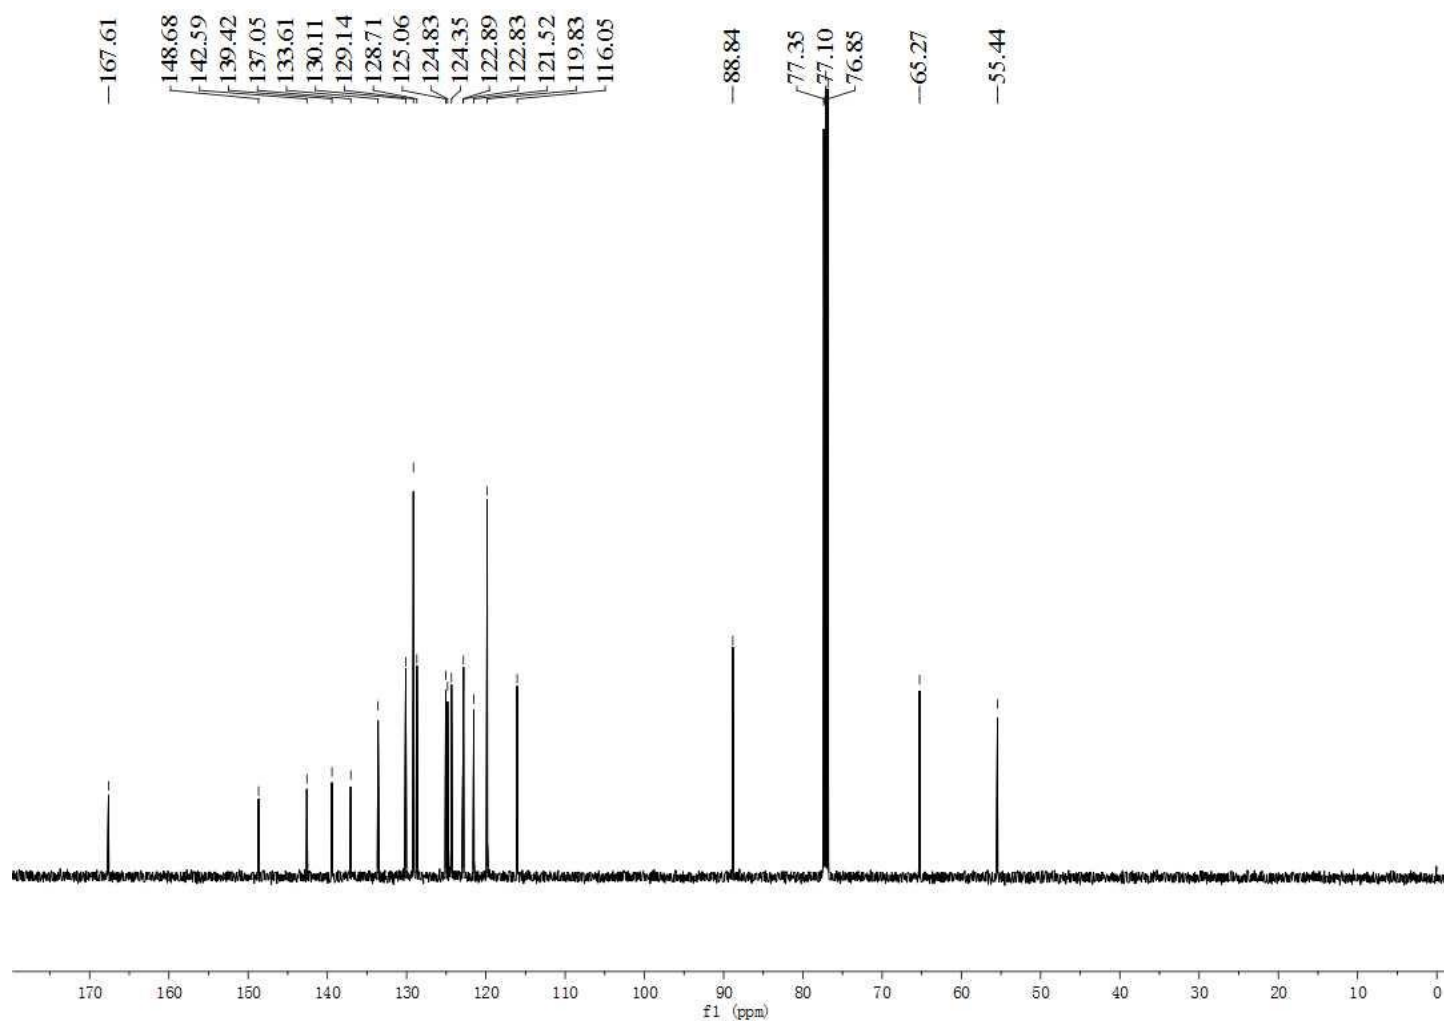

$^{13}\text{C}$  NMR of compound **5m**

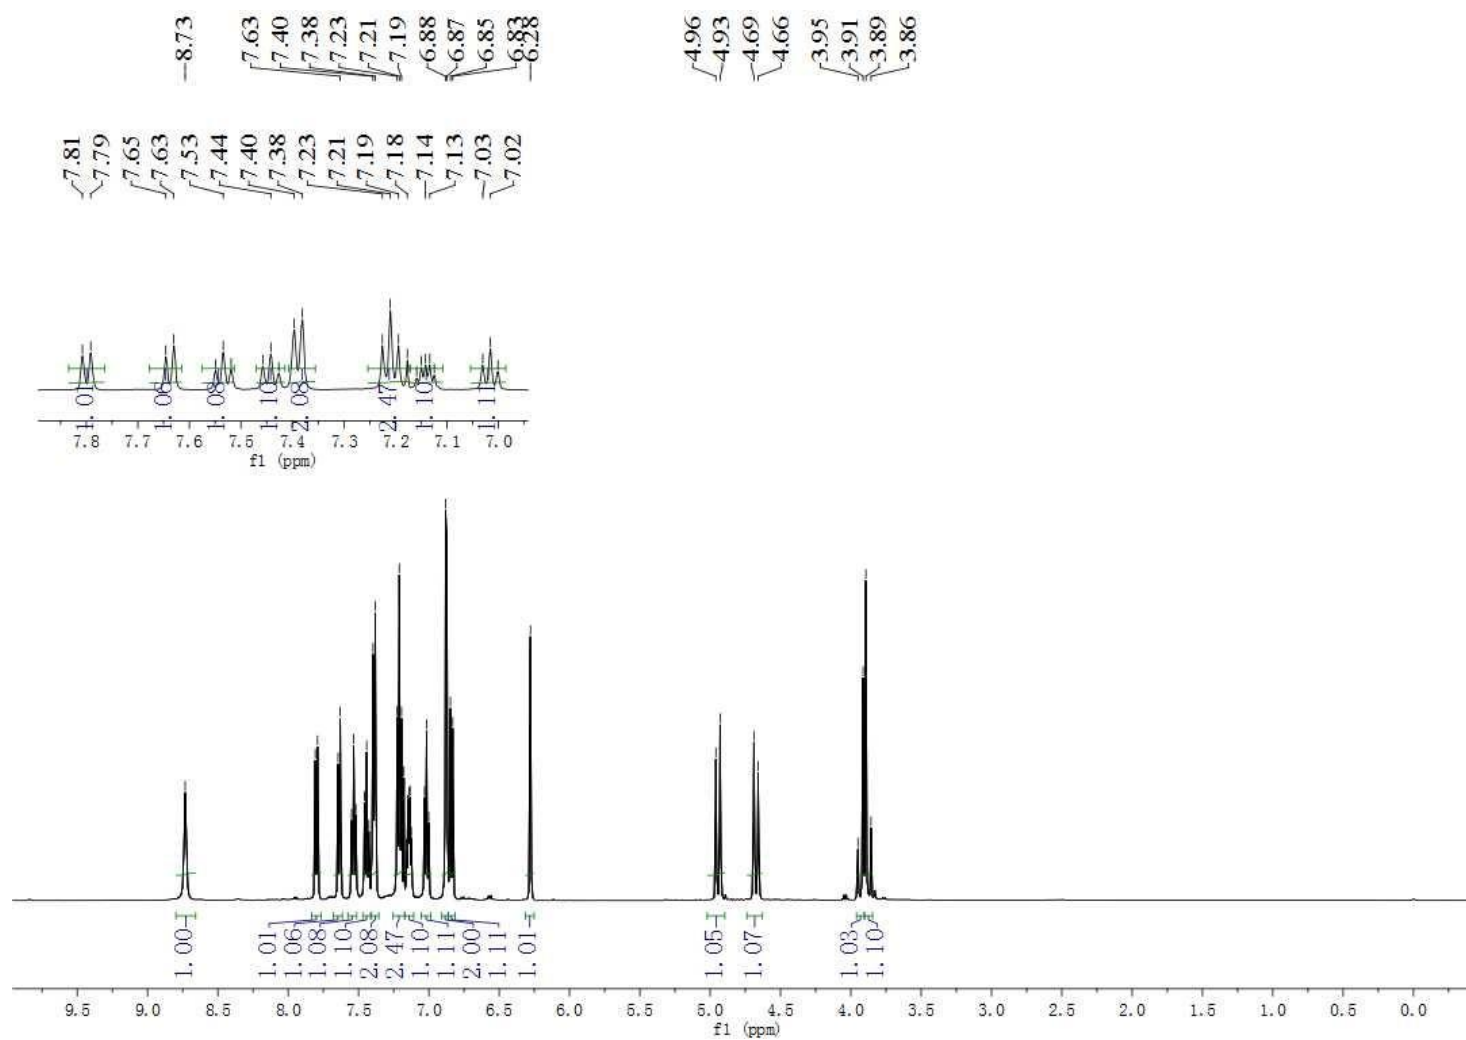

<sup>1</sup>H NMR of compound **5n**



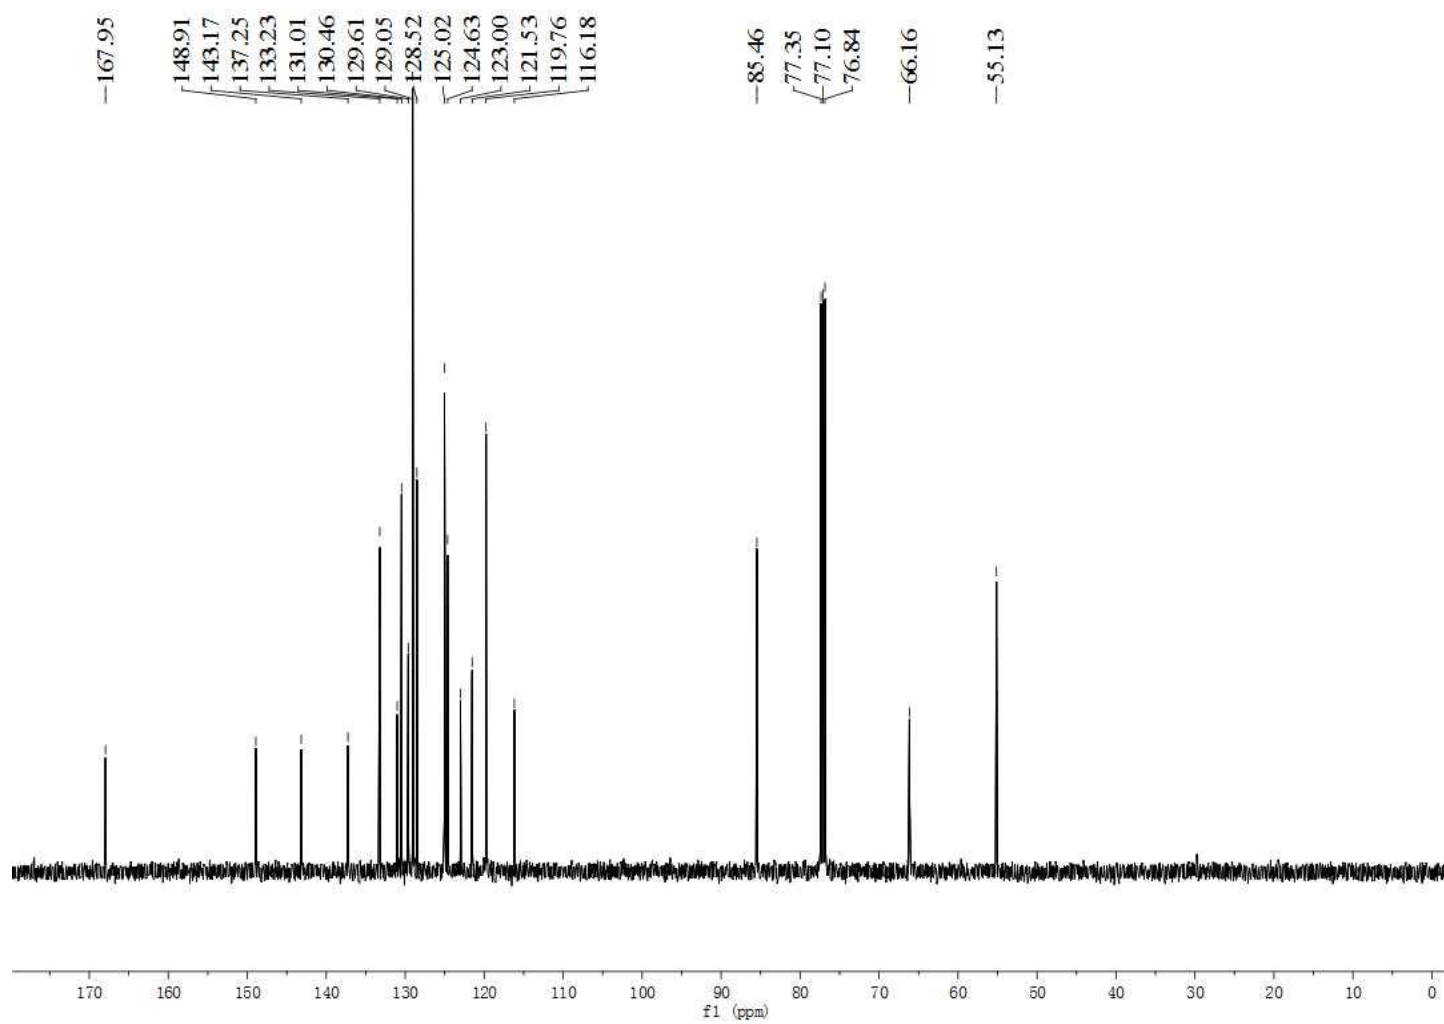

$^{13}\text{C}$  NMR of compound **5n**

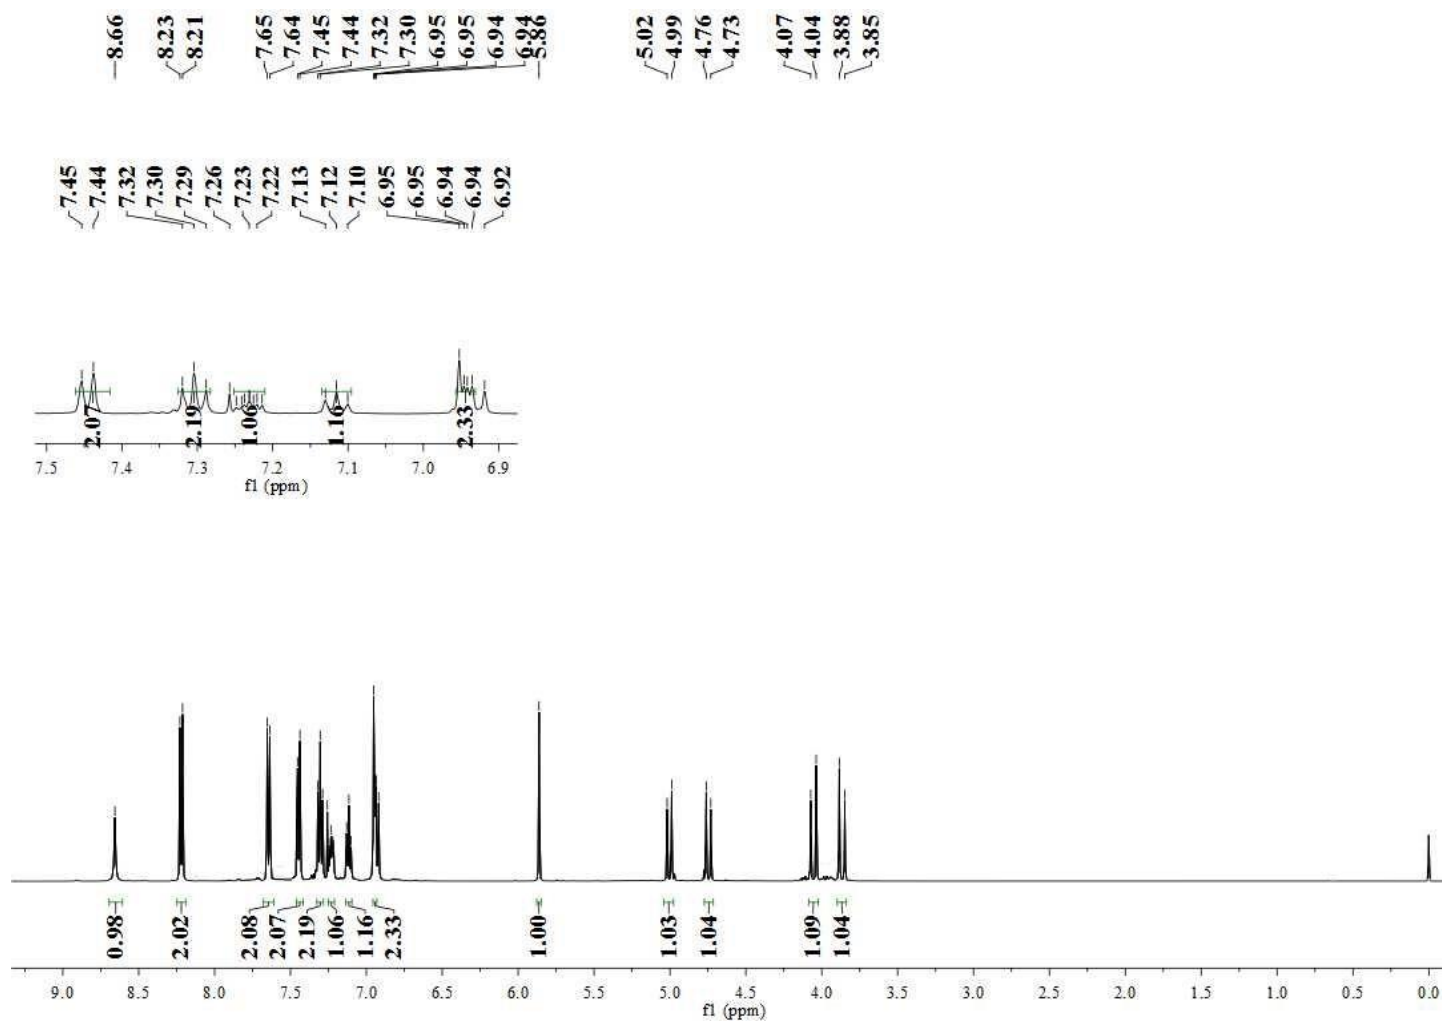

$^1\text{H}$  NMR of compound **5o**

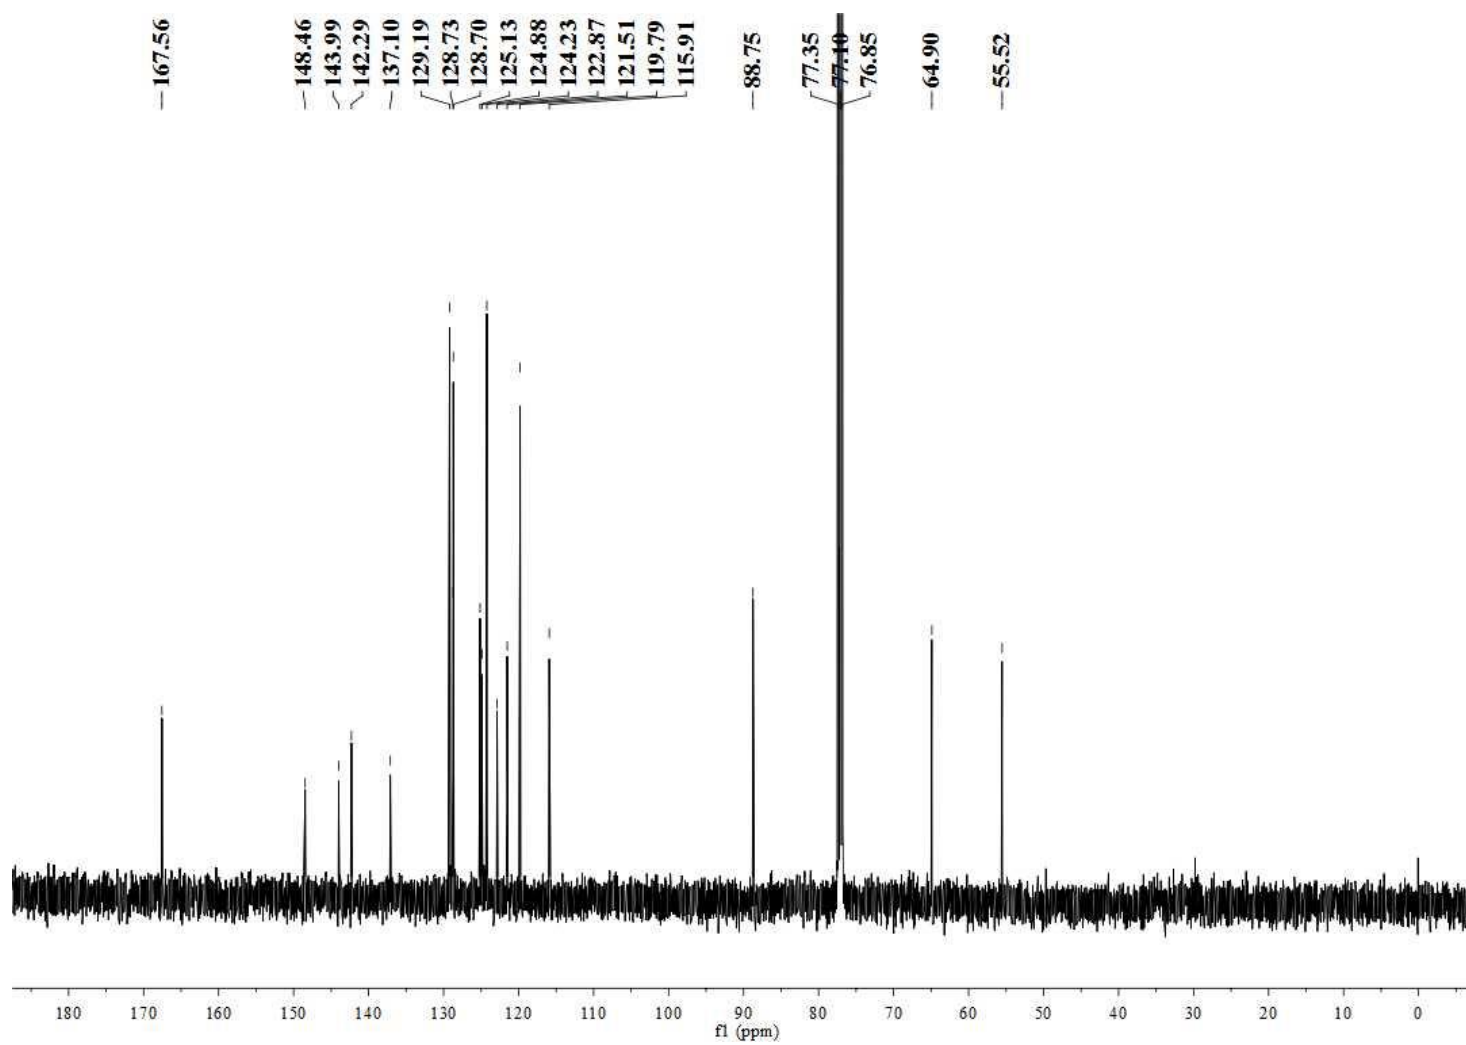

$^{13}\text{C}$  NMR of compound **5o**

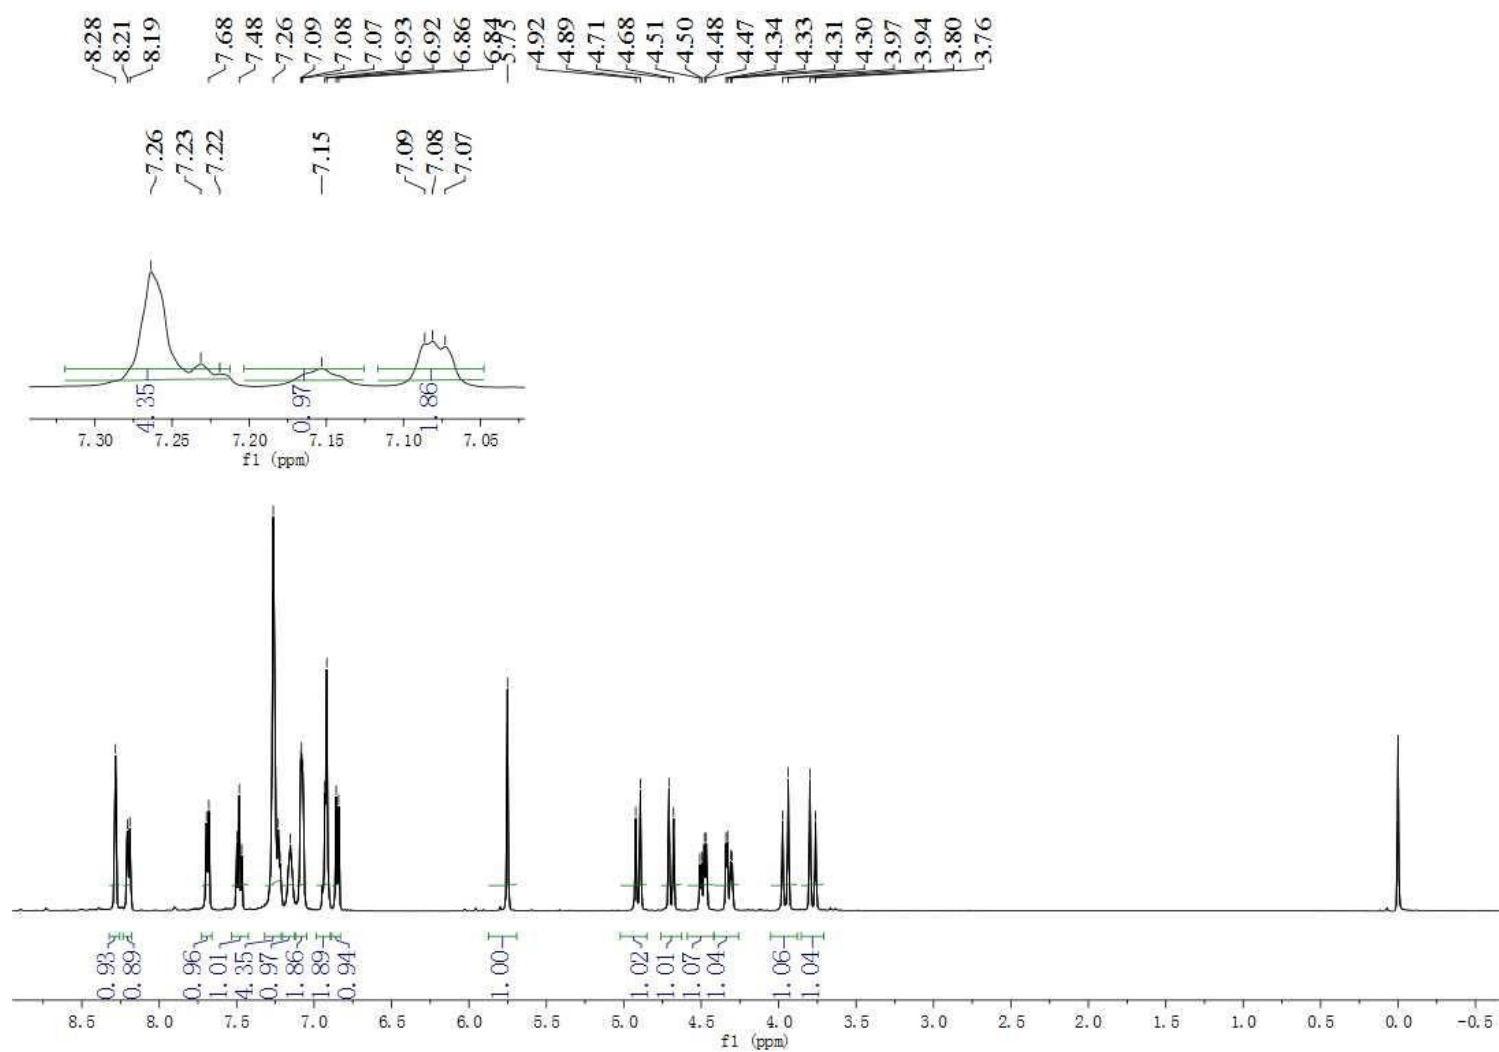

<sup>1</sup>H NMR of compound **5p**

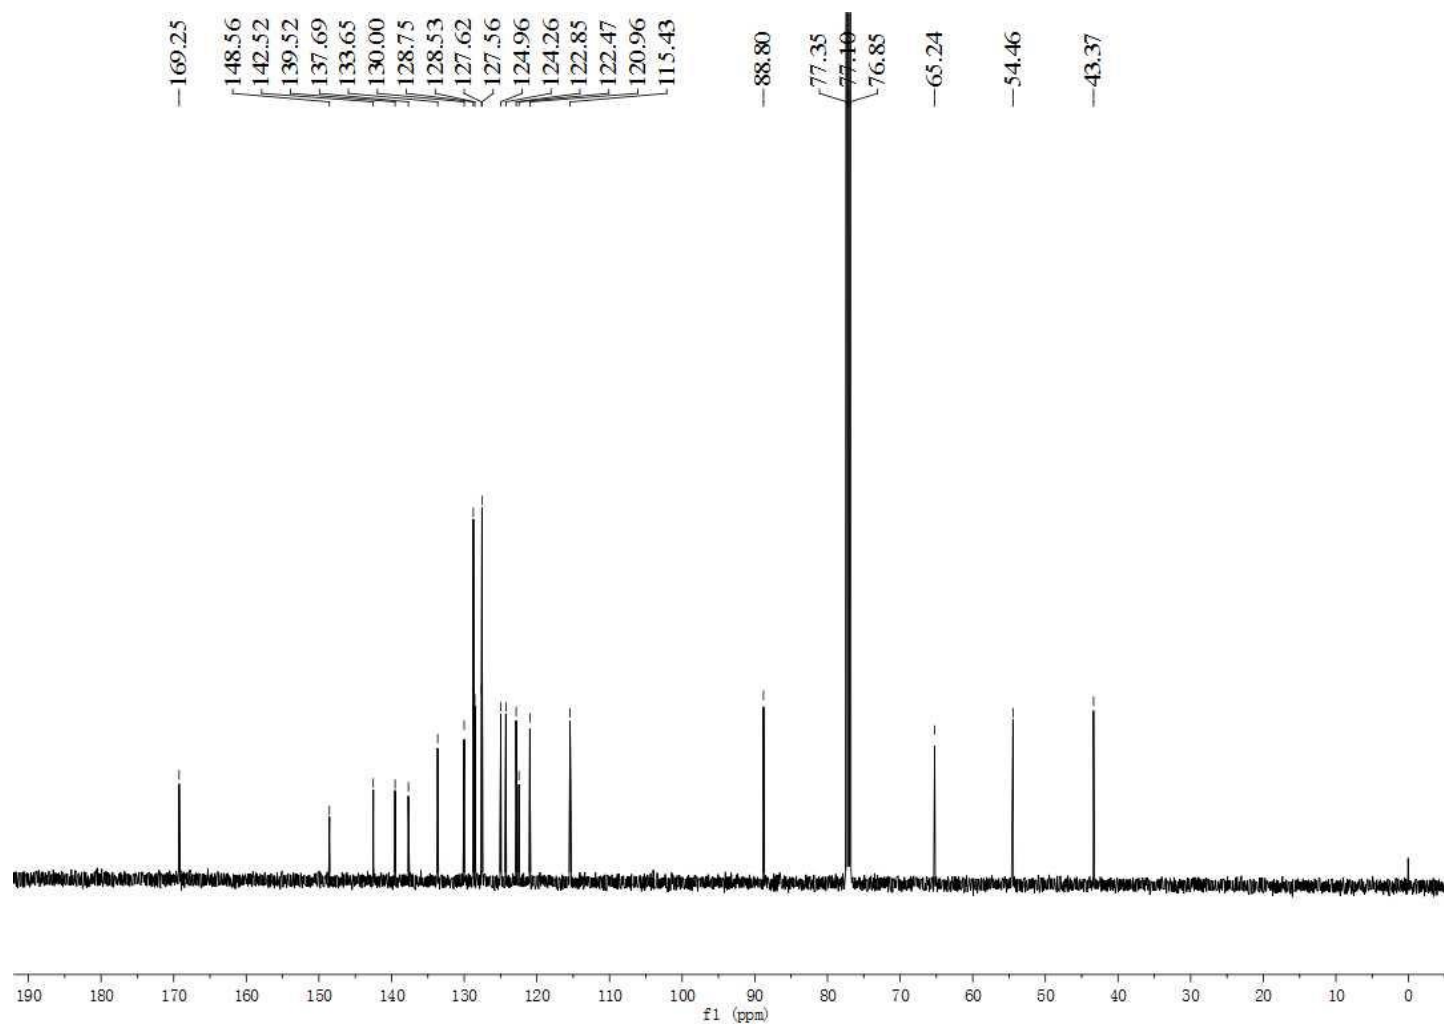

$^{13}\text{C}$  NMR of compound **5p**

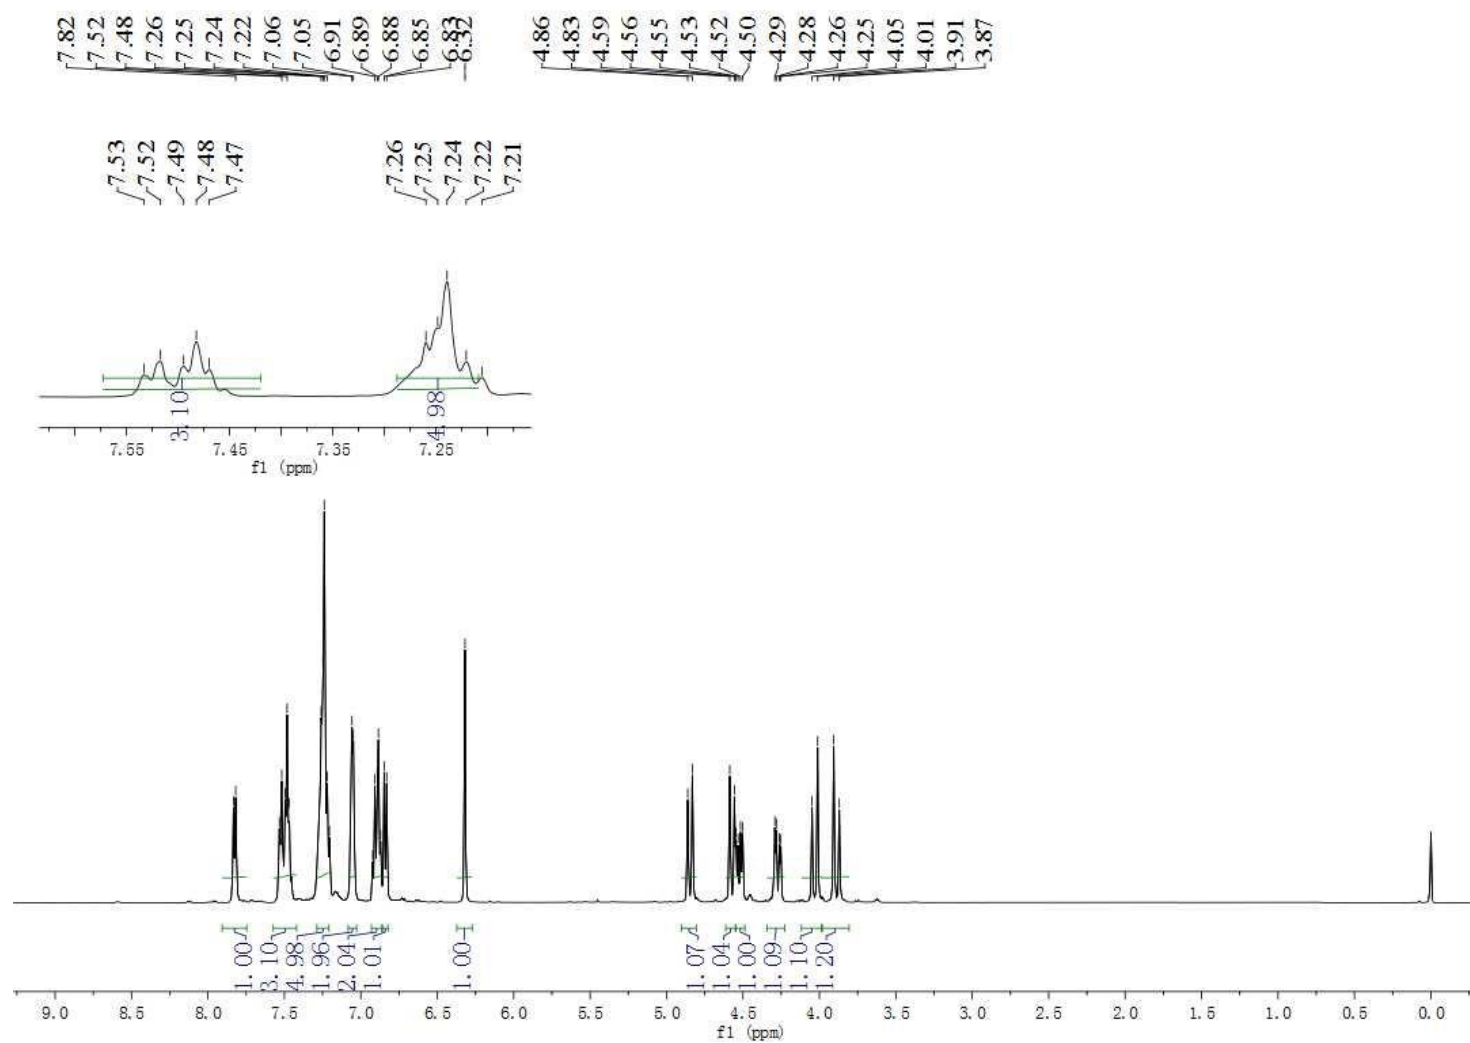

$^1\text{H}$  NMR of compound **5q**

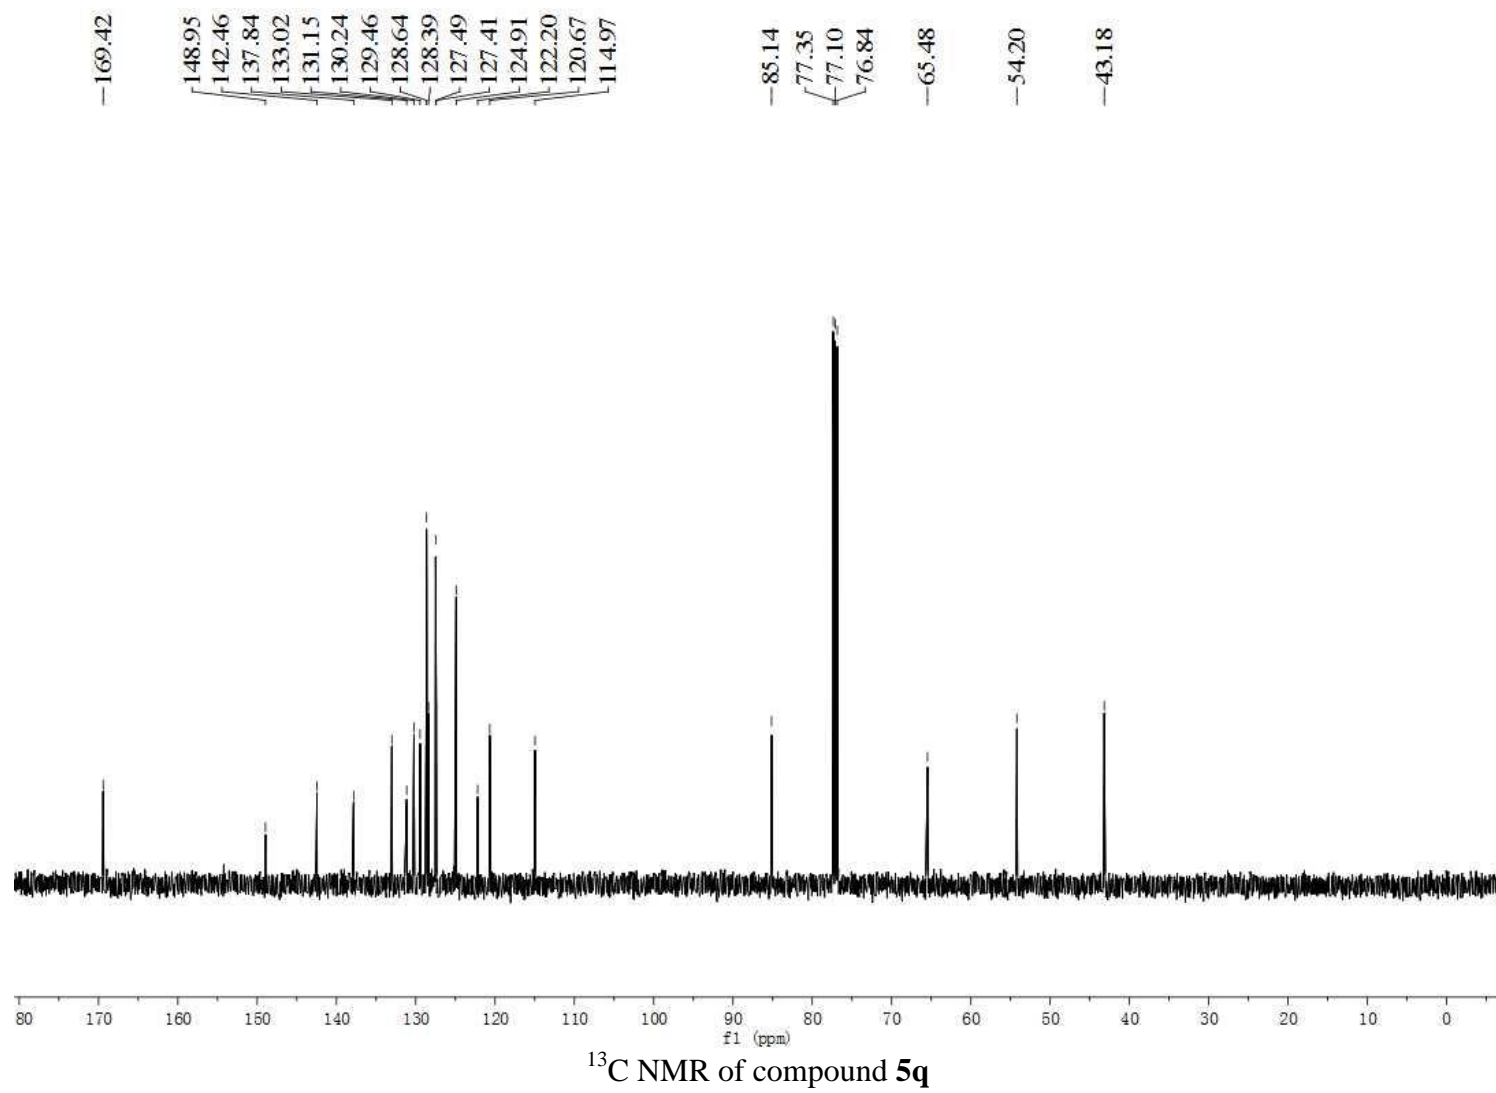

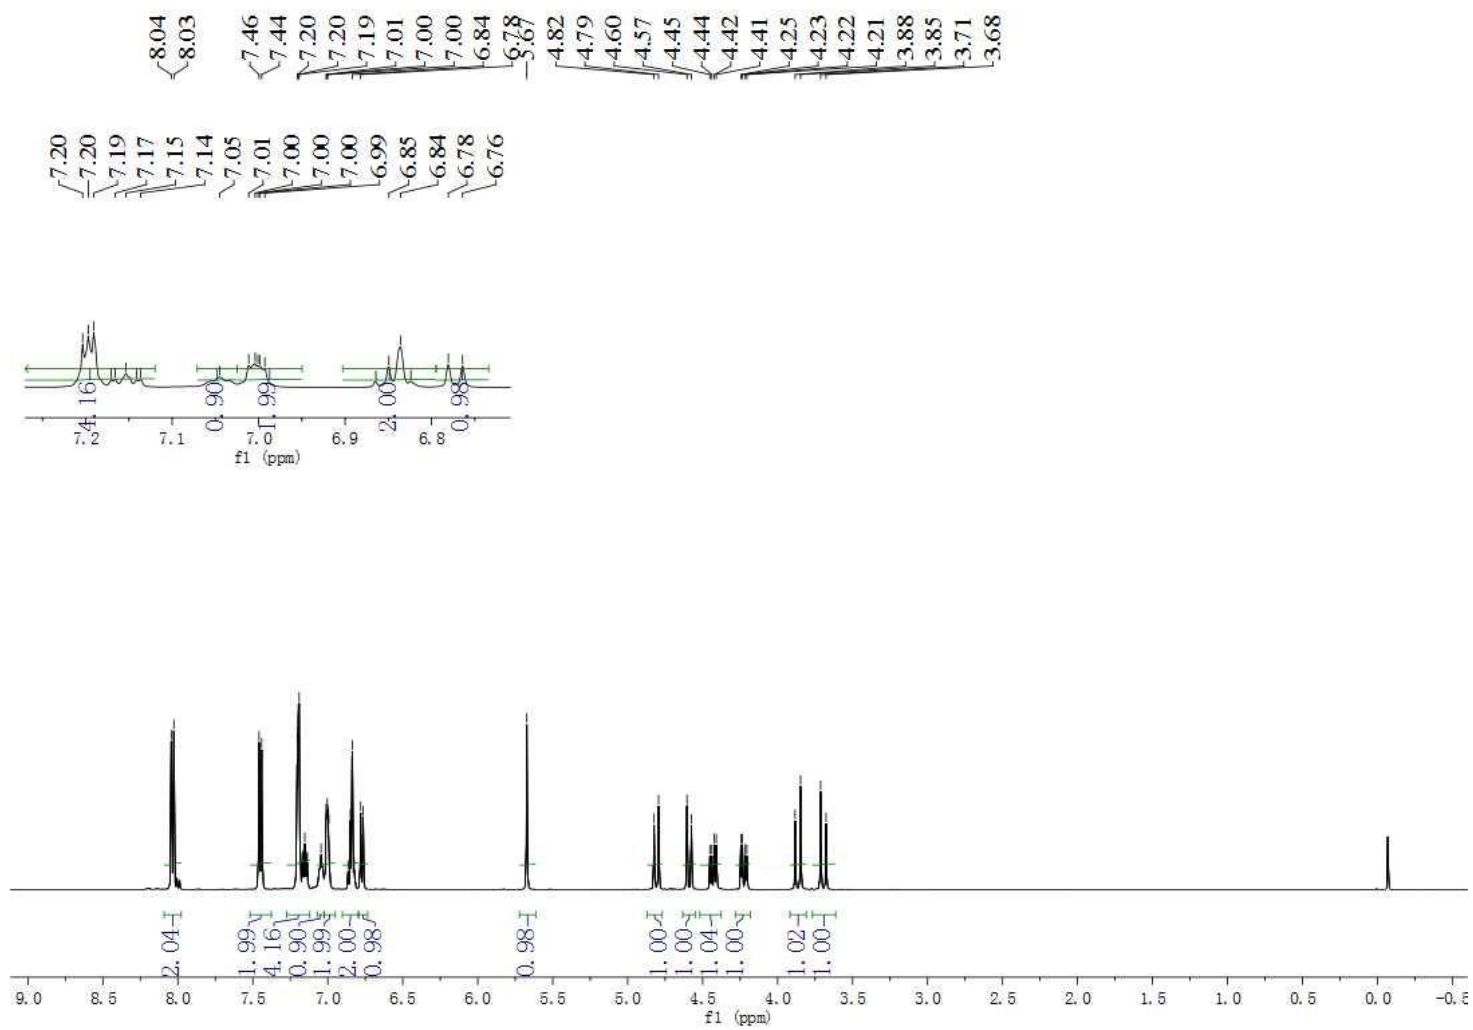

<sup>1</sup>H NMR of compound **5r**



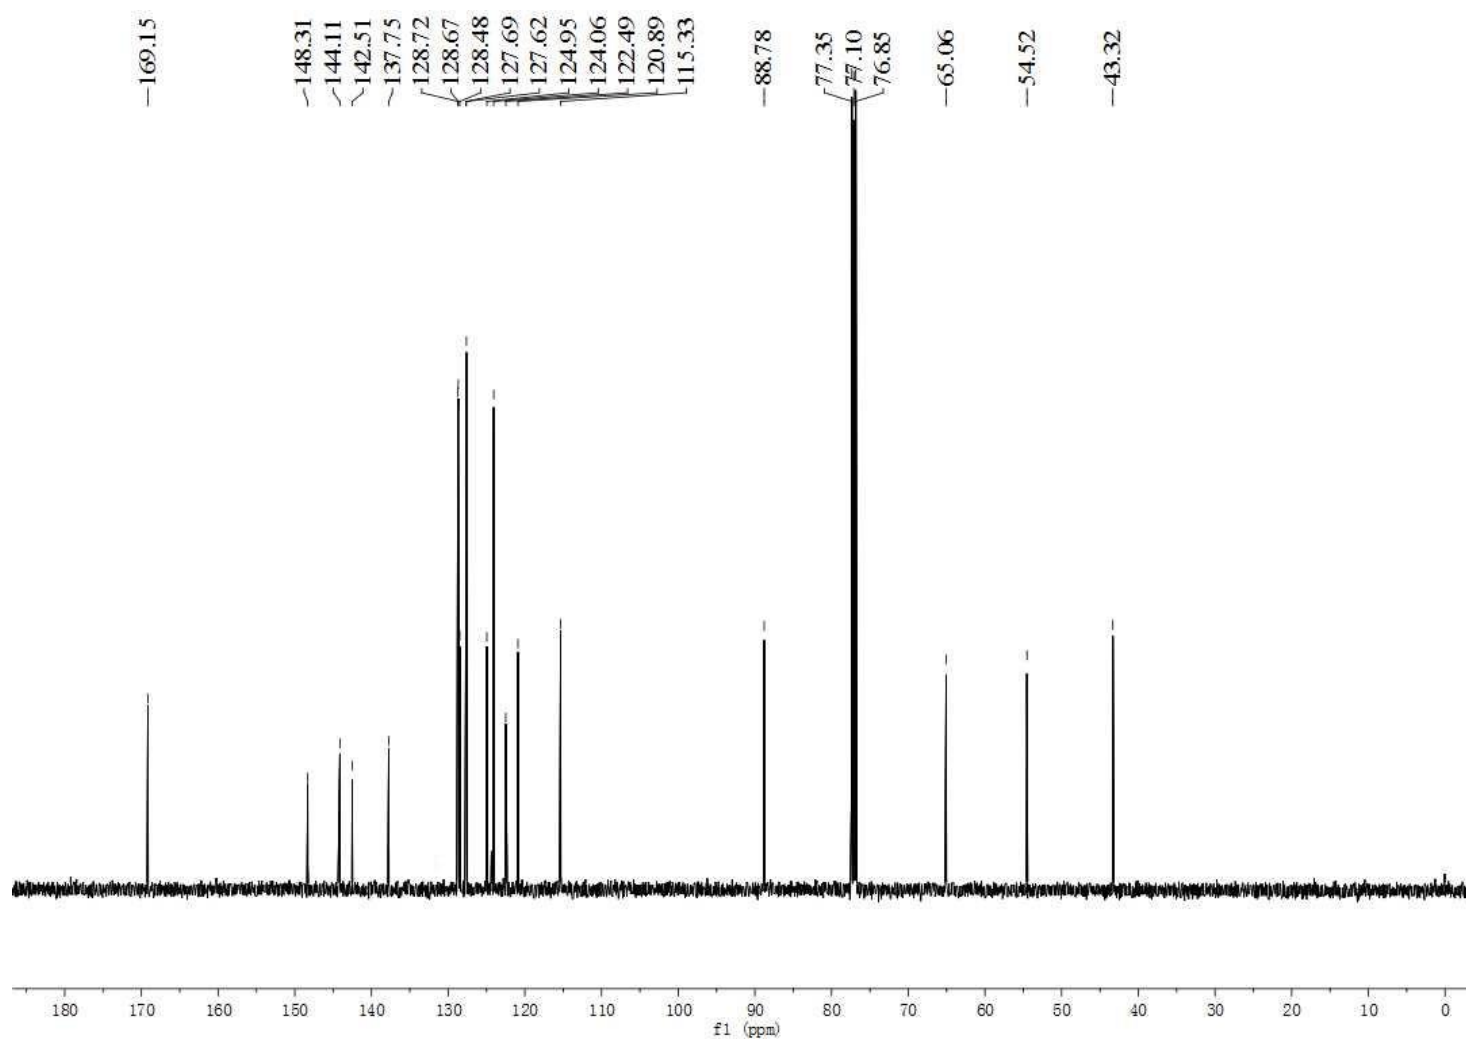

<sup>13</sup>C NMR of compound **5r**
